# Supplementary material
Source: PubMed Central journal article supplement (PMC3235052)

**Development of an Asymmetric Trimethylenemethane Cycloaddition Reaction:  
Application in the Enantioselective Synthesis of Highly Substituted Carbocycles**

Barry M. Trost, Steven M. Silverman, and James P. Stambuli  
*Department of Chemistry, Stanford University, Stanford, CA 94305-5080*

Supporting Information  
Selected Spectra

ssIII-53A  
 Pulse Sequence: s2pul  
 Solvent: CDCl3  
 Ambient temperature  
 INOVA-500 "ui500"  
 Pulse 60.0 degrees  
 Acq. time 4.000 sec  
 Width 8000.0 Hz  
 16 repetitions  
 OBSERVE F1 499.7485779 MHz  
 DATA PROCESSING  
 FT size 131072  
 Total time 1 min

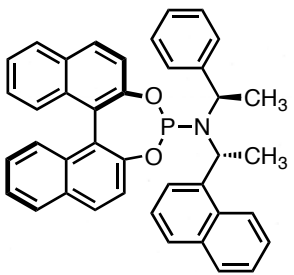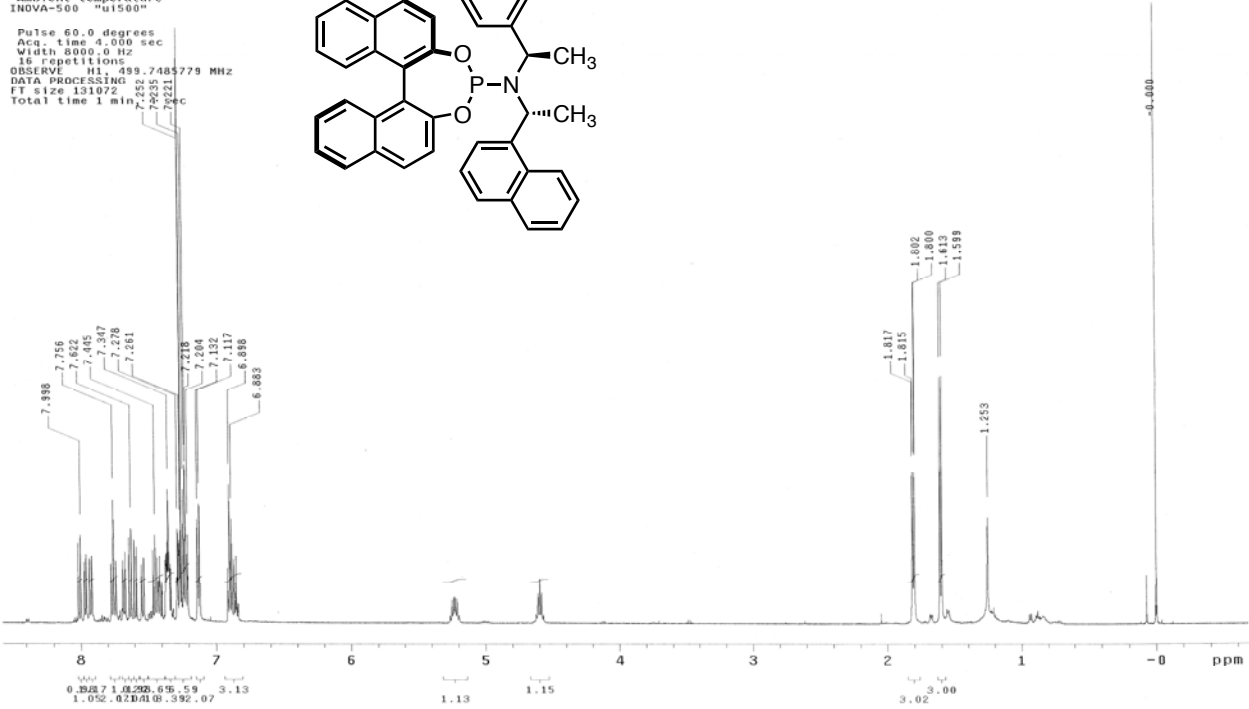

ssIII-53A-13C  
 Pulse Sequence: s2pul  
 Solvent: CDCl3  
 Ambient temperature  
 User: 1-15-07  
 INOVA-500 "ui500"  
 Relax. delay 0.500 sec  
 Pulse 33.3 degrees  
 Acq. time 1.500 sec  
 Width 35003.3 Hz  
 4362 repetitions  
 OBSERVE C13 125.6618062 MHz  
 DECOUPLE H1 499.7505666 MHz  
 300000  
 42.00  
 continuously on  
 WALTZ-16 modulated  
 DATA PROCESSING  
 Line broadening 1.0 Hz  
 FT size 131072  
 Total time 556 hr, 2 min, 35 sec

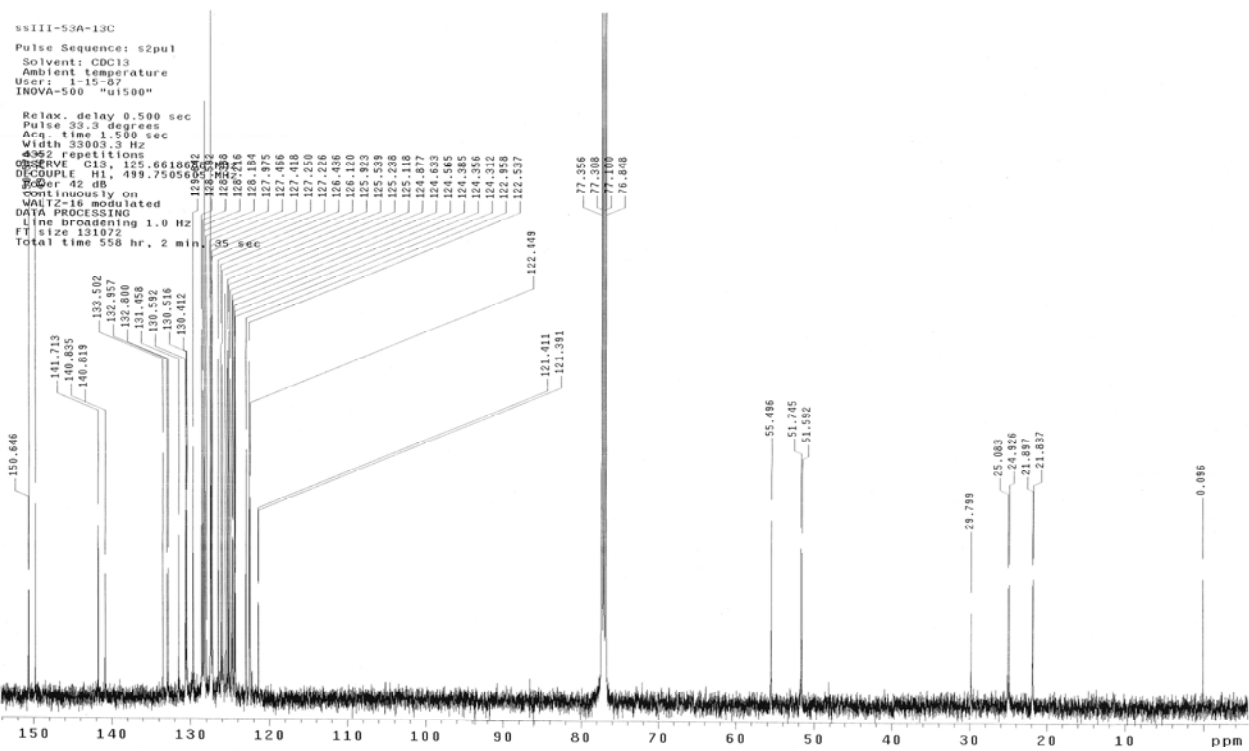

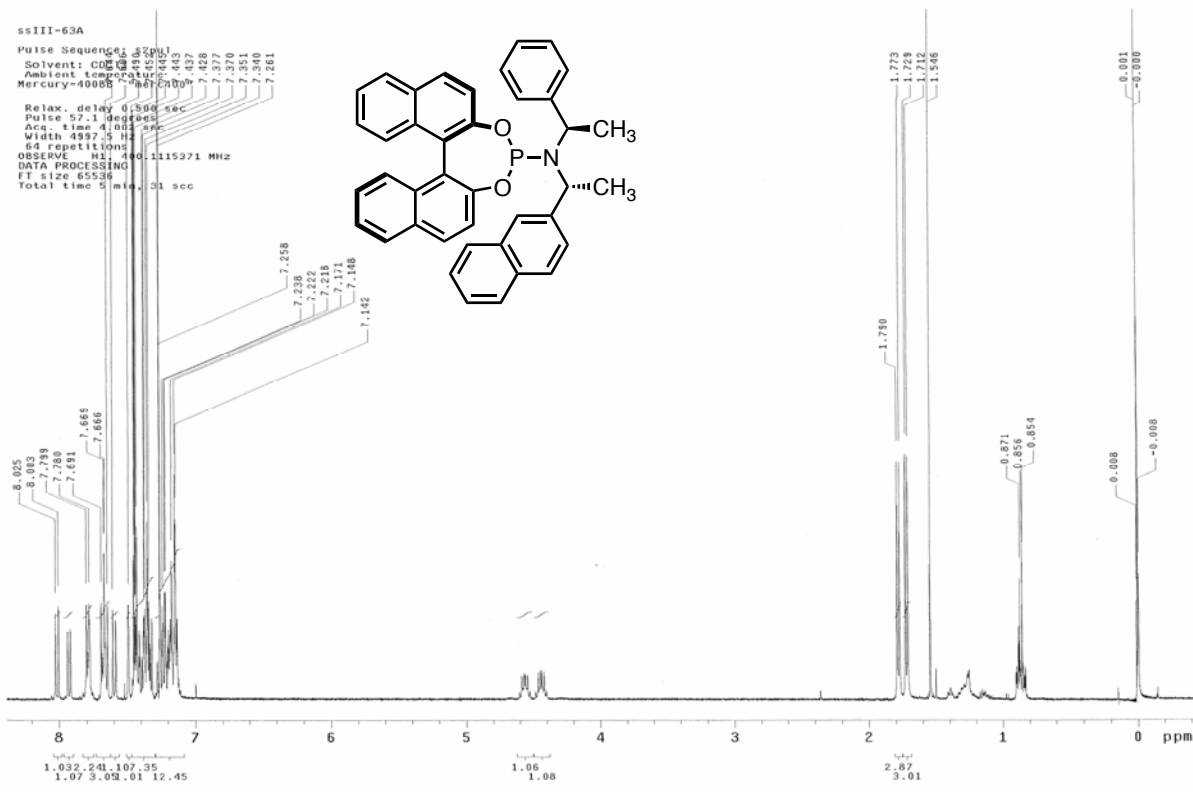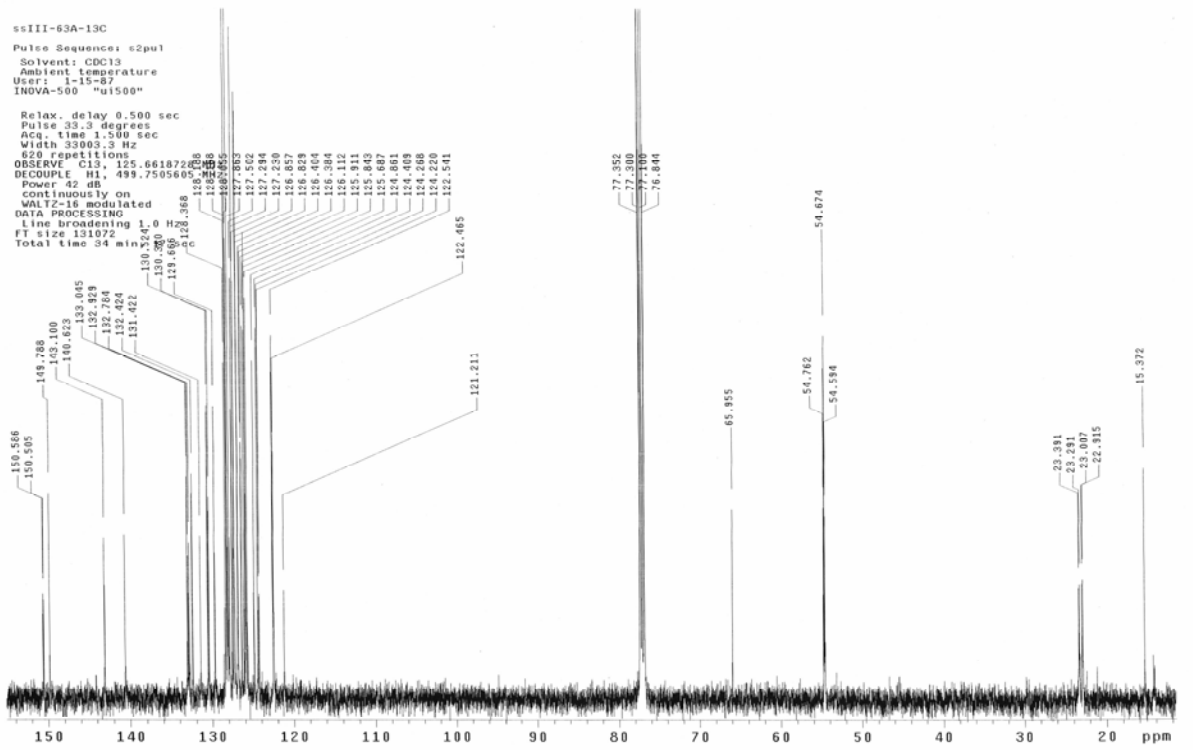

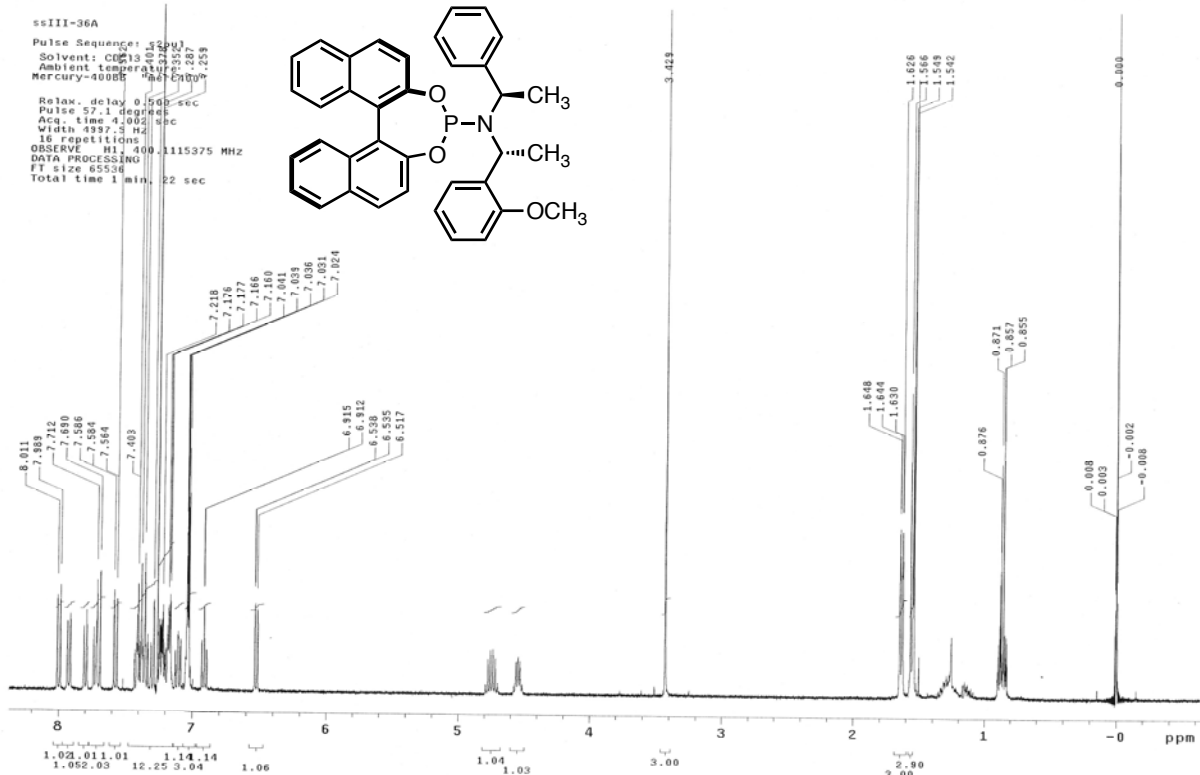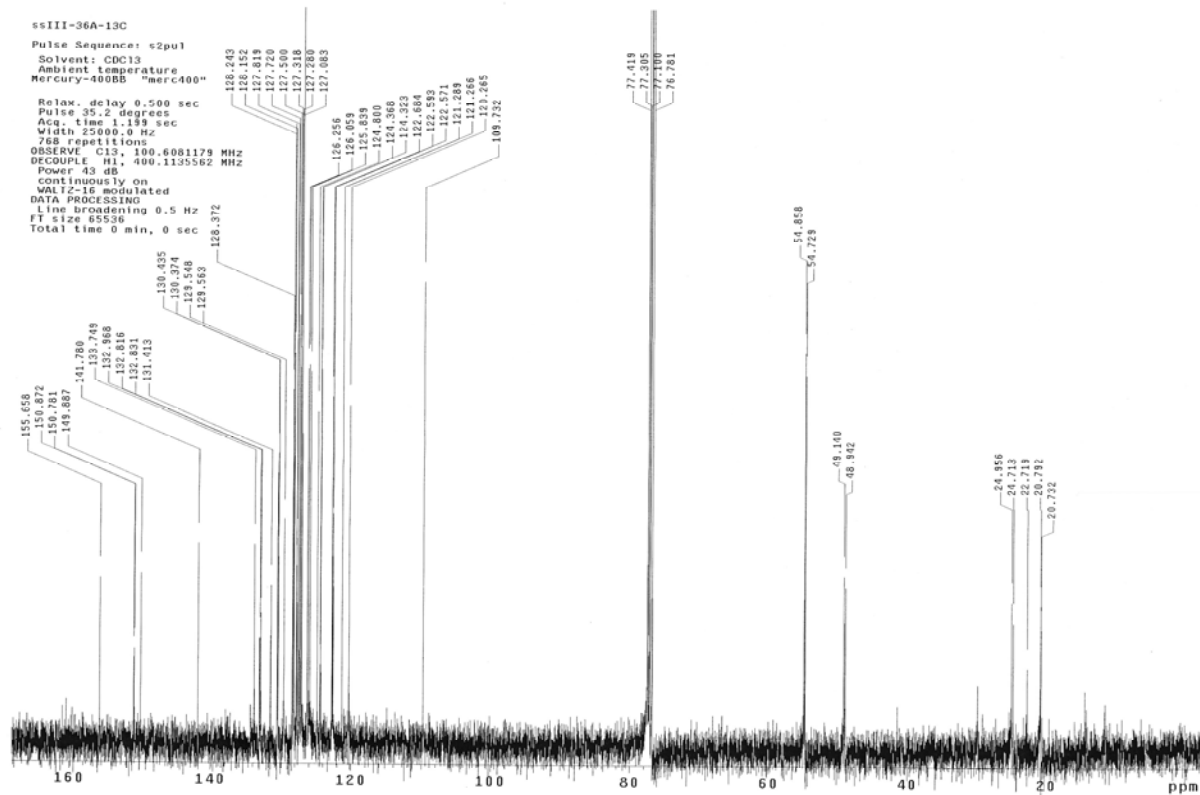





ssII-74A  
 Pulse Sequence: s2pul  
 Solvent: CDC13  
 Ambient temperature  
 Mercury-400BB "merc400"  
 Relax. delay 0.500 sec  
 Pulse 57.1 degrees  
 Acq. time 4.002 sec  
 Width 4997.5 Hz  
 64 repetitions  
 OBSERVE H1 400.1115370 MHz  
 DATA PROCESSING  
 FT size 65536  
 Total time 5 min, 31 sec

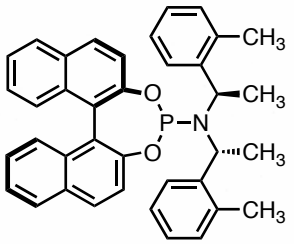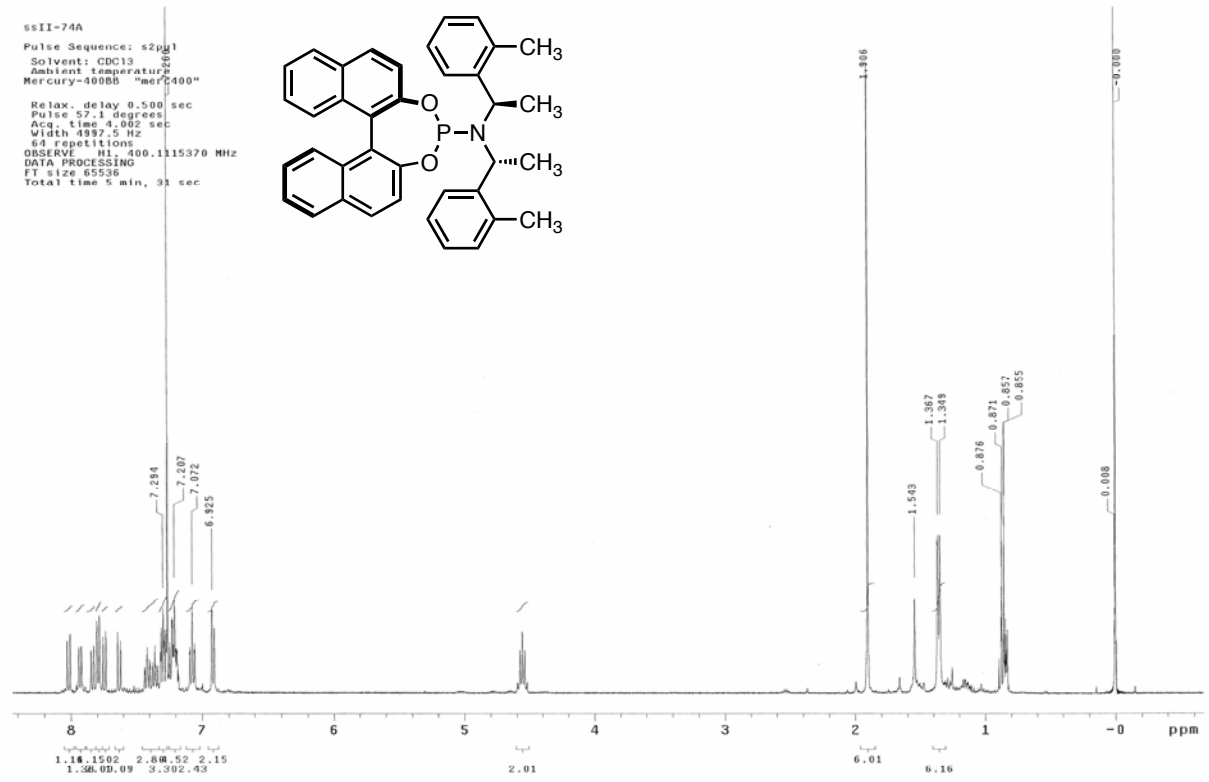

ssII-74A-31P  
 Pulse Sequence: s2pul  
 Solvent: CDC13  
 Ambient temperature  
 Mercury-400BB "merc400"  
 Relax. delay 2.000 sec  
 Pulse 47.4 degrees  
 Acq. time 0.000 sec  
 Width 59880.2 Hz  
 32 repetitions  
 OBSERVE P31 161.9680130 MHz  
 DECOUPLE H1 400.1135562 MHz  
 Power 43 dB  
 continuously on  
 WALTZ-16 modulated  
 DATA PROCESSING  
 Line broadening 1.0 Hz  
 FT size 131072  
 Total time 3 min, 10 sec

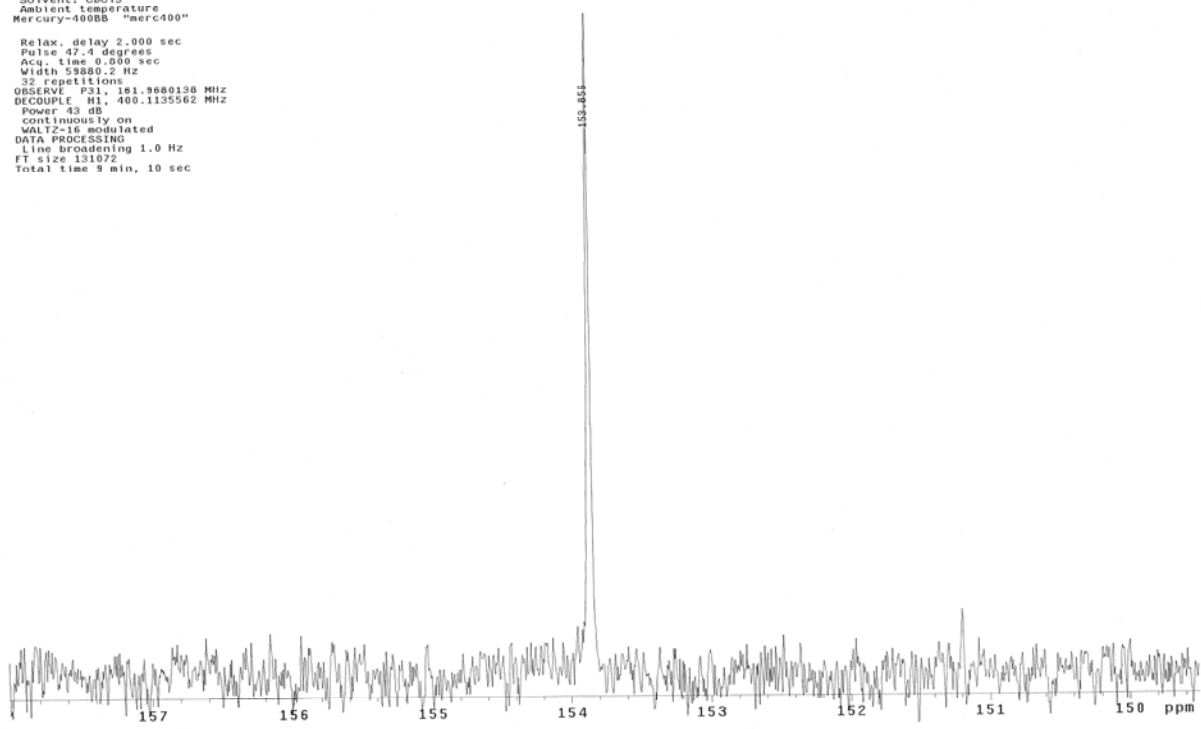





ssII-84A

Pulse Sequence: s2pul  
Solvent: CDCl3  
Ambient temperature  
INOVA-500 "u1500"  
Pulse 60.0 degrees  
Acq. time 4.000 sec  
Width 8000.0 Hz  
4 repetitions  
OBSERVE H1, 499.7486020 MHz  
DATA PROCESSING  
FT size 131072  
Total time 0 min, 16 sec

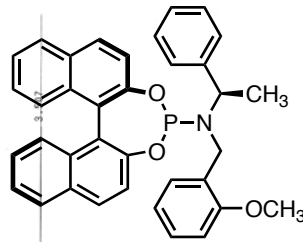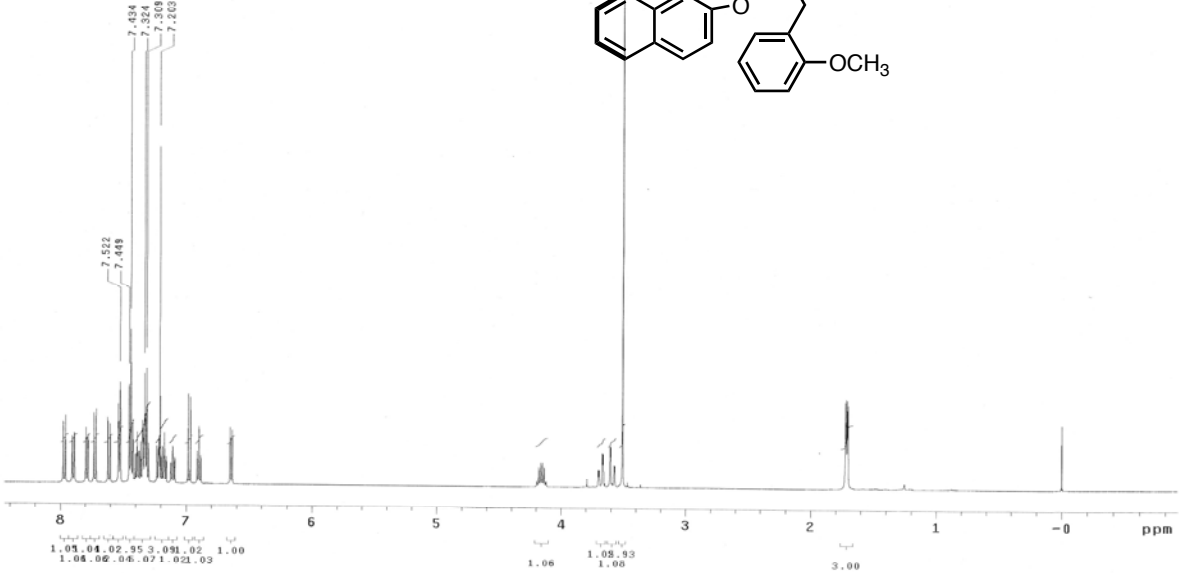

ssII-84A-13C

Pulse Sequence: s2pul  
Solvent: CDCl3  
Ambient temperature  
User: 1-15-87  
INOVA-500 "u1500"  
Relax. delay 0.500 sec  
Pulse 33.5 degrees  
Acq. time 1.500 sec  
Width 33003.3 Hz  
322 repetitions  
OBSERVE C13, 125.6618778 MHz  
DECUPLE H1, 499.7505605 MHz  
Power 42 dB  
continuously on  
WALTZ-16 modulated  
DATA PROCESSING  
Line Broadening 2.0 Hz  
FT size 131072  
Total time 34 min, 17 sec

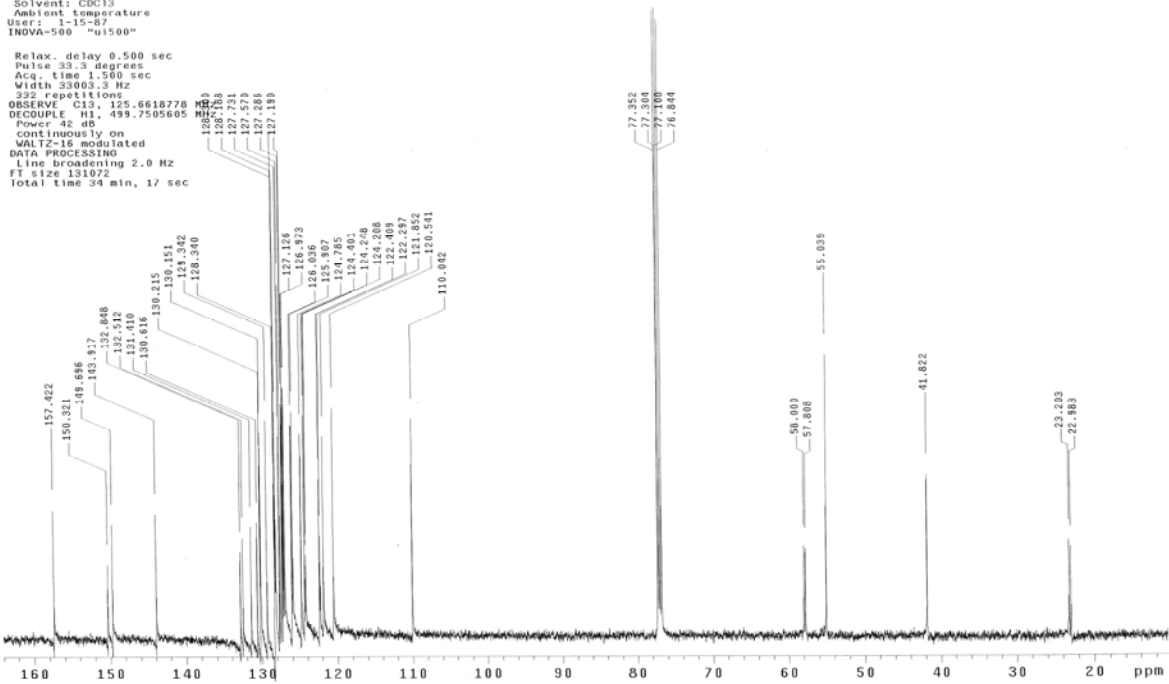

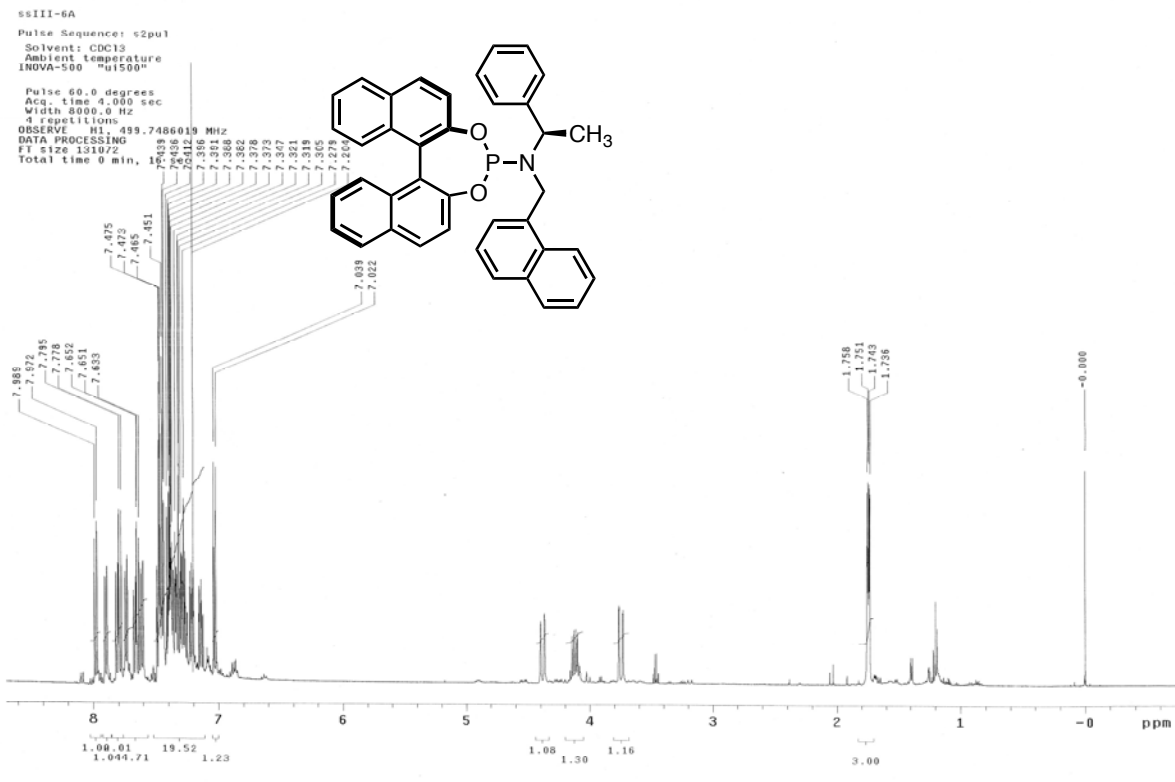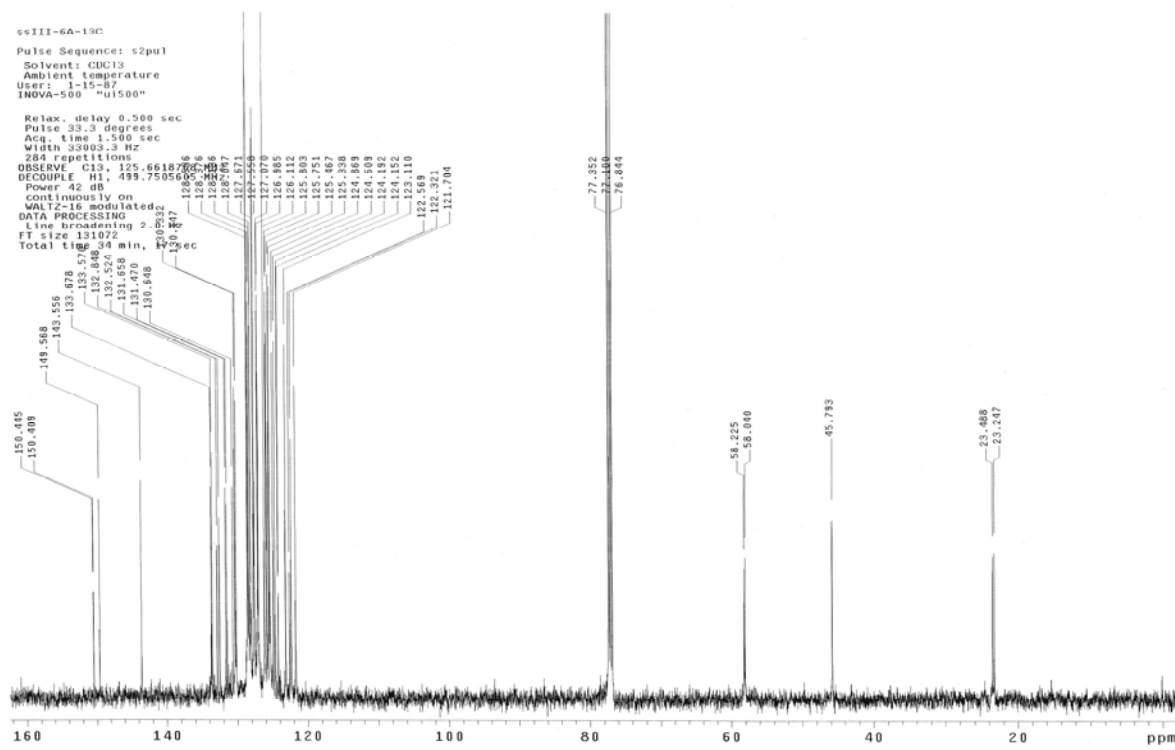

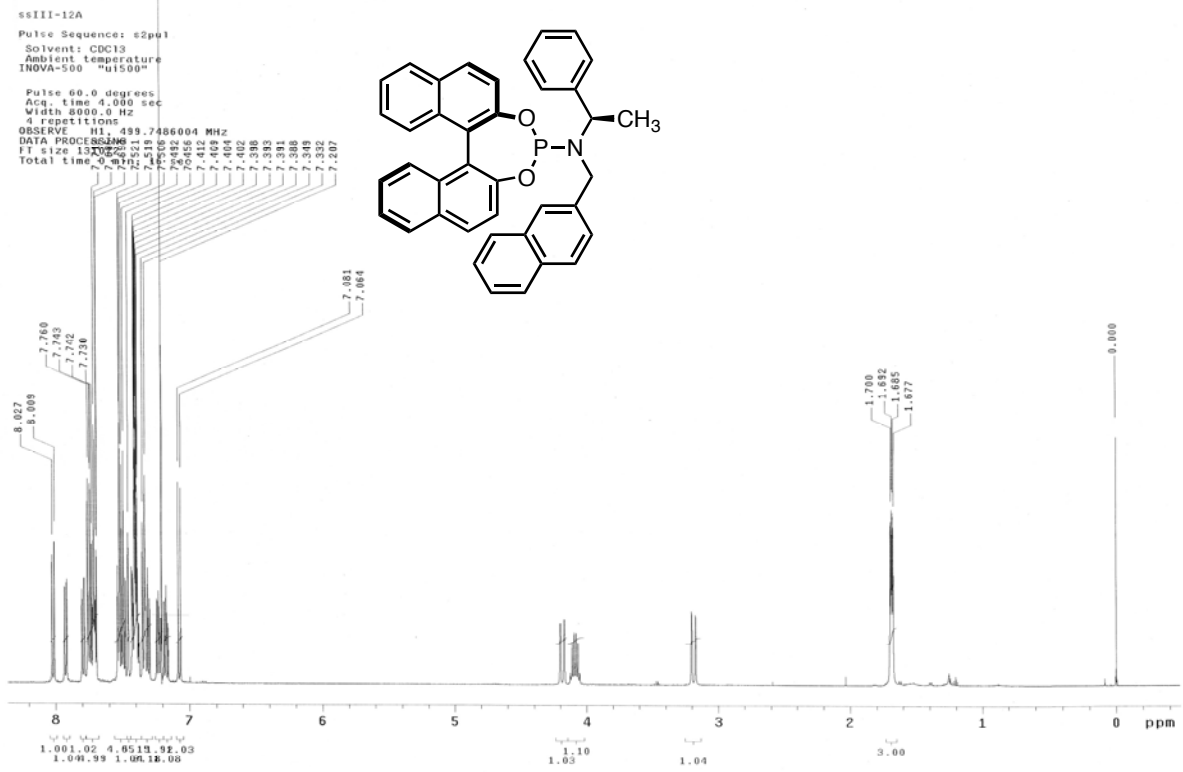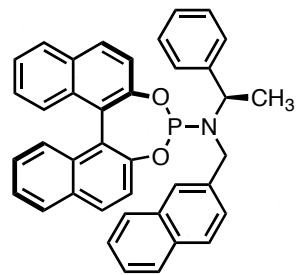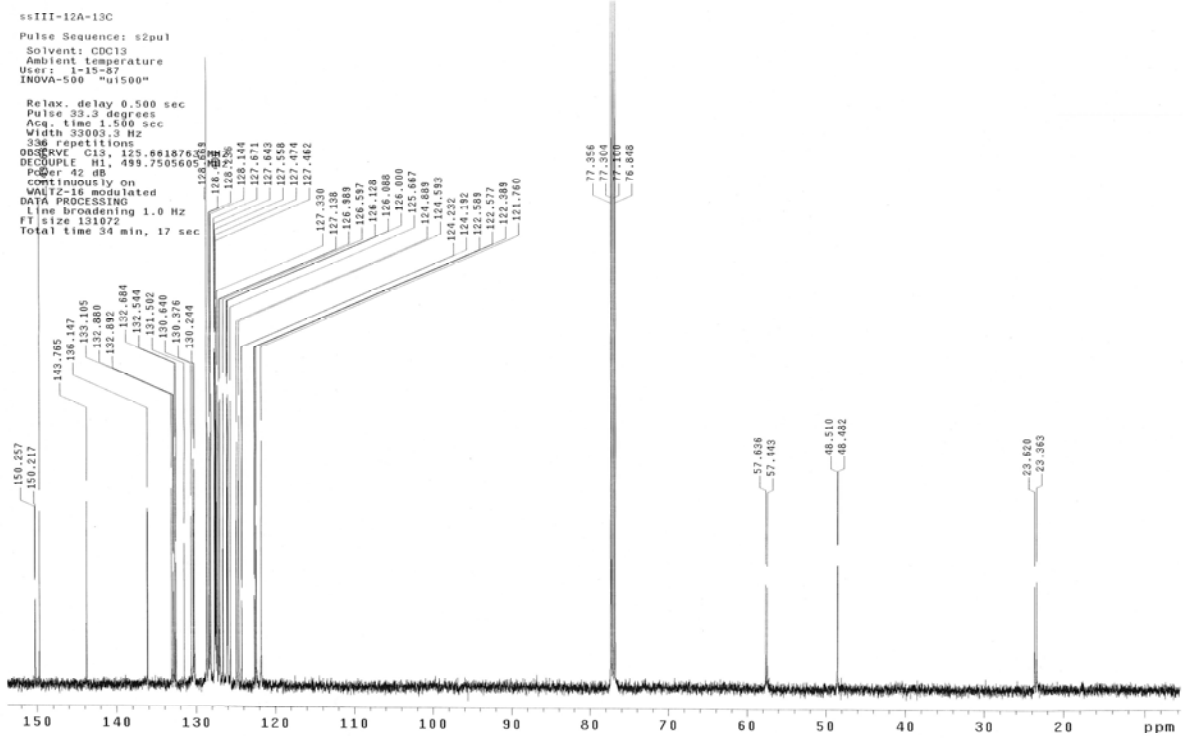

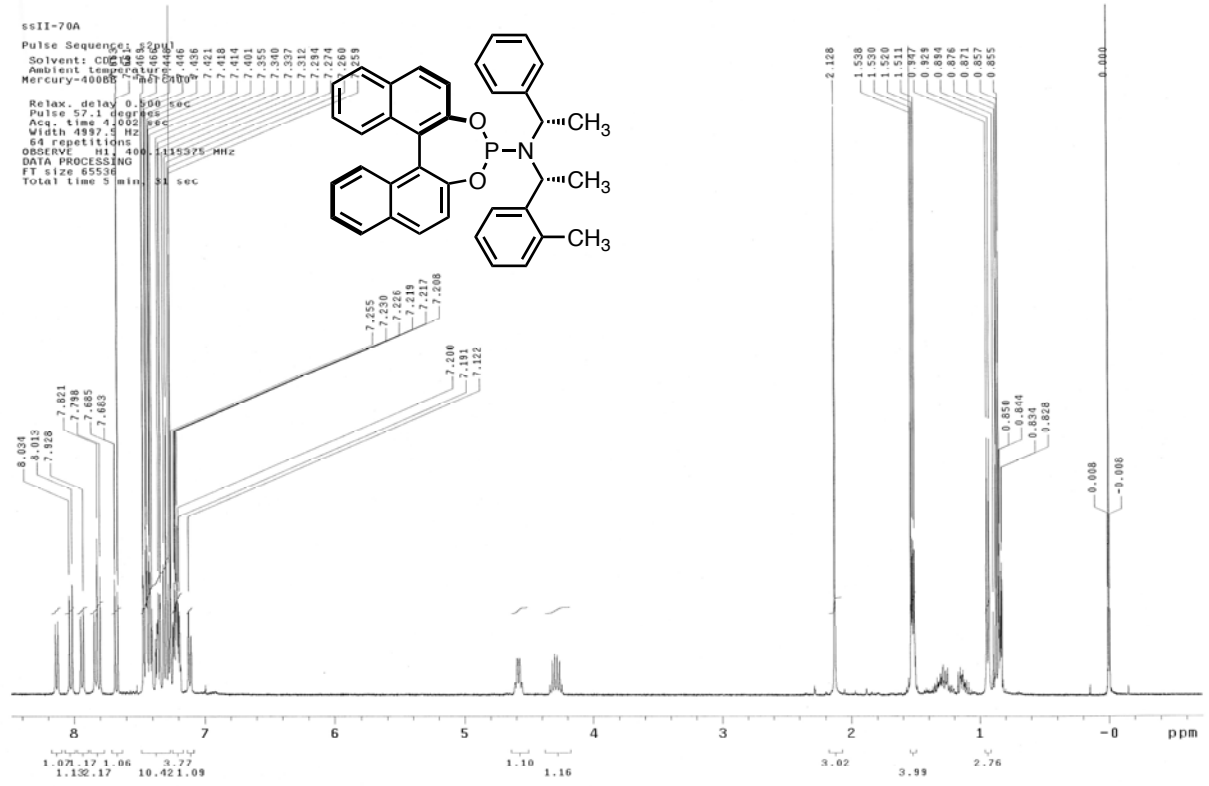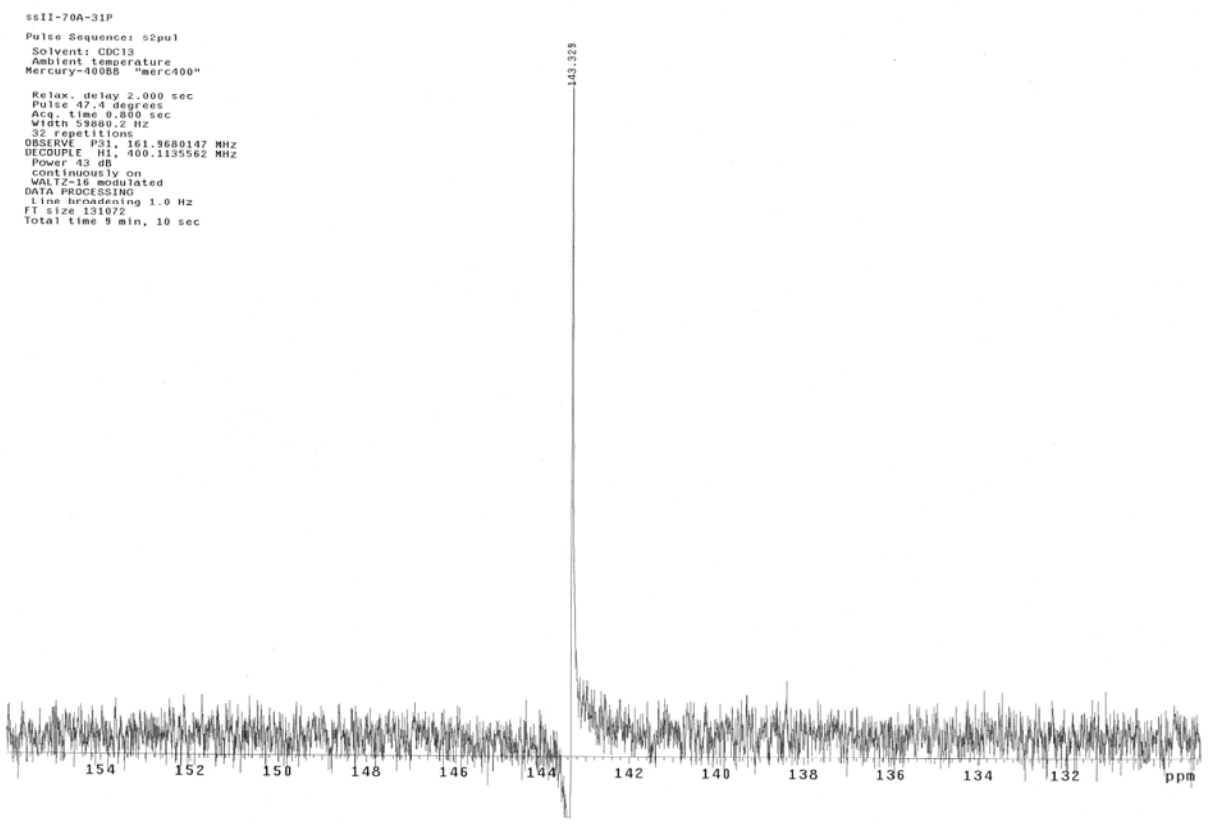









ssIII-58A  
 Pulse Sequence: s2pu1  
 Solvent: CDCl3  
 Ambient temperature  
 INOVA-500 "u1500"  
 Pulse 60.0 degrees  
 Acq. time 4.000 sec  
 Width 8000.0 Hz  
 16 repetitions  
 OBSERVE: H1, 499.7485821 MHz  
 DATA PROCESSING  
 FT size 131072  
 Total time 1 min, 7.243

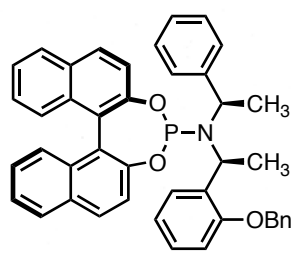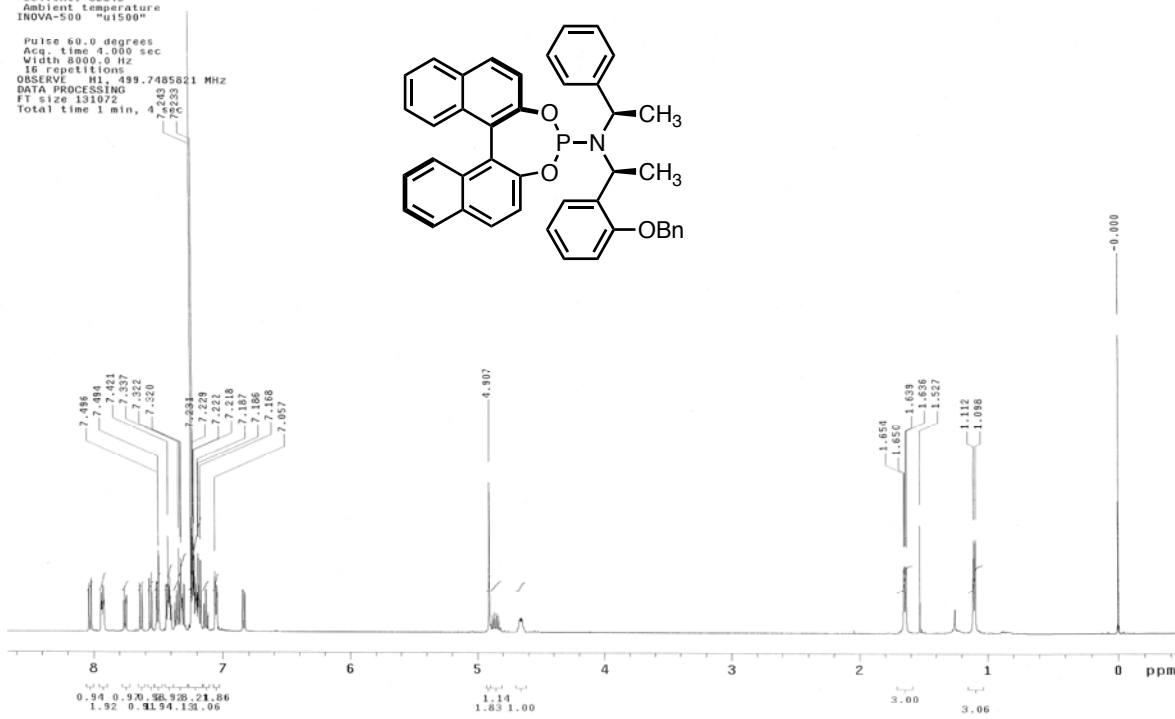

ssIII-58A-13C  
 Pulse Sequence: s2pu1  
 Solvent: CDCl3  
 Ambient temperature  
 User: 1-15-87  
 INOVA-500 "u1500"  
 Relax. delay 0.500 sec  
 Pulse 33.3 degrees  
 Acq. time 1.500 sec  
 Width 33003.3 Hz  
 584 repetitions  
 OBSERVE: H1, 499.7485821 MHz  
 SOLVENT: CDCl3  
 EXCITE: 2-16 modulated  
 DATA PROCESSING  
 Line broadening 1.0 Hz  
 FT size 131072  
 Total time 34 min, 17 sec

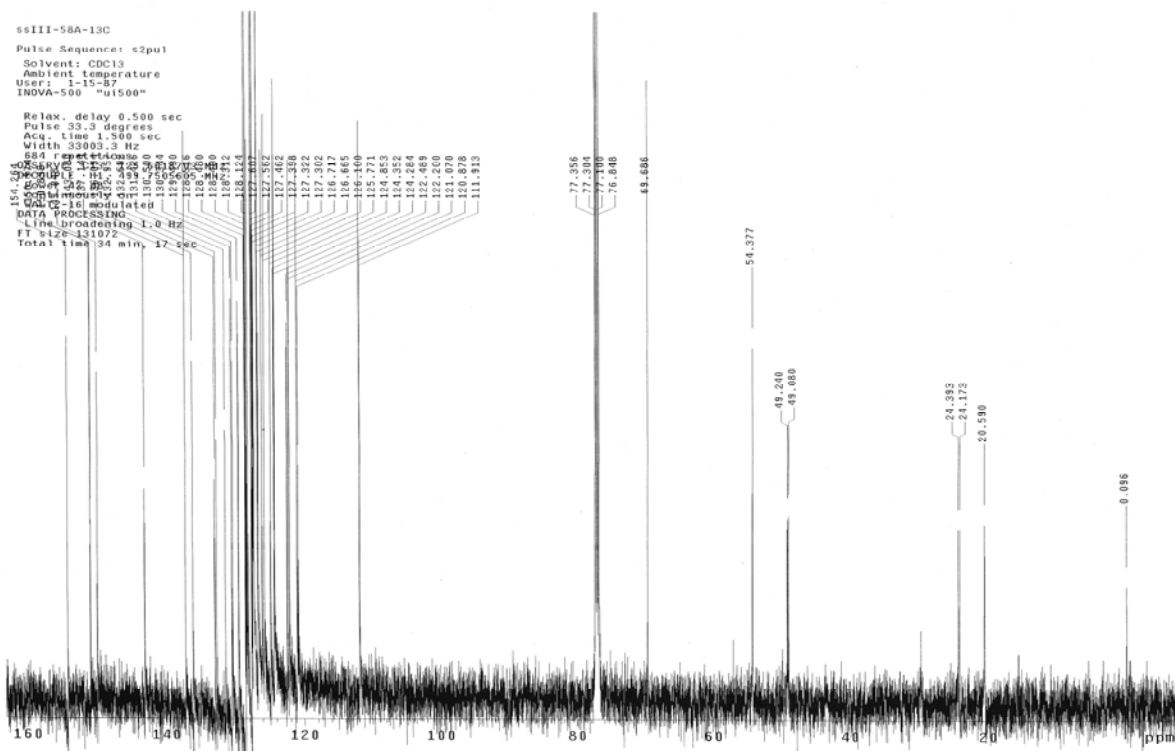

ssIV-50A  
Pulse Sequence: s2pu1  
Solvent: CDC13  
Ambient temperature  
Mercury-400BB "merc400"  
Relax. delay 0.500 sec  
Pulse 57.1 degrees  
Acq. time 4.002 sec  
Width 4997.5 Hz  
4 repetitions  
OBSERVE H1, 400.1115497 MHz  
DATA PROCESSING  
FT size 65536  
Total time 0 min, 20 sec

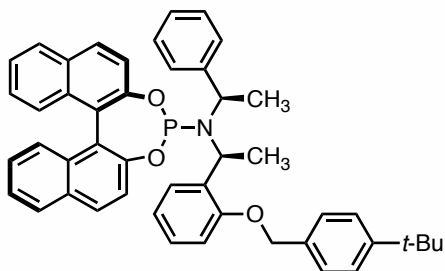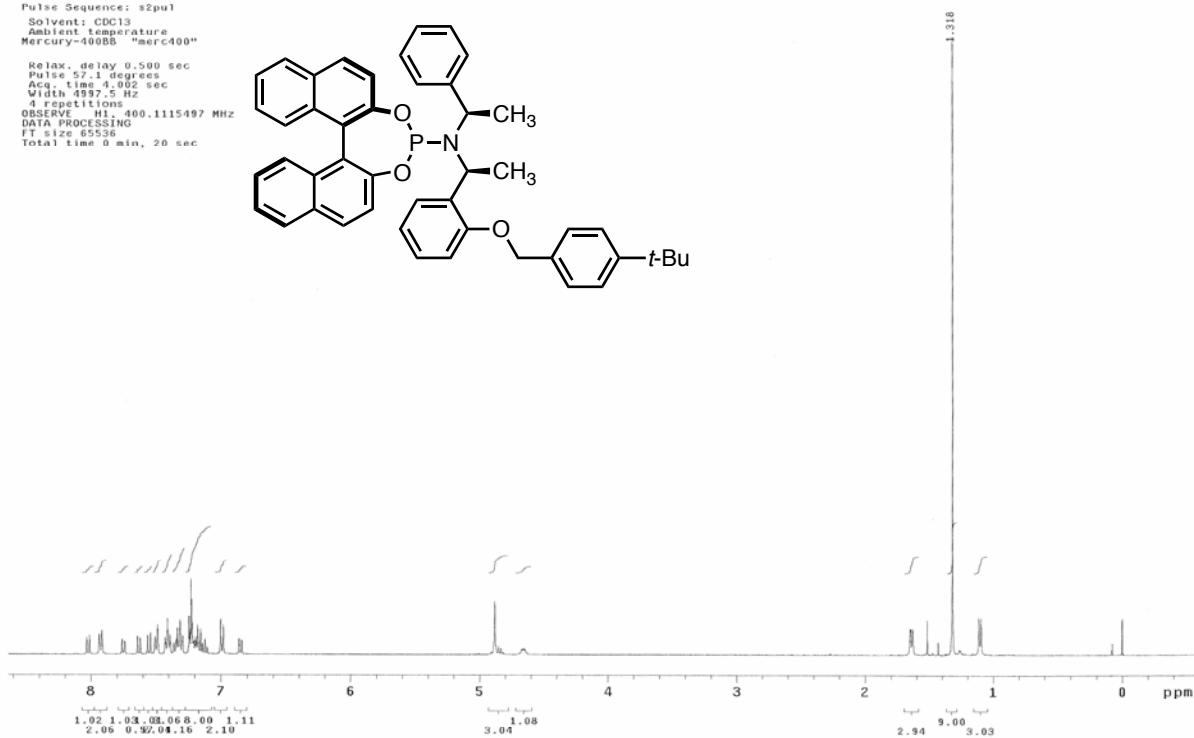

ssIV-50A-13C  
Pulse Sequence: s2pu1  
Solvent: CDC13  
Ambient temperature  
Mercury-400BB "merc400"  
Relax. delay 0.500 sec  
Pulse 35.2 degrees  
Acq. time 1.139 sec  
Width 25000.0 Hz  
380 repetitions  
OBSERVE C13, 100.6081295 MHz  
DECOUPLE H1, 400.1135562 MHz  
Power 43 dB  
continuously on  
WALTZ-16 modulated  
DATA PROCESSING  
Line broadening 2.0 Hz  
FT size 65536  
Total time 33 min, 33 sec

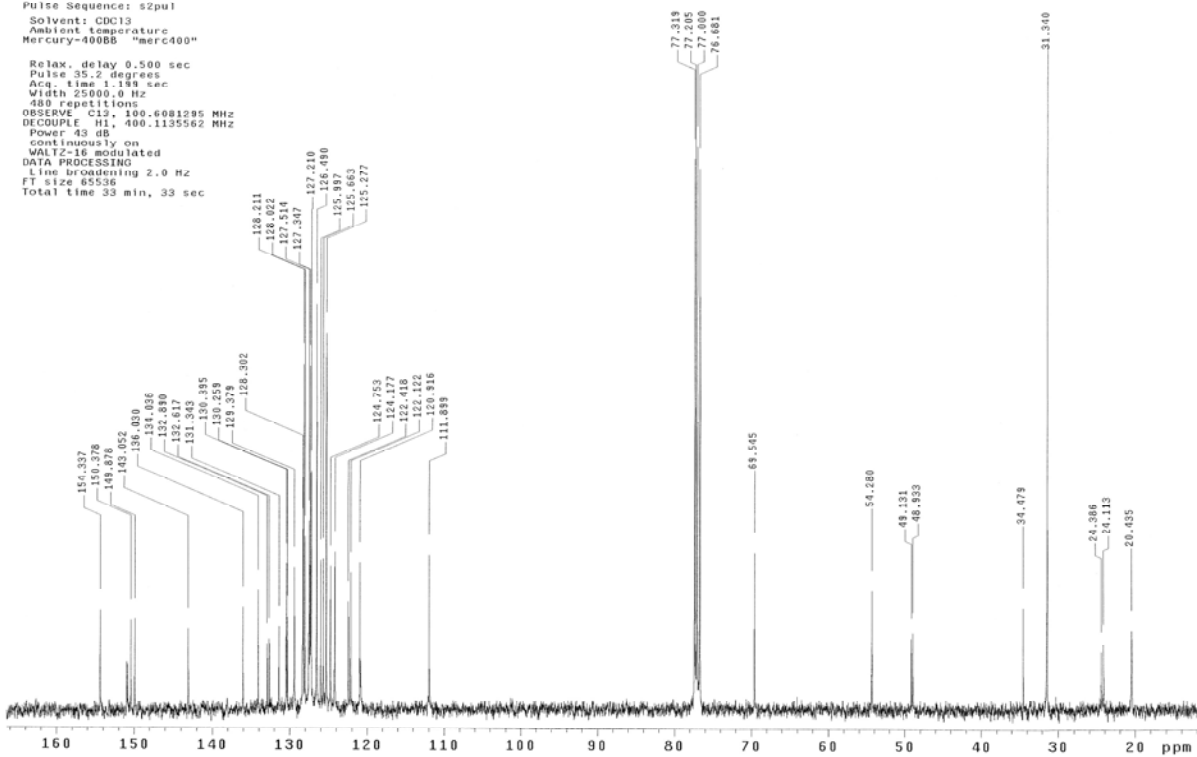

ssIII-56A  
 Pulse Sequence: s2pu1  
 Solvent: CDCl3  
 Ambient temperature  
 INOVA-500 "ui500"

Pulse 60.0 degrees  
 Acq. time 6.300 sec  
 Width 8000.0 Hz  
 15 repetitions  
 OBSERVE M1, 499.7485854 MHz  
 DATA PROCESSING  
 FT size 131072  
 Total time 1 min,

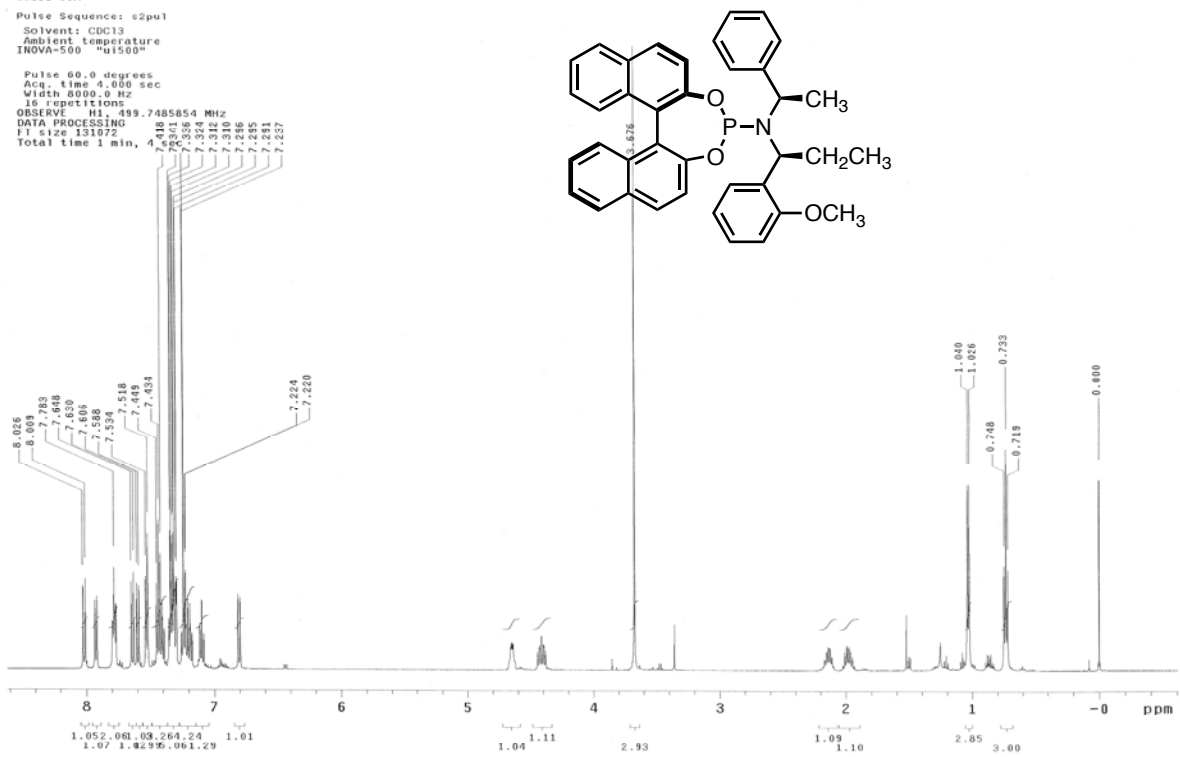

ssIII-56A-13C  
 Pulse Sequence: s2pu1  
 Solvent: CDCl3  
 Ambient temperature  
 User: 1-15-87  
 INOVA-500 "ui500"

Relax. delay 0.500 sec  
 Pulse 35.3 degrees  
 Acq. time 1.500 sec  
 Width 33003.3 Hz  
 484 repetitions  
 OBSERVE C13, 125.6618723 MHz  
 DECOUPLE M1, 499.7505605 MHz  
 Power 42 dB  
 continuously on  
 WALTZ-16 modulated  
 DATA PROCESSING  
 Line broadening 1.0  
 FT size 131072  
 Total time 34 min

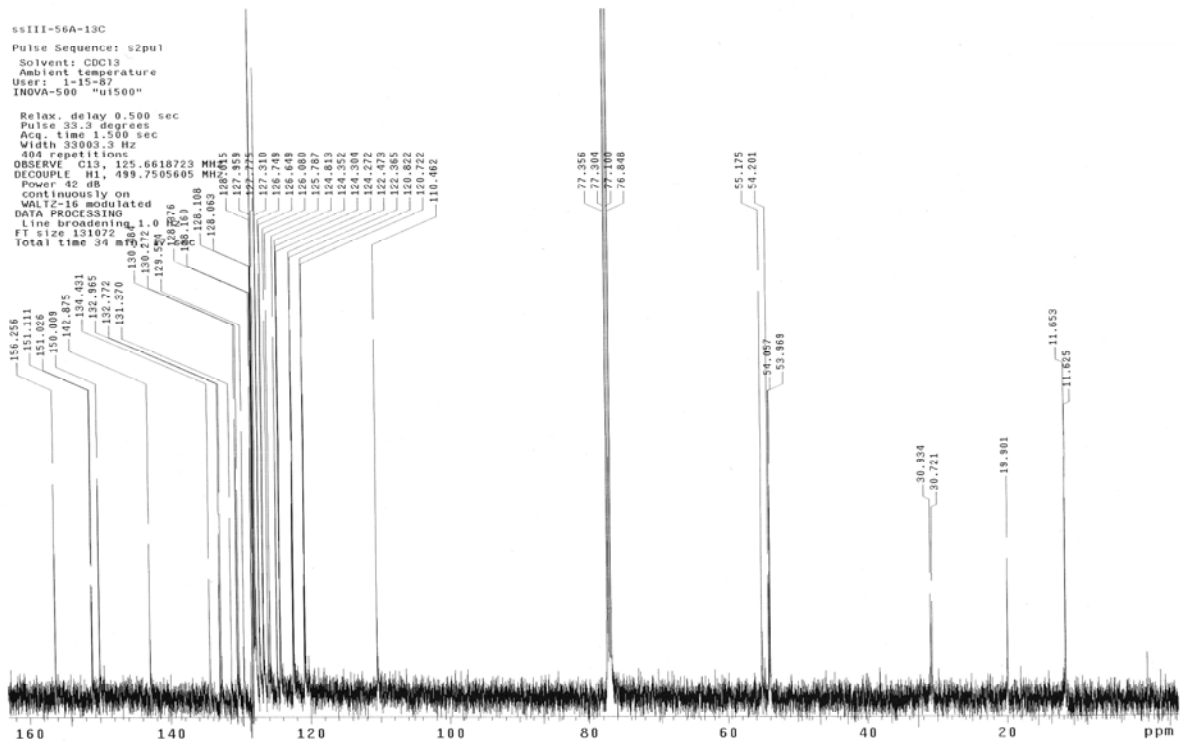

ssIII-35A  
 Pulse Sequence: s2pu1  
 Solvent: CDCl3  
 Ambient temperature  
 INOVA-500 "ui500"  
 Pulse 60.0 degrees  
 Acq. time 4.000 sec  
 Width 8000.0 Hz  
 16 repetitions  
 OBSERVE H1, 499.7485784 MHz  
 DATA PROCESSING  
 FT size 131072  
 Total time 1 min, 7.250 sec

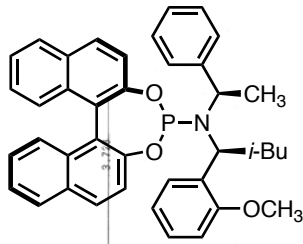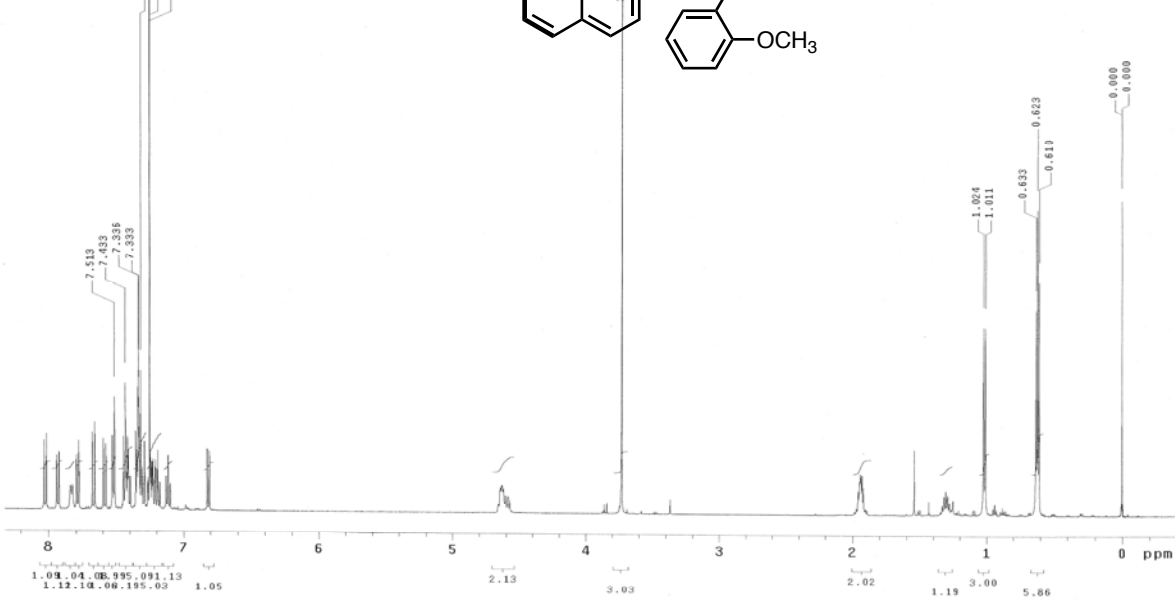

ssIII-35A-13C  
 Pulse Sequence: s2pu1  
 Solvent: CDCl3  
 Ambient temperature  
 User: 1-15-87  
 INOVA-500 "ui500"  
 Relax. delay 0.500 sec  
 Pulse 35.3 degrees  
 Acq. time 1.500 sec  
 Width 53003.3 Hz  
 784 repetitions  
 OBSERVE C13, 125.66187903  
 DICOUPL H1, 499.7505605  
 Power 42 dB  
 Continuously on  
 WALTZ-16 modulated  
 DATA PROCESSING  
 Line broadening  
 FT size 131072  
 Total time 3 min, 13.500 sec

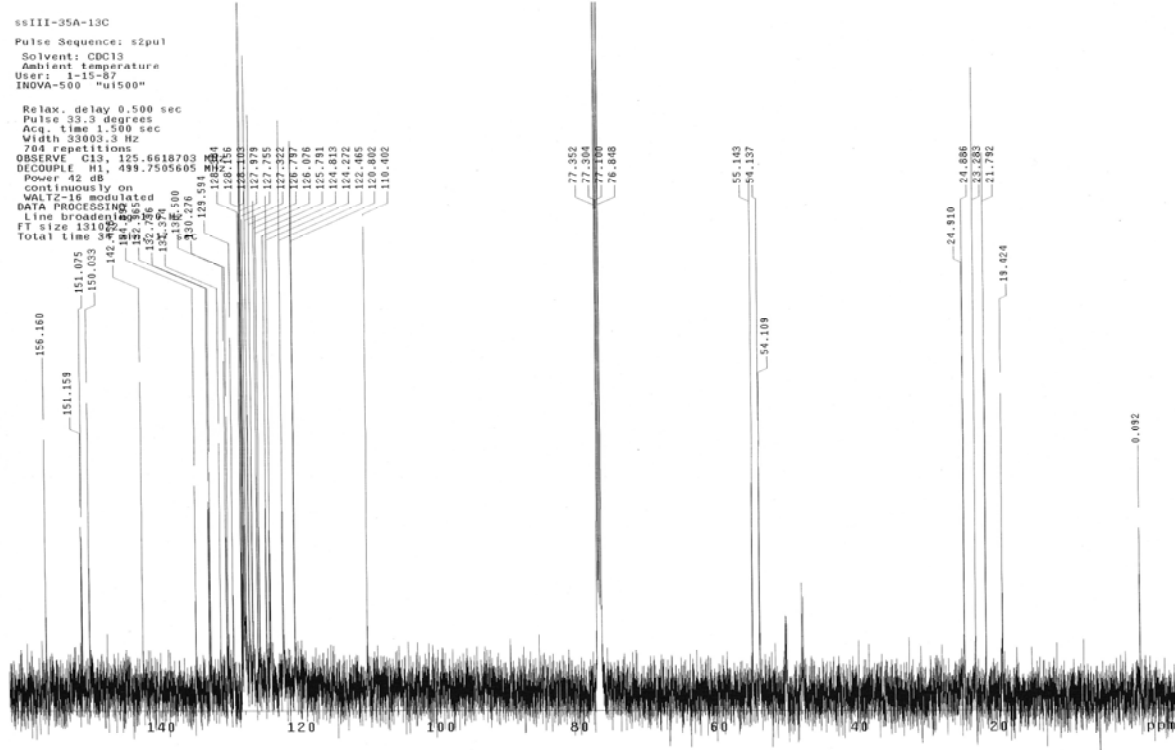







sxxii-58a  
 File: Proton  
 Pulse Sequence: s2pul  
 Solvent: cdcl3  
 Temp: 20.0 C / 293.1 K  
 Operator: stoves1  
 VNMRS-400 "nmr400"  
 Relax. delay 0.500 sec  
 Pulse 45.0 degrees  
 Acq. time 4.000 sec  
 Width 3603.4 Hz  
 32 repetitions  
 OBSERVE H1, 399.7291498 MHz  
 DATA PROCESSING  
 FT size 65536  
 Total time 2 min, 24 sec

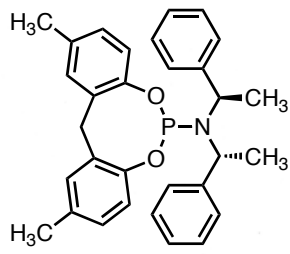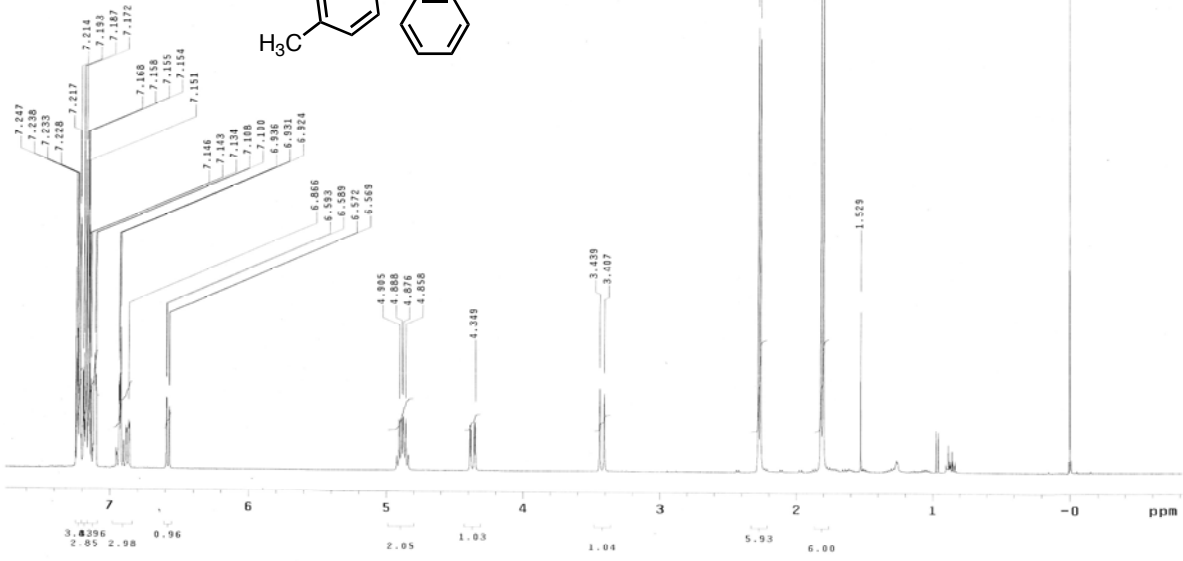

sxxii-58a-31p  
 File: Phosphorus  
 Pulse Sequence: s2pul  
 Solvent: CDCl3  
 Temp: 20.0 C / 293.1 K  
 Operator: stoves1  
 VNMRS-400 "nmr400"  
 Relax. delay 1.000 sec  
 Pulse 45.0 degrees  
 Acq. time 1.000 sec  
 Width 50000.0 Hz  
 16 repetitions  
 OBSERVE P31, 161.8132235 MHz  
 DECOUPLE H1, 399.7311459 MHz  
 Power 43 dB  
 continuously on  
 WALTZ-16 modulated  
 DATA PROCESSING  
 Line broadening 1.0 Hz  
 FT size 262144  
 Total time 2 min, 46 sec

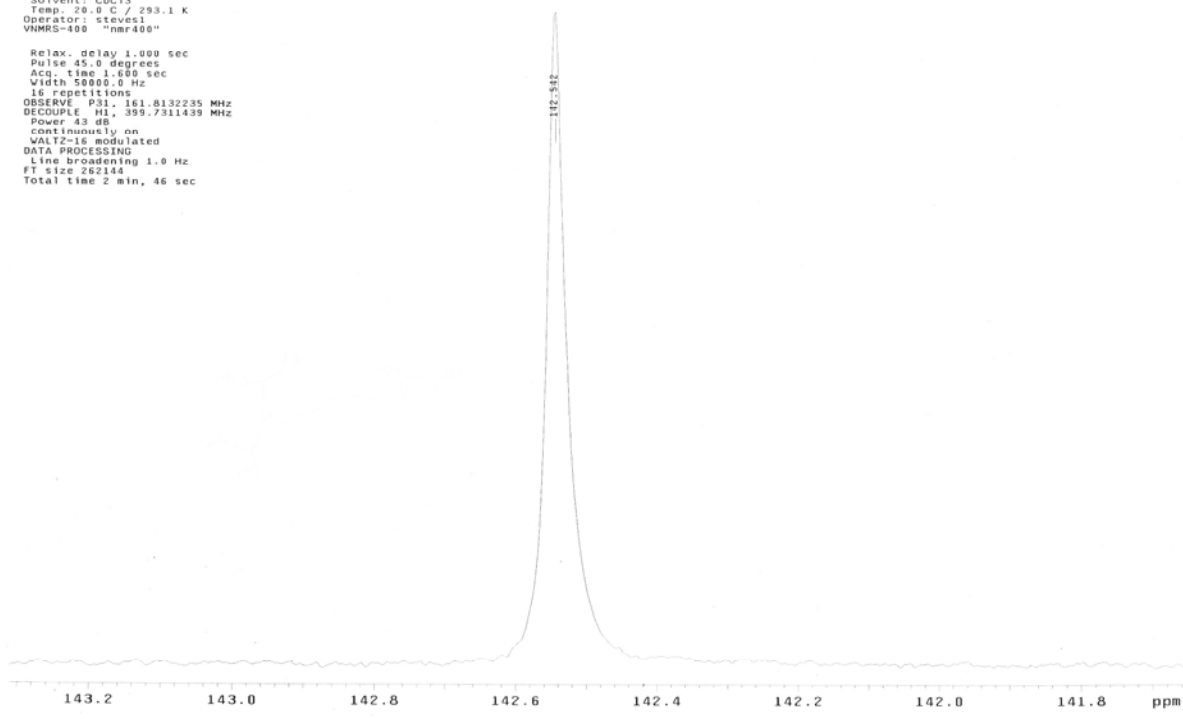



ssV-17A  
 Pulse Sequence: s2pu1  
 Solvent: CDCl3  
 Ambient temperature  
 INOVA-500 "u1500"

Pulse 60.0 degrees  
 Acq. time 4.000 sec  
 Width 8000.0 Hz  
 OBSERVE H1, 499.7485853 MHz  
 DATA PROCESSING  
 FT size 65536  
 Total time 9.00 min

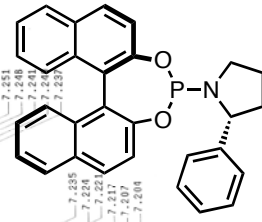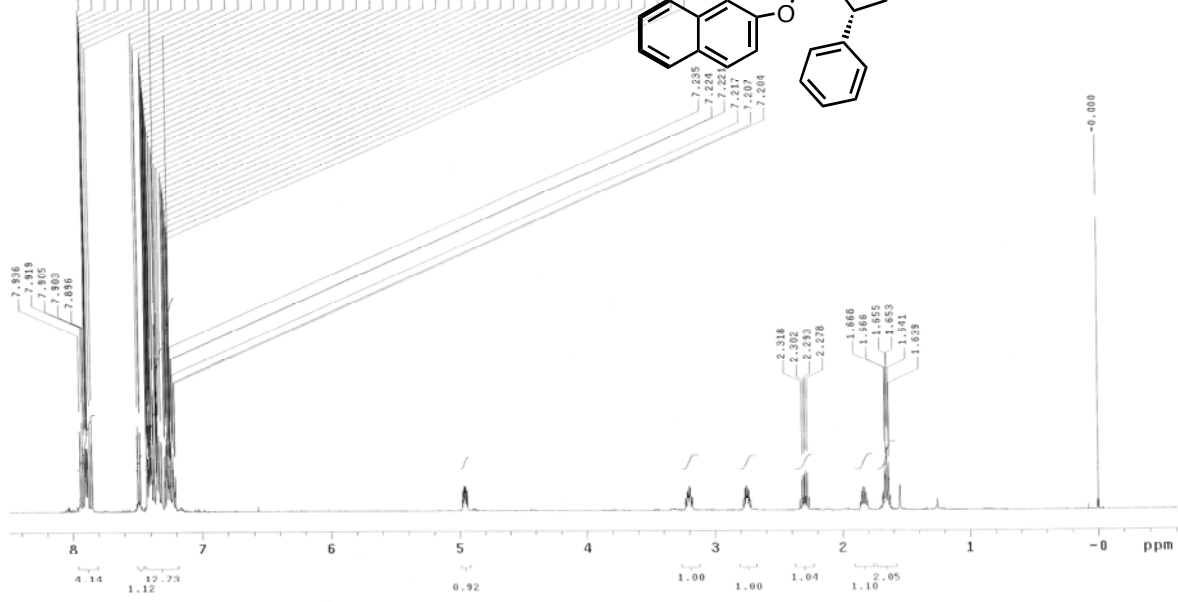

ssV-17A-13C  
 Pulse Sequence: s2pu1  
 Solvent: CDCl3  
 Ambient temperature  
 User: T-15-8  
 INOVA-500 "u1500"

Relax. delay 0.500 sec  
 Pulse 35.3 degrees  
 Acq. time 1.500 sec  
 Width 33000.0 Hz  
 OBSERVE C13, 125.762 MHz  
 DECOUPLE H1, 499.7485853 MHz  
 Power 42 dB  
 Continuously on  
 WALTZ-16 modulated  
 DATA PROCESSING  
 Line broadening 2.0 Hz  
 FT size 131072  
 Total time 34 min, 17 sec

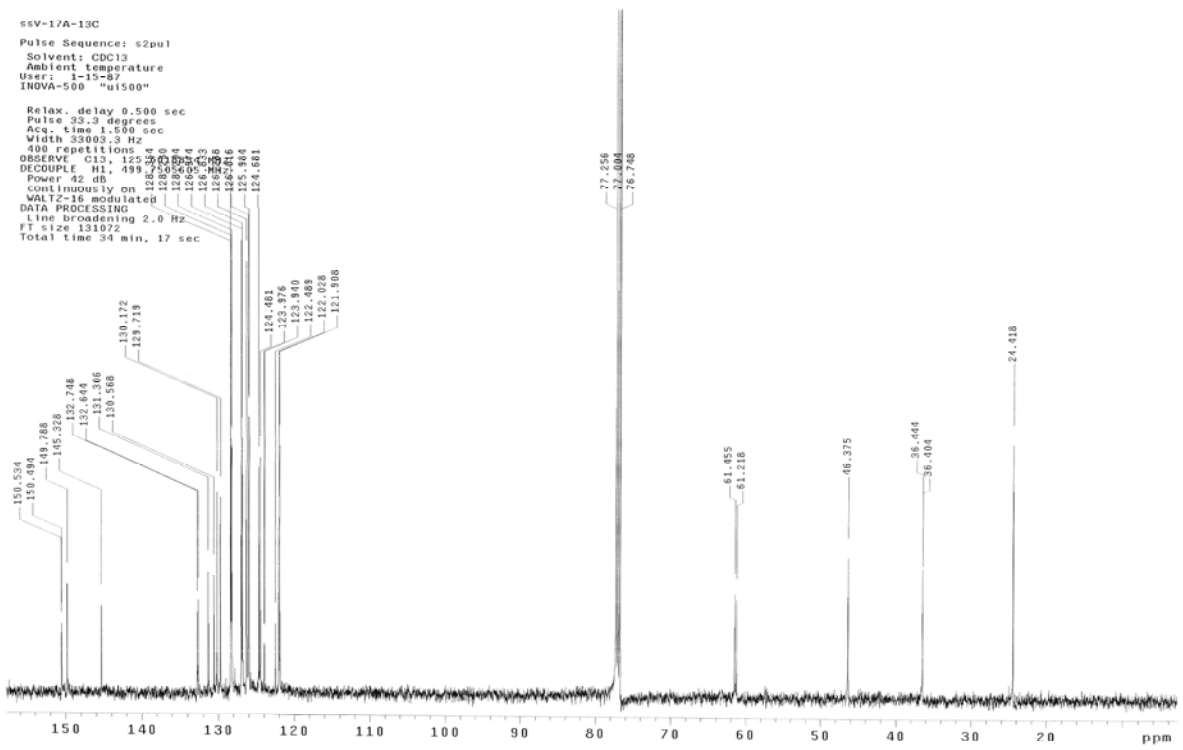

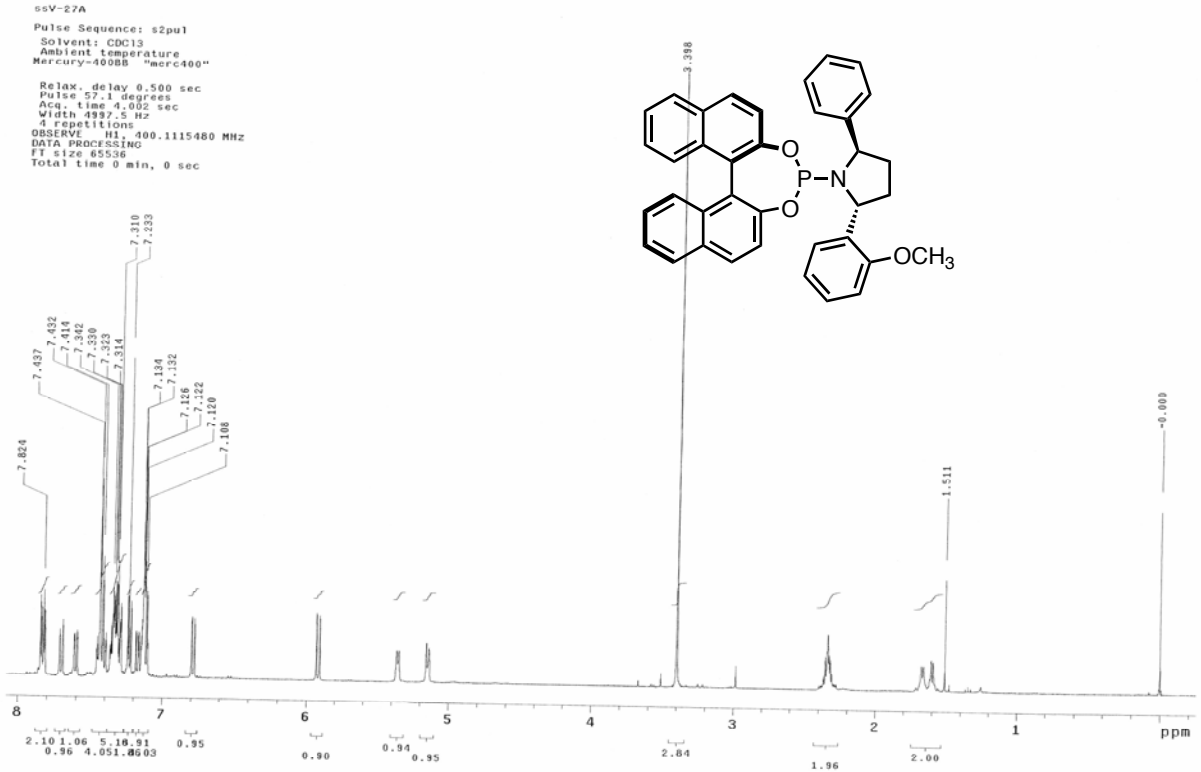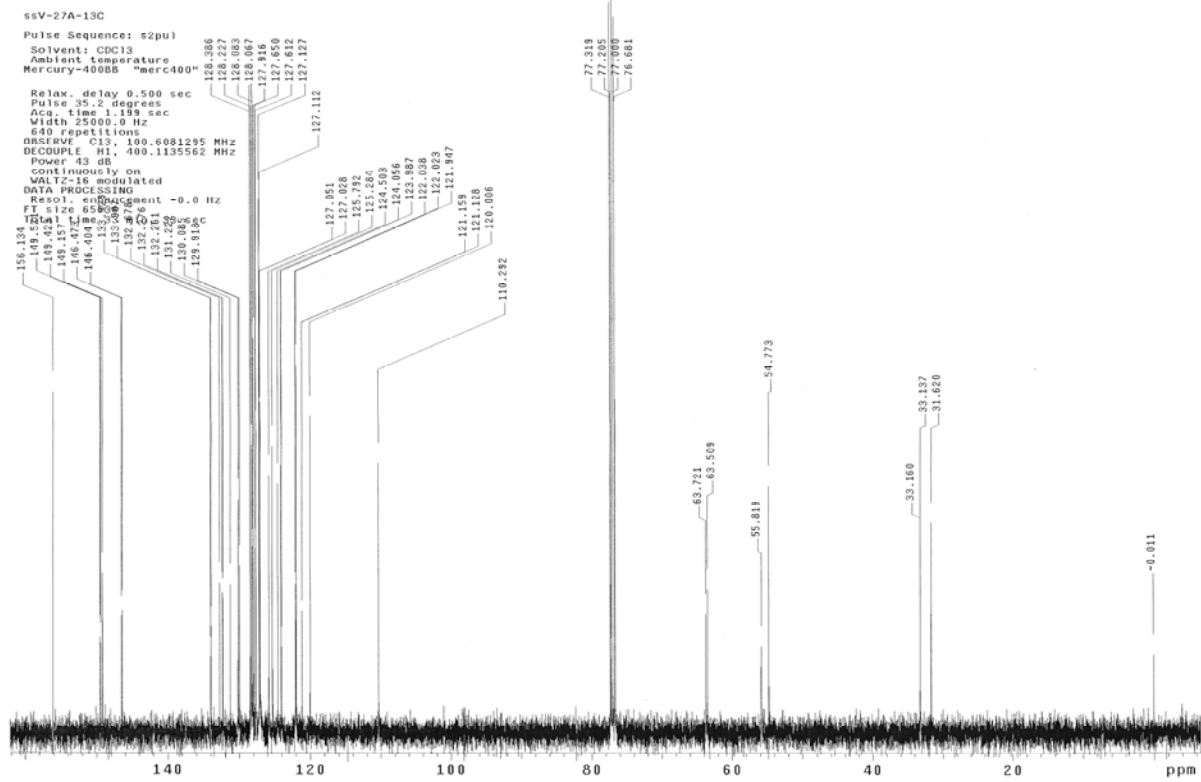



ssv-39  
 Pulse Sequence: s2pu1  
 Solvent: CDCl3  
 Ambient temperature  
 INOVA-500 "ui500"  
 Pulse 29.0 degrees  
 Acq. time 4.000 sec  
 Width 8000.0 Hz  
 16 repetitions  
 OBSERVE H1, 499.7485771 MHz  
 DATA PROCESSING  
 FT size 85536  
 Total time 1 min, 4 sec

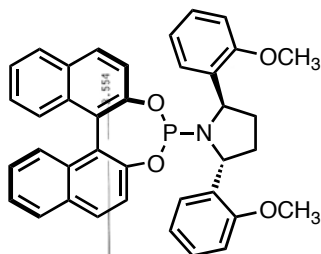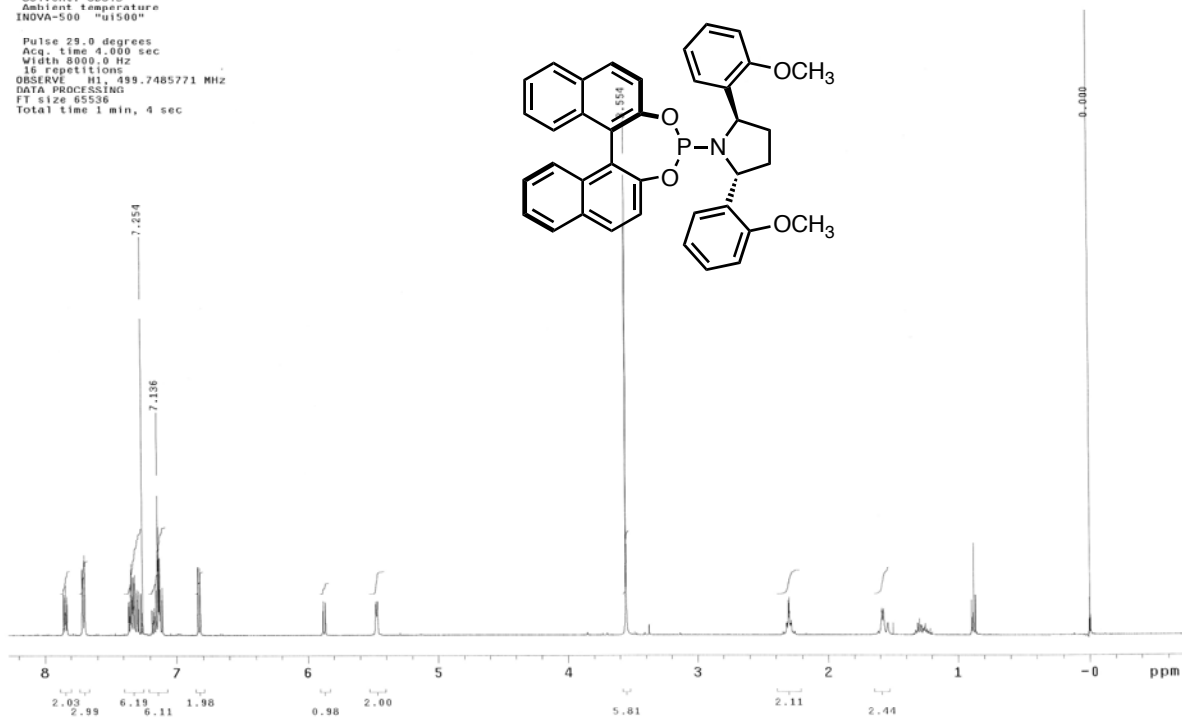

ssv-39-13c  
 Pulse Sequence: s2pu1  
 Solvent: CDCl3  
 Ambient temperature  
 User: 1-15-87  
 INOVA-500 "ui500"  
 Relax. delay 0.500 sec  
 Pulse 37.5 degrees  
 Acq. time 1.500 sec  
 Width 33003.3 Hz  
 1292 repetitions  
 OBSERVE C13, 125.6618813 MHz  
 DECOUPLE H1, 499.7505605 MHz  
 Power 43 dB  
 continuously on  
 WALTZ-16 modulated  
 DATA PROCESSING  
 Line broadening 2.5 Hz  
 FT size 131072  
 Total time 2 hr, 17 min, 8 sec

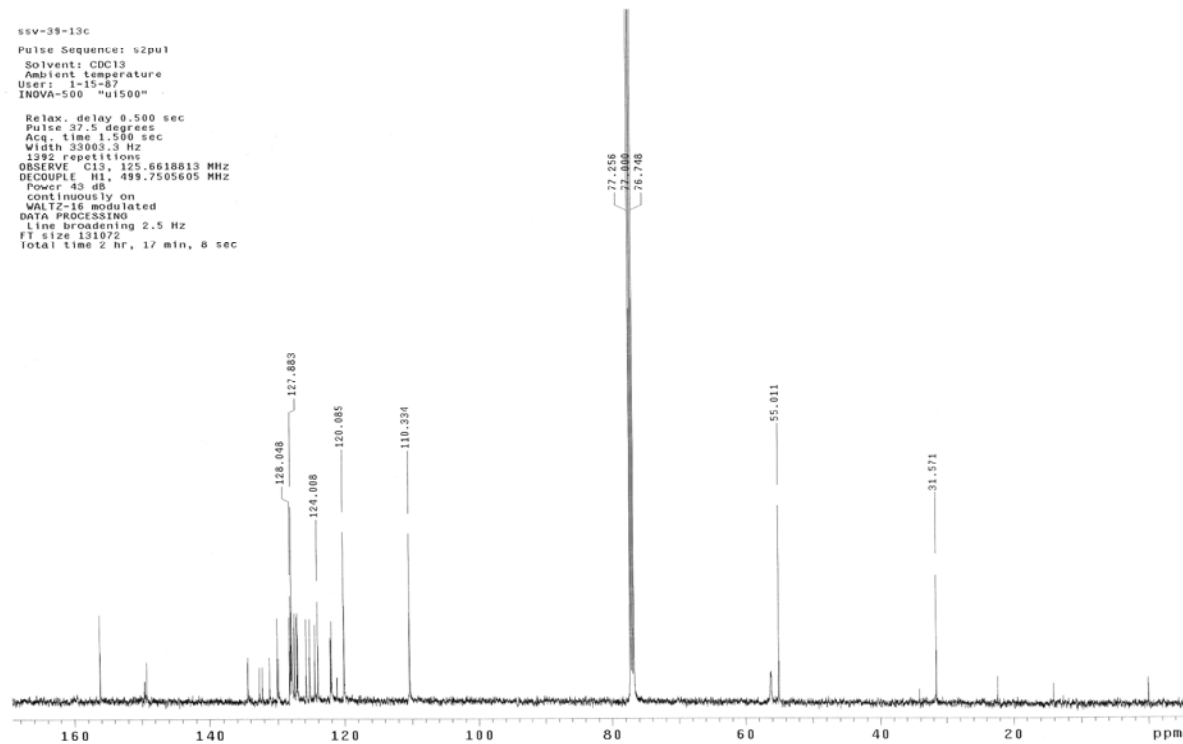







ssxvi-17  
 Pulse Sequence: s2pu1  
 Solvent: CDCl3  
 Ambient Temperature  
 Mercury-400BB "merc400"  
 Relax. delay 0.500 sec  
 Pulse 56.8 degrees  
 Acq. time 4.002 sec  
 Width 4997.5 Hz  
 16 repetitions  
 OBSERVE H1, 400.1115404 MHz  
 DATA PROCESSING  
 FT size 65536  
 Total time 1 min, 22 sec

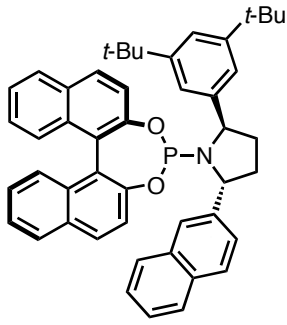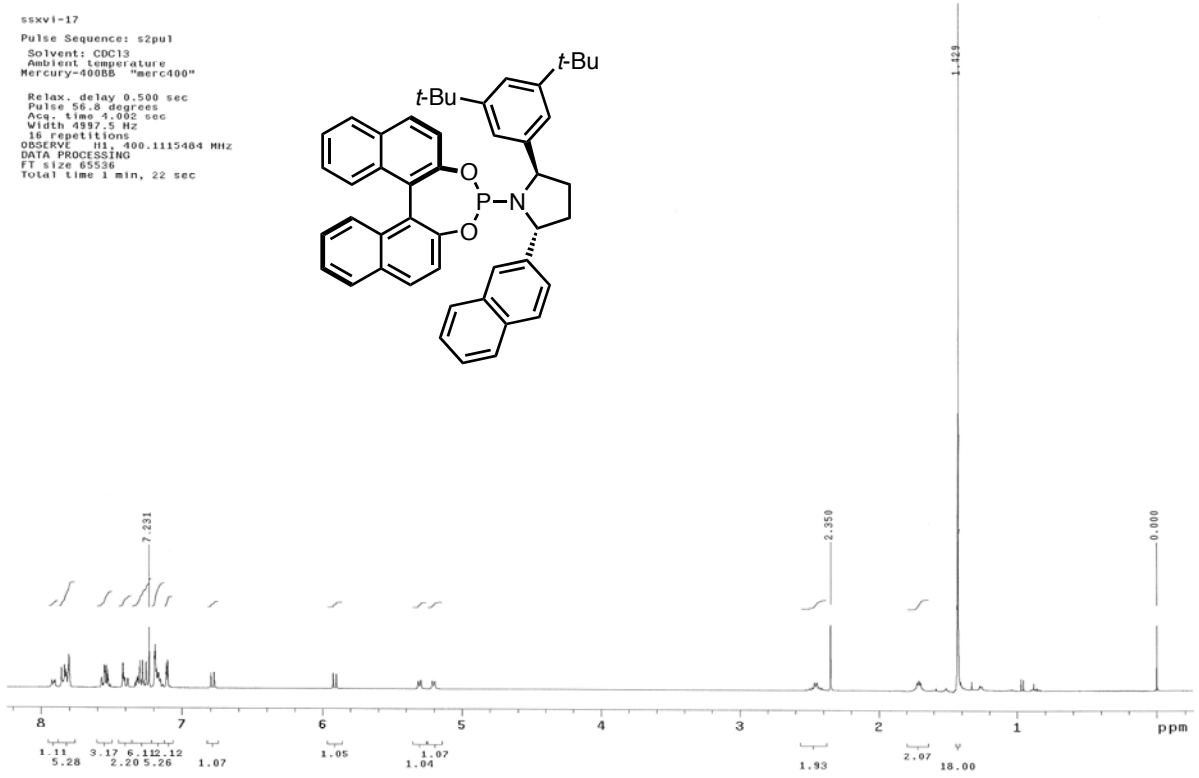

ssxvi-17-13c  
 Pulse Sequence: s2pu1  
 Solvent: CDCl3  
 Ambient Temperature  
 Mercury-400BB "merc400"  
 Relax. delay 0.500 sec  
 Pulse 38.1 degrees  
 Acq. time 1.189 sec  
 Width 25000.0 Hz  
 1536 repetitions  
 OBSERVE C13, 100.6081307 MHz  
 DECOUPLE H1, 400.1135562 MHz  
 Power 43 dB  
 continuously on  
 WALTZ-16 modulated  
 DATA PROCESSING  
 Line broadening 2.0 Hz  
 FT size 65536  
 Total time 74 hr, 18 min, 40 sec

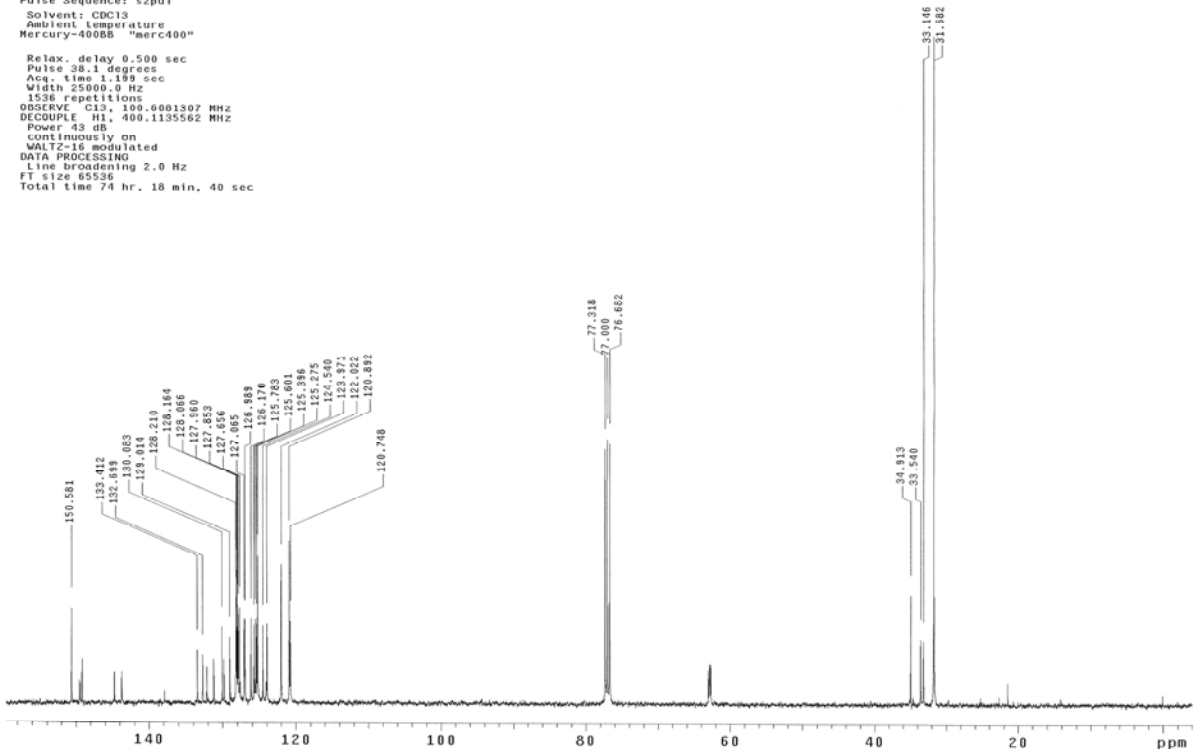

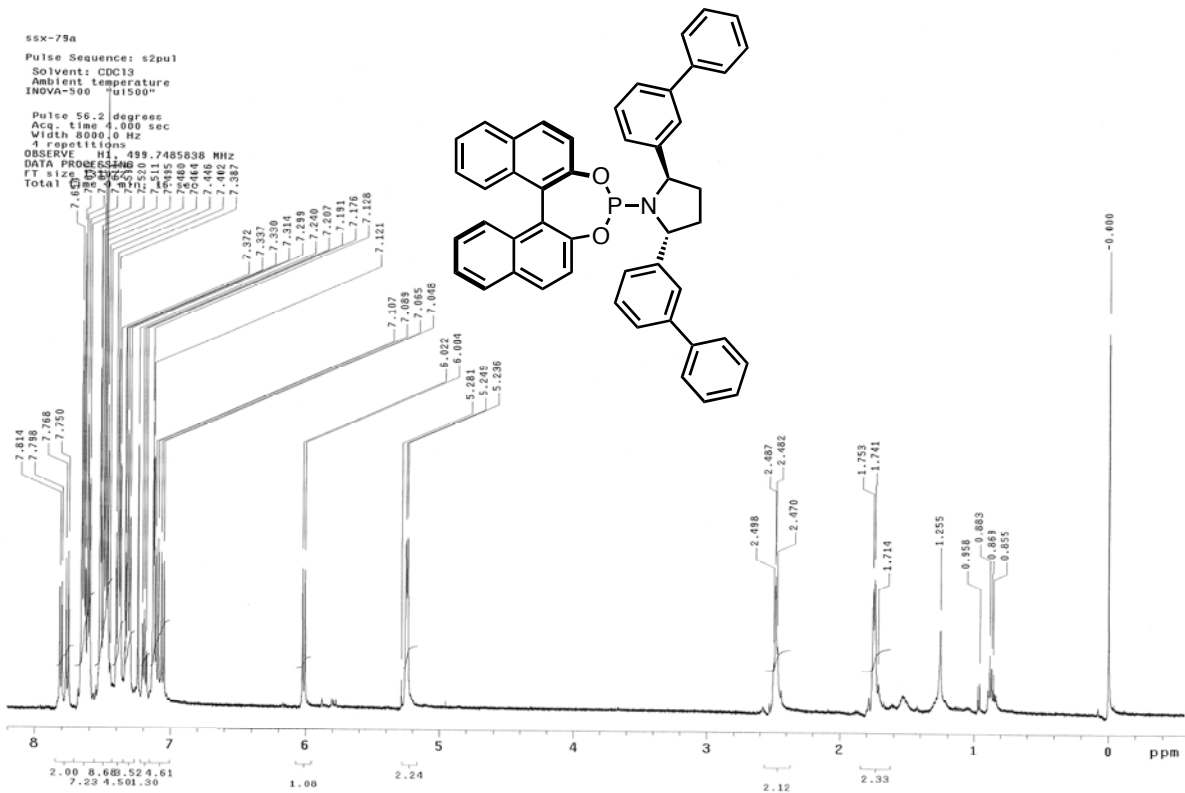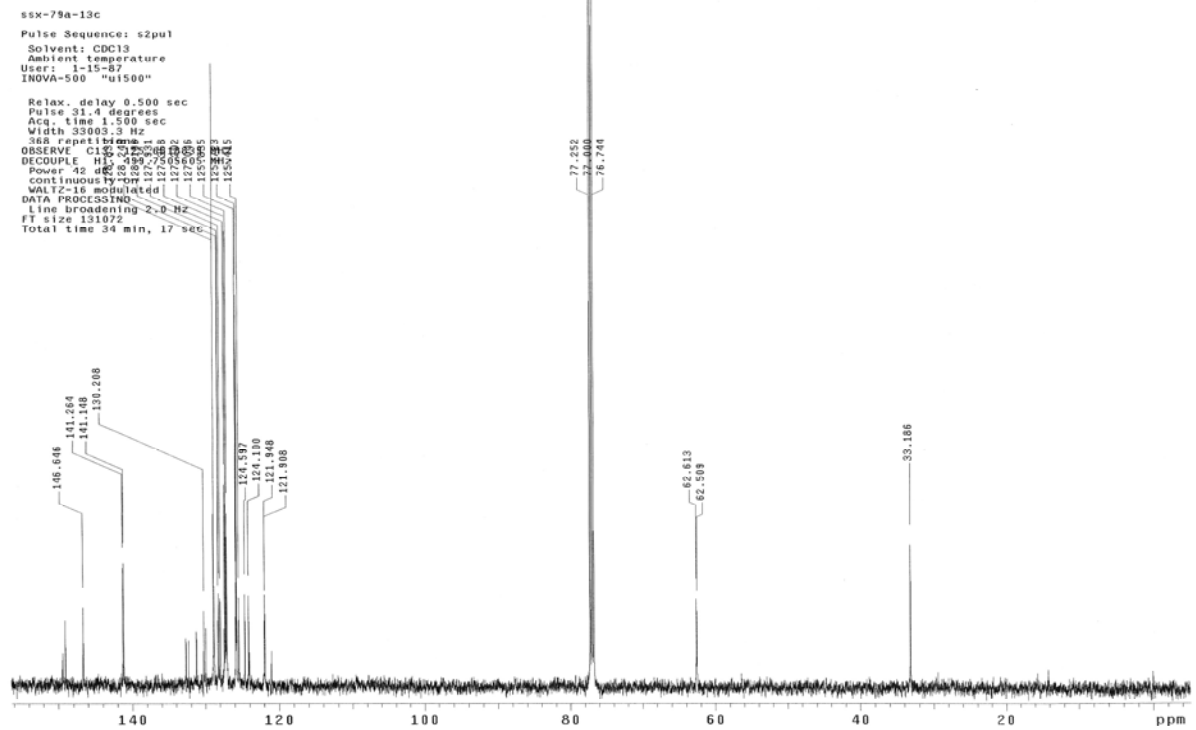



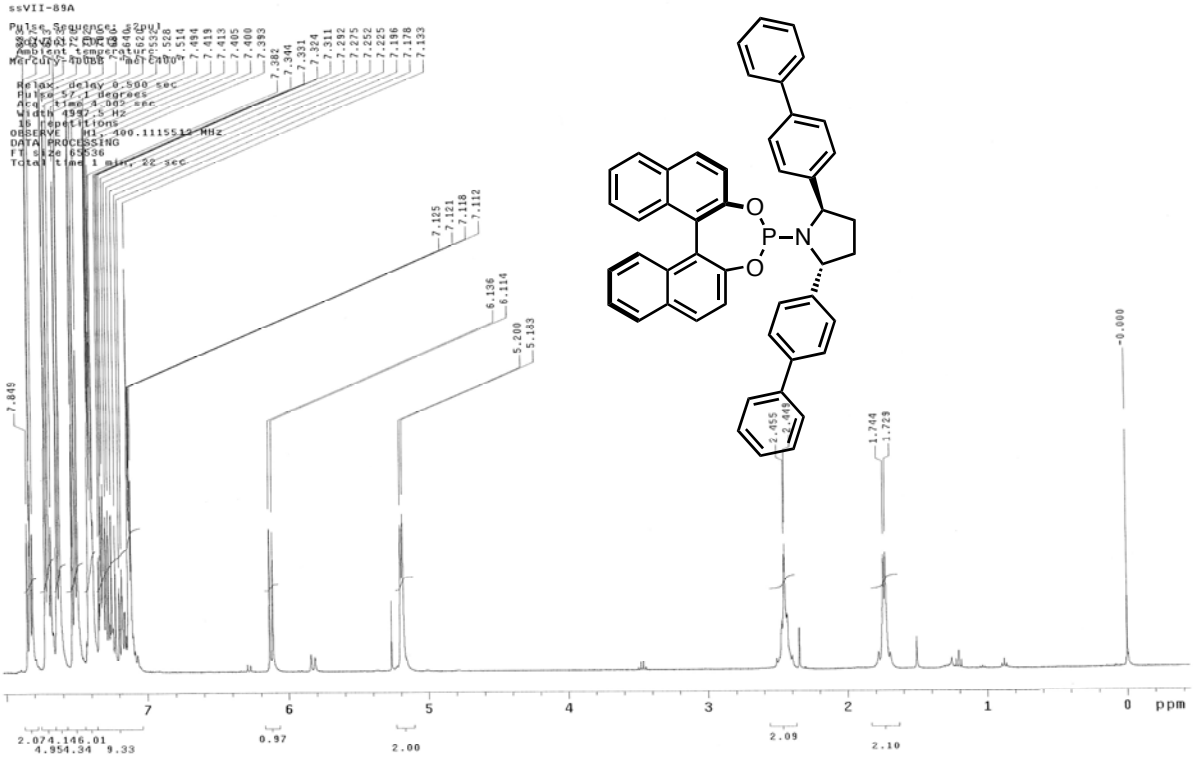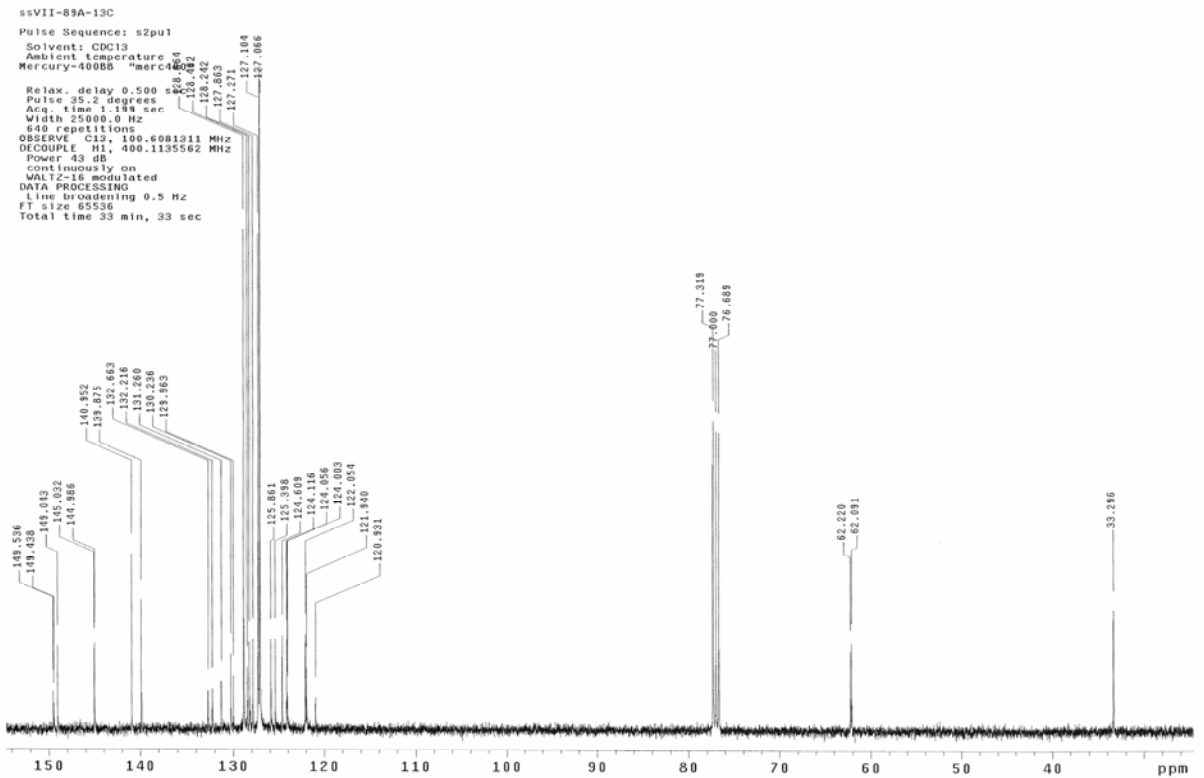

ssix-27a  
 Pulse Sequence: s2pu1  
 Solvent: CDCl3  
 Ambient temperature  
 Mercury-400BB "merc400"

Relax. delay 0.500 sec  
 Pulse 57.1 degrees  
 Acq. time 4.062 sec  
 Width 4997.5 Hz  
 15 repetitions  
 OBSERVE H1, 400.1115429 MHz  
 DATA PROCESSING  
 FT size 85536  
 Total time 1 min, 22 sec

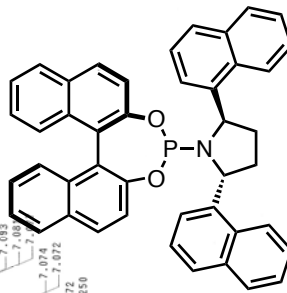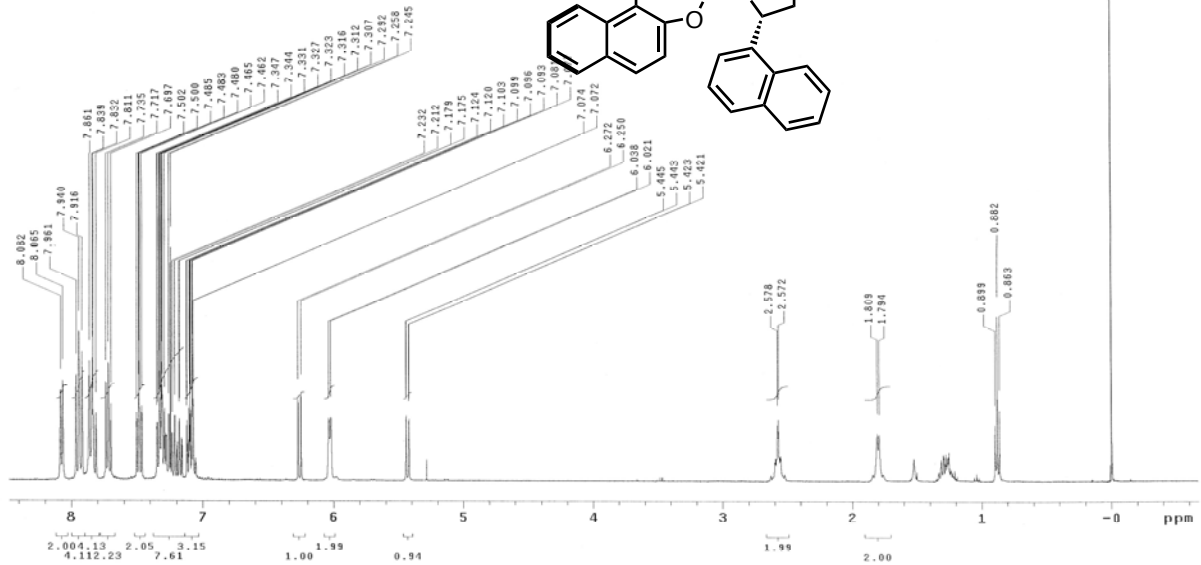

ssix-27a-13c  
 Pulse Sequence: s2pu1  
 Solvent: CDCl3  
 Ambient temperature  
 Mercury-400BB "merc400"

Relax. delay 0.500 sec  
 Pulse 35.2 degrees  
 Acq. time 1.134 sec  
 Width 25000.0 Hz  
 1258 repetitions  
 OBSERVE C13, 100.6200000 MHz  
 DECOUPLE H1, 400.1115429 MHz  
 Power 43 dB  
 Continuously on  
 WALTZ-16 modulated  
 DATA PROCESSING  
 Line broadening 5.0 Hz  
 FT size 85536  
 Total time 5 hr, 27 min, 44 sec

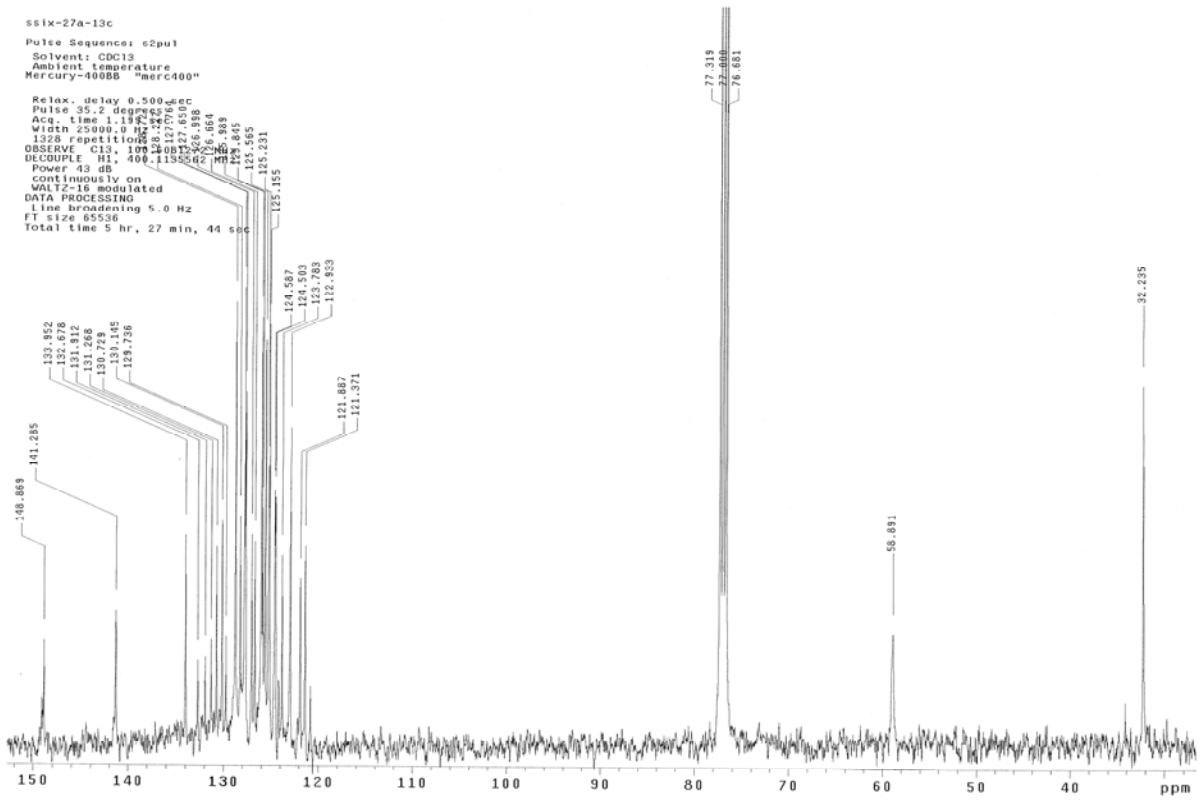

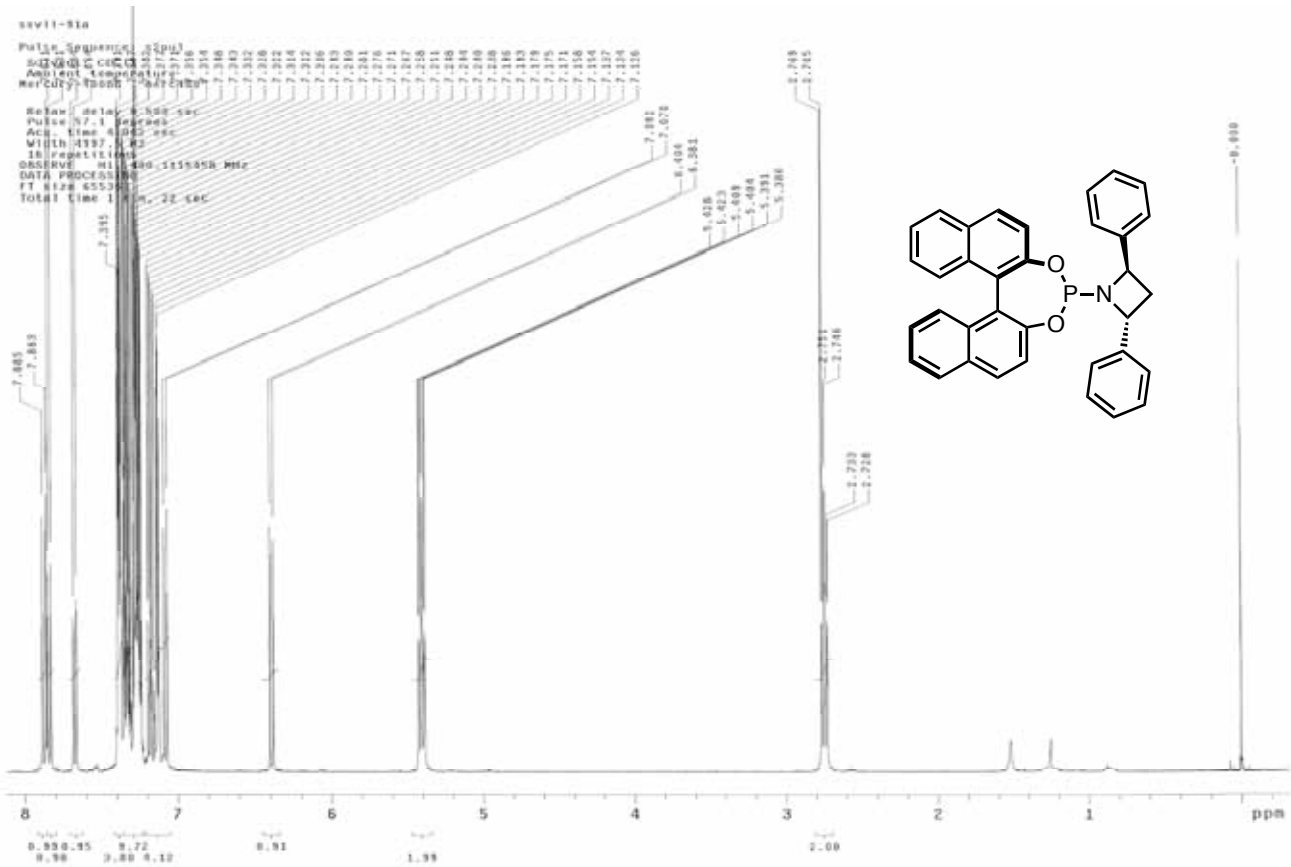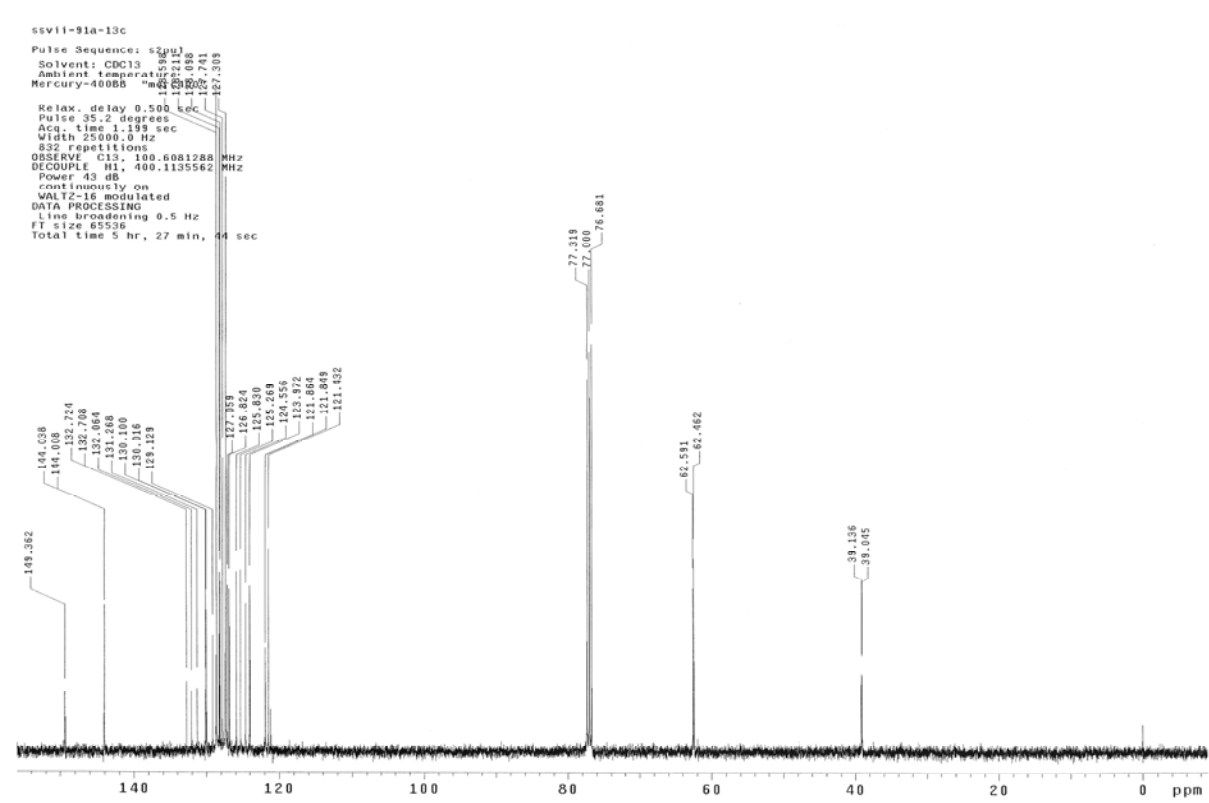

ssVI-43A  
 Pulse Sequence: s2pul  
 Solvent: CDCl3  
 Ambient temperature  
 Mercury-400BB "merc400"

Relax. delay 0.500 sec  
 Pulse 57.1 degrees  
 Acq. time 4.002 sec  
 Width 4937.5 Hz  
 6 repetitions  
 OBSERVE H1, 400.1115356 MHz  
 DATA PROCESSING  
 FT size 85536  
 Total time 0 min, 0 sec

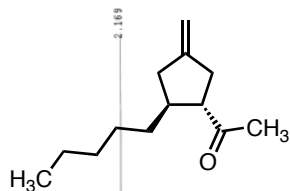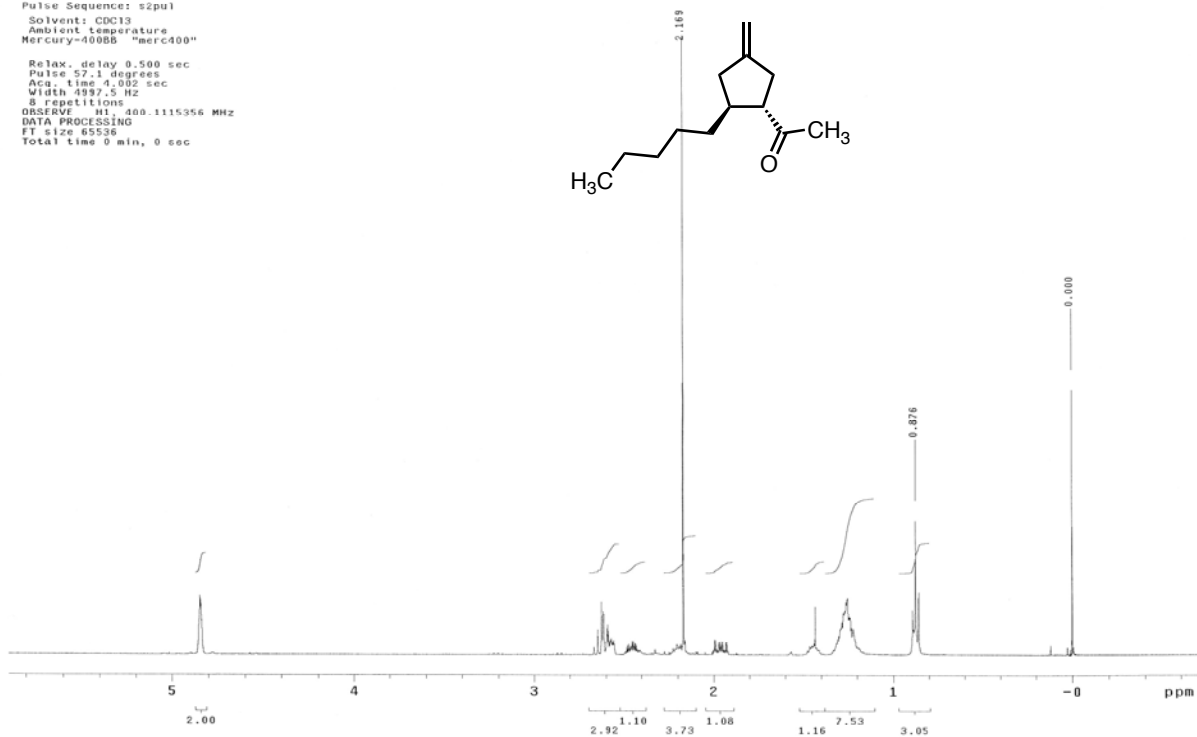

ssVI-43A-13C

Pulse Sequence: s2pul  
 Solvent: CDCl3  
 Ambient temperature  
 Mercury-400BB "merc400"

Relax. delay 0.500 sec  
 Pulse 35.2 degrees  
 Acq. time 1.139 sec  
 Width 25000.0 Hz  
 288 repetitions  
 OBSERVE C13, 100.6081265 MHz  
 DECOUPLE H1, 400.1155562 MHz  
 Power 43 dB  
 Continuously on  
 WALTZ-16 modulated  
 DATA PROCESSING  
 Line broadening 1.0 Hz  
 FT size 85536  
 Total time 33 min, 33 sec

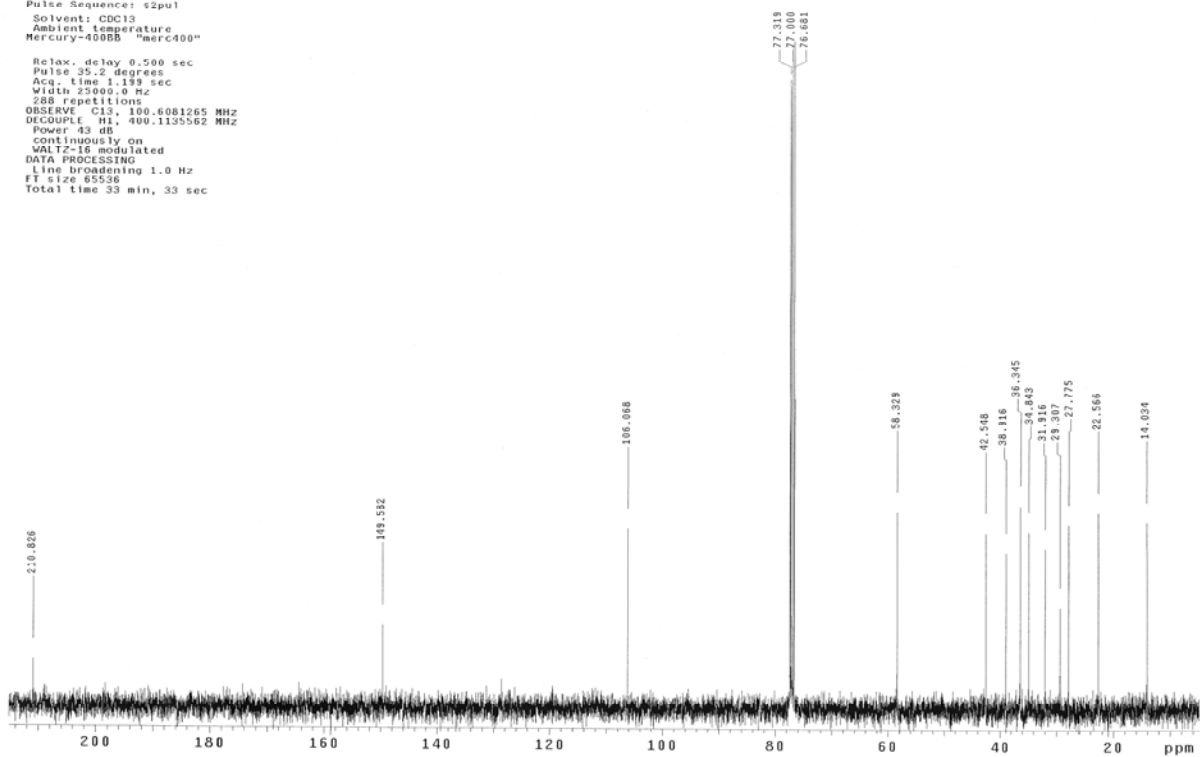



ssVI-25A

Pulse Sequence: s2pu1  
Solvent: CDCl3  
Ambient Temperature  
INNOVA-500 "u1500"

Pulse 88.0 degrees  
Acq. time 4.000 sec  
Width 8000.0 Hz  
18 repetitions  
OBSERVE F1 499.7465784 MHz  
DATA PROCESSING  
FT size 131072  
Total time 34 min, 17 sec

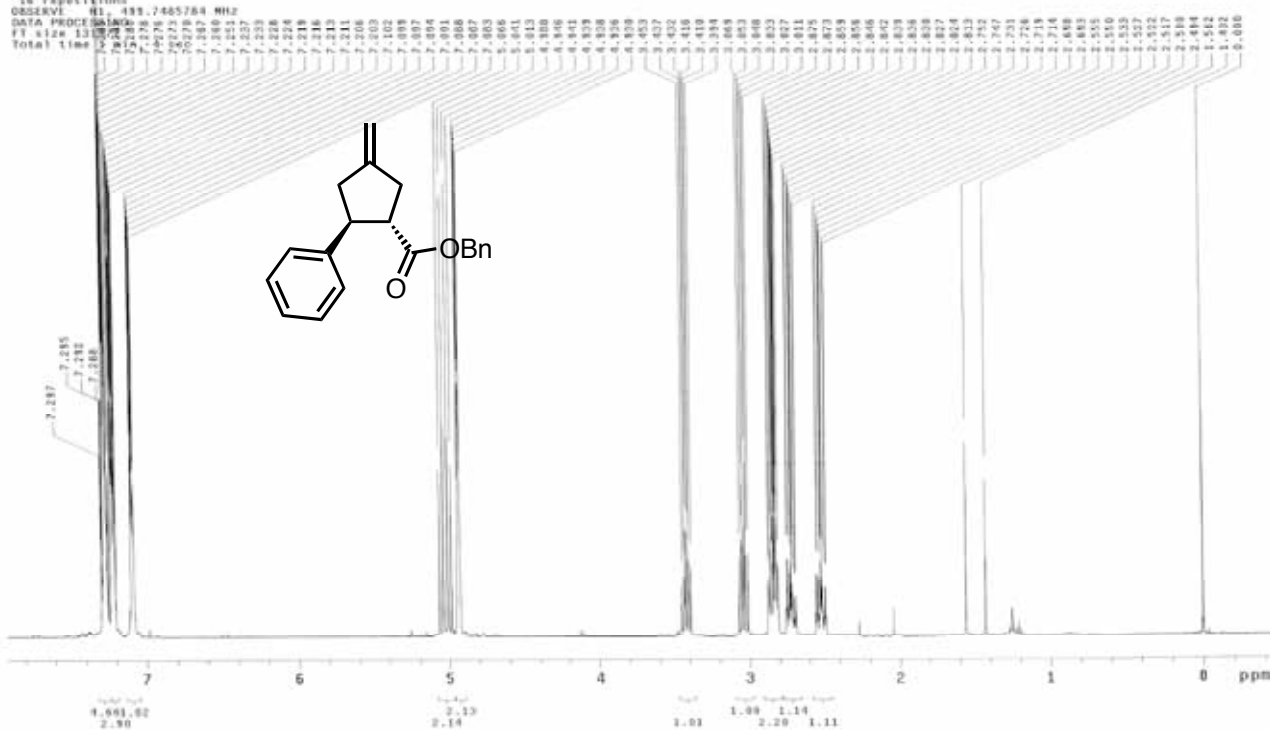

ssVI-25A-13C

Pulse Sequence: s2pu1  
Solvent: CDCl3  
Ambient Temperature  
User: 1-15-07  
INNOVA-500 "u1500"

Relax. delay 0.500 sec  
Pulse 33.3 degrees  
Acq. time 1.500 sec  
Width 33003.3 Hz  
484 repetitions  
OBSERVE F1 125.661829 MHz  
DECOUPLE H1, 499.7505605 MHz  
Power 42 dB  
continuously on  
WALTZ-16 modulated  
DATA PROCESSING  
Line broadening 2.0 Hz  
FT size 131072  
Total time 34 min, 17 sec

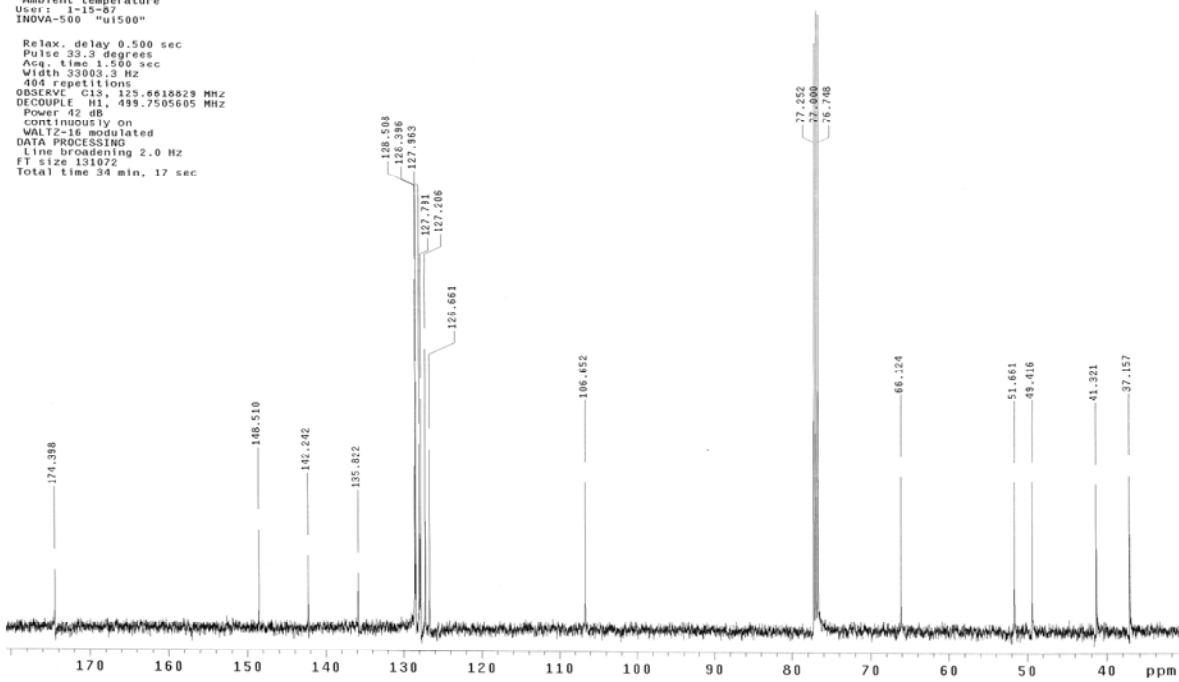

ssVII-72A  
 File: Proton  
 Pulse Sequence: s2pu1  
 Solvent: CDCl3  
 Temp: 25.0 C / 298.1 K  
 Operator: steves1  
 VNMRS-400 "nmr400"

Relax. delay 8.500 sec  
 Pulse 45.0 degrees  
 Acq. time 4.000 sec  
 Width 5605.4 Hz  
 16 repetitions  
 OBSERVE H1, 399.7473877 MHz  
 DATA PROCESSING  
 FT size 45536  
 Total time 1 min, 12 sec.

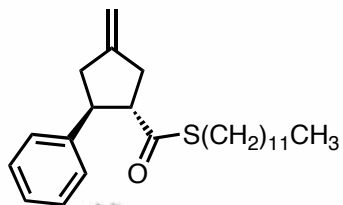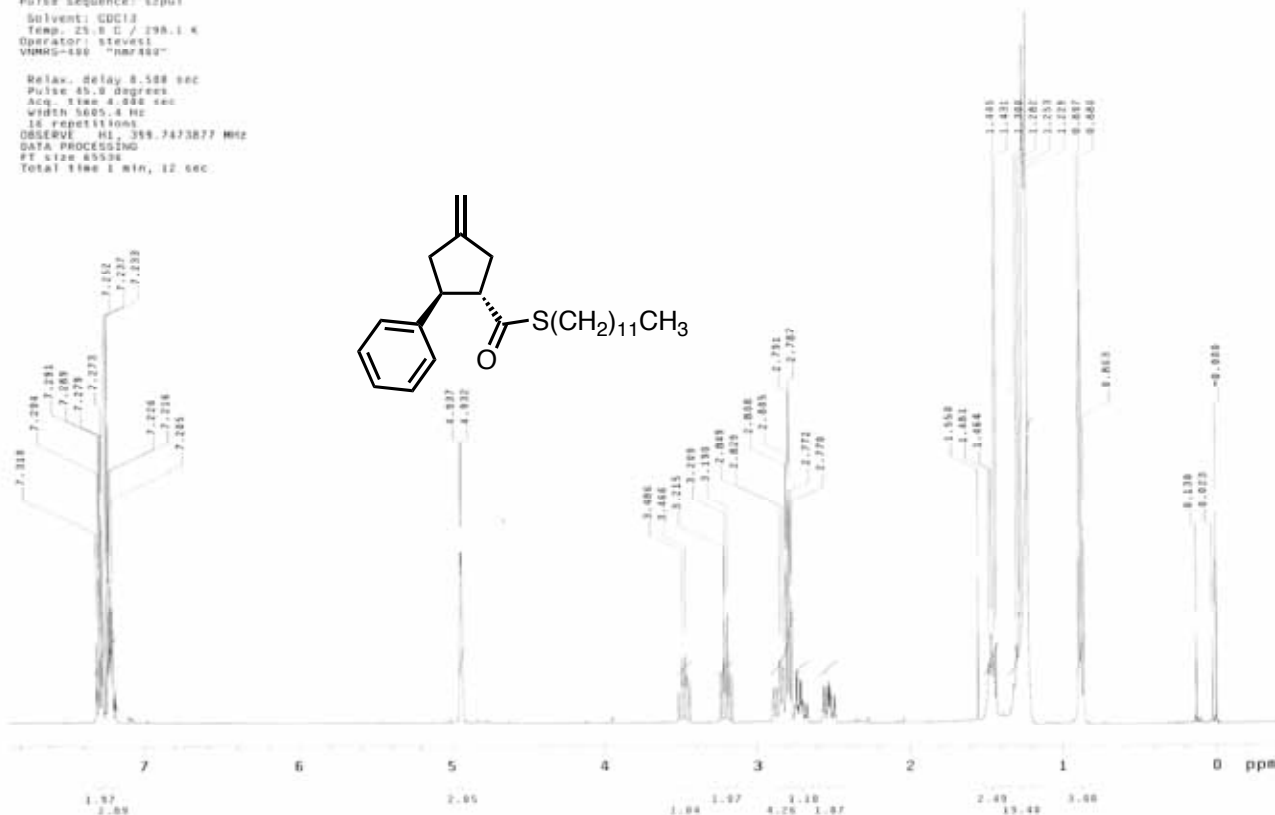

ssVII-72A-13C  
 File: Carbon  
 Pulse Sequence: s2pu1  
 Solvent: CDCl3  
 Temp: 25.0 C / 298.1 K  
 Operator: steves1  
 VNMRS-400 "nmr400"

Relax. delay 1.000 sec  
 Pulse 42.4 degrees  
 Acq. time 1.300 sec  
 Width 24509.8 Hz  
 152 repetitions  
 OBSERVE F13, 100.6165612 MHz  
 DECOUPLE H1, 399.7493842 MHz  
 Power 41 dB  
 continuously on  
 SALTZ-16 modulated  
 DATA PROCESSING  
 Line broadening 1.5 Hz  
 FT size 65536  
 Total time 19 min, 42 sec

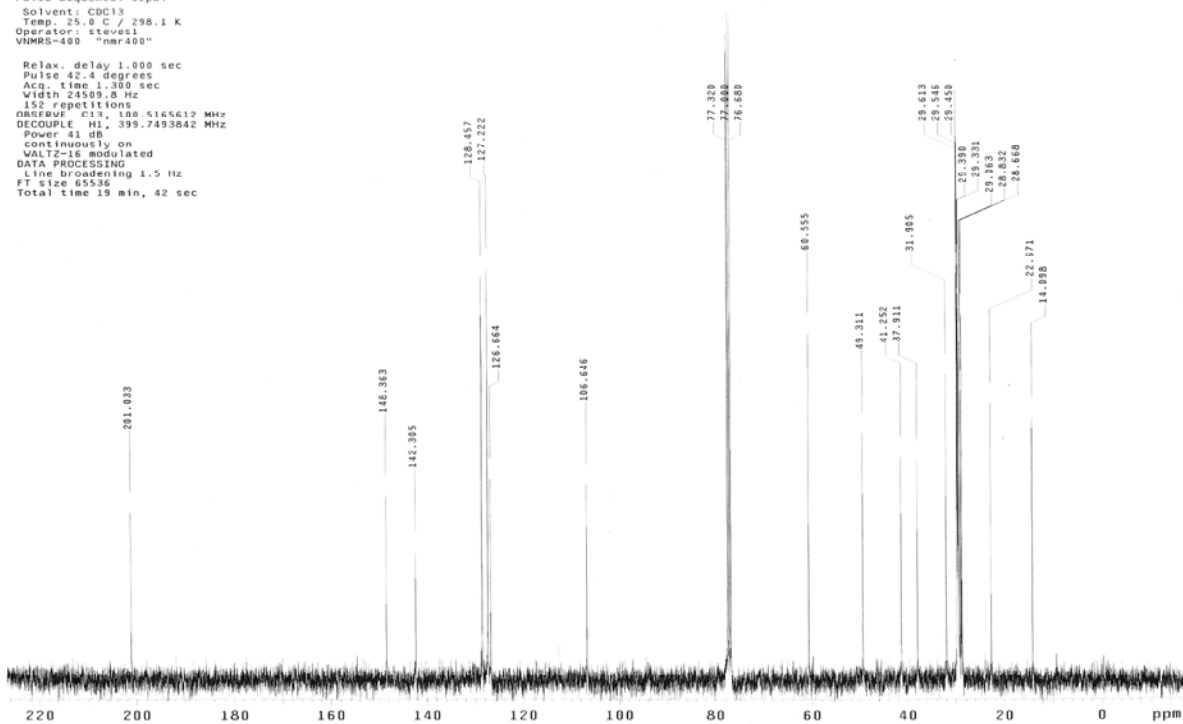

ssVI-19A  
 Pulse Sequence: s2pul  
 Solvent: CDCl3  
 Ambient Temperature  
 INOVA-500 "ui500"  
 Pulse 40.0 degrees  
 Acq. time 4.500 sec  
 Width 8000.0 Hz  
 16 repetitions  
 OBSERVE H1, 499.7465730 MHz  
 DATA PROCESSING  
 FT size 131072  
 Total time 1 min, 4 sec

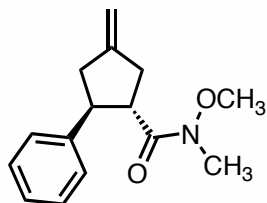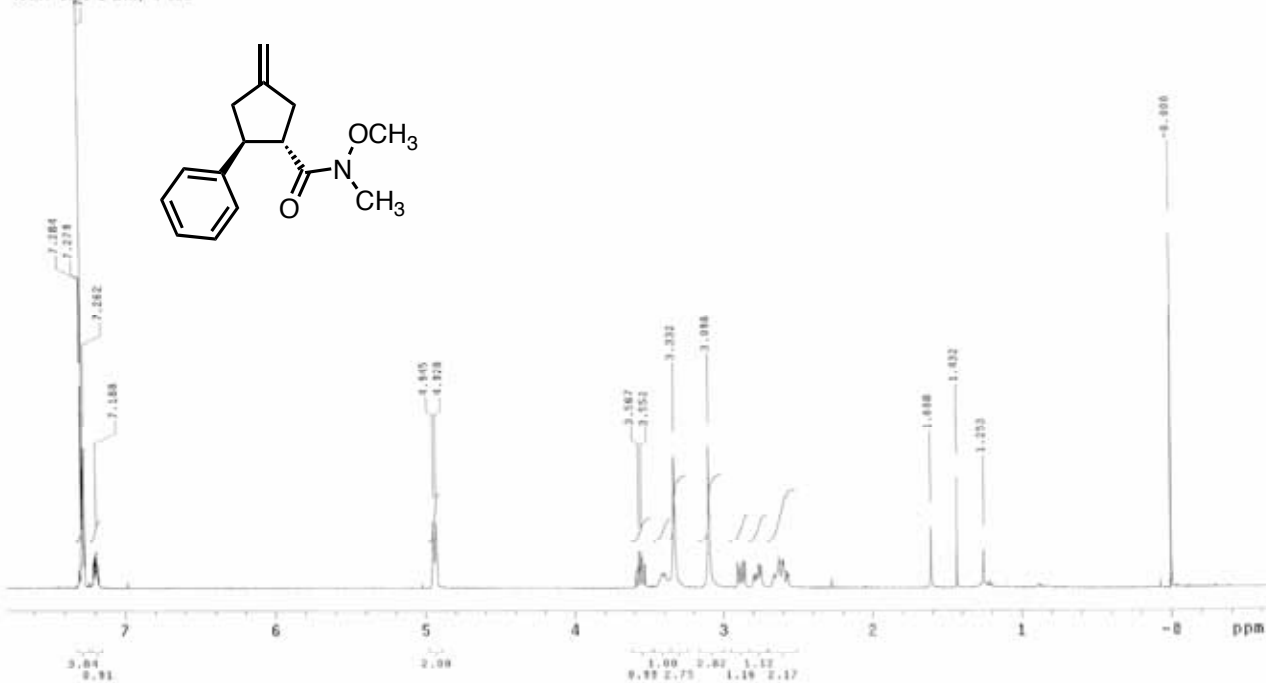

ssVI-19A-19C  
 Pulse Sequence: s2pul  
 Solvent: CDCl3  
 Ambient temperature  
 User: 1-15-87  
 INOVA-500 "ui500"  
 Relax. delay 0.500 sec  
 Pulse 33.3 degrees  
 Acq. time 1.500 sec  
 Width 33003.3 Hz  
 1000 repetitions  
 OBSERVE C13, 125.6618013 MHz  
 DECOUPLE H1, 499.7505605 MHz  
 Power 42 dB  
 continuously on  
 WALTZ-16 modulated  
 DATA PROCESSING  
 Line broadening 1.5 Hz  
 FT size 131072  
 Total time 1 hr, 8 min, 34 sec

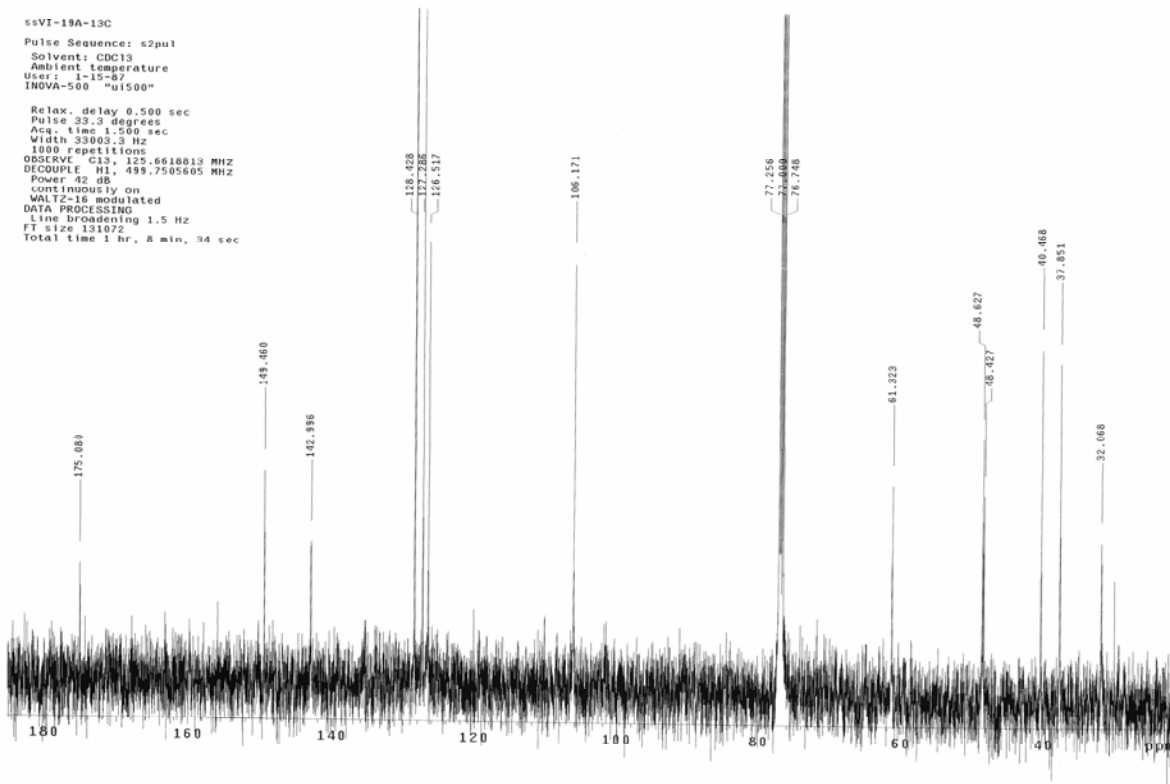

ssVI-17A  
 Pulse Sequence: s2pul  
 Solvent: CDCl3  
 Temp: 23.0 C / 296.1 K  
 Mercury-400BB "merc400"  
 Relax. delay 0.500 sec  
 Pulse 57.1 degrees  
 Acq. time 4.002 sec  
 Width 4937.5 Hz  
 18 repetitions  
 OBSERVE F1, 400.1115378 MHz  
 DATA PROCESSING  
 FT size 85528  
 Total time 0 min, 0 sec

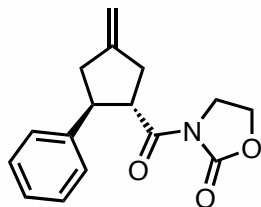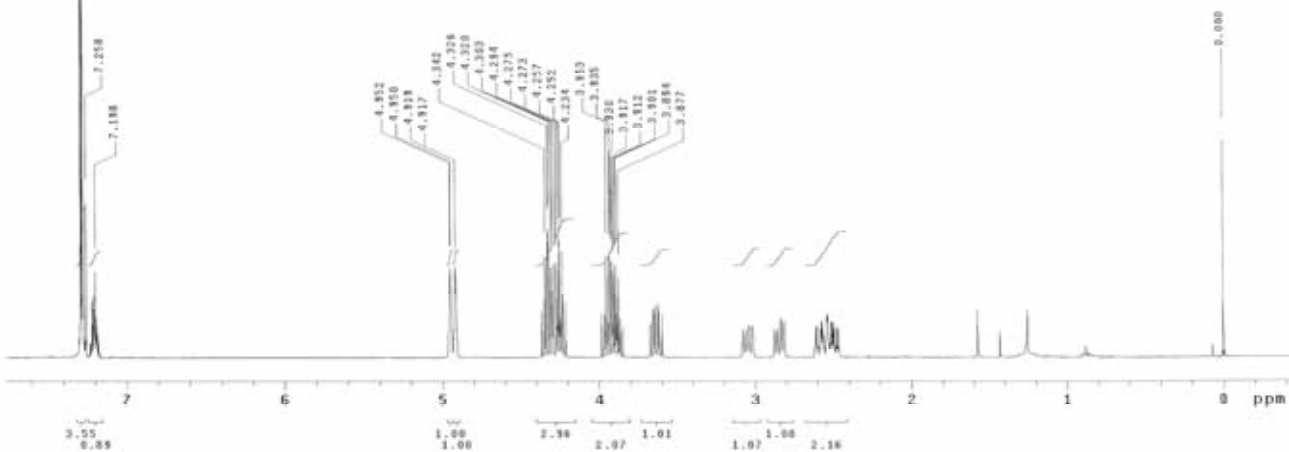

ssVI-17A-13C  
 Pulse Sequence: s2pul  
 Solvent: CDCl3  
 Temp: 23.0 C / 296.1 K  
 Mercury-400BB "merc400"  
 Relax. delay 0.500 sec  
 Pulse 35.2 degrees  
 Acq. time 1.199 sec  
 Width 25000.0 Hz  
 272 repetitions  
 OBSERVE G13, 100.6081288 MHz  
 DECOUPLE H1, 400.1135562 MHz  
 Power 43 dB  
 Continuously on  
 WALTZ-16 modulated  
 DATA PROCESSING  
 Line broadening 1.0 Hz  
 FT size 65536  
 Total time 33 min, 33 sec

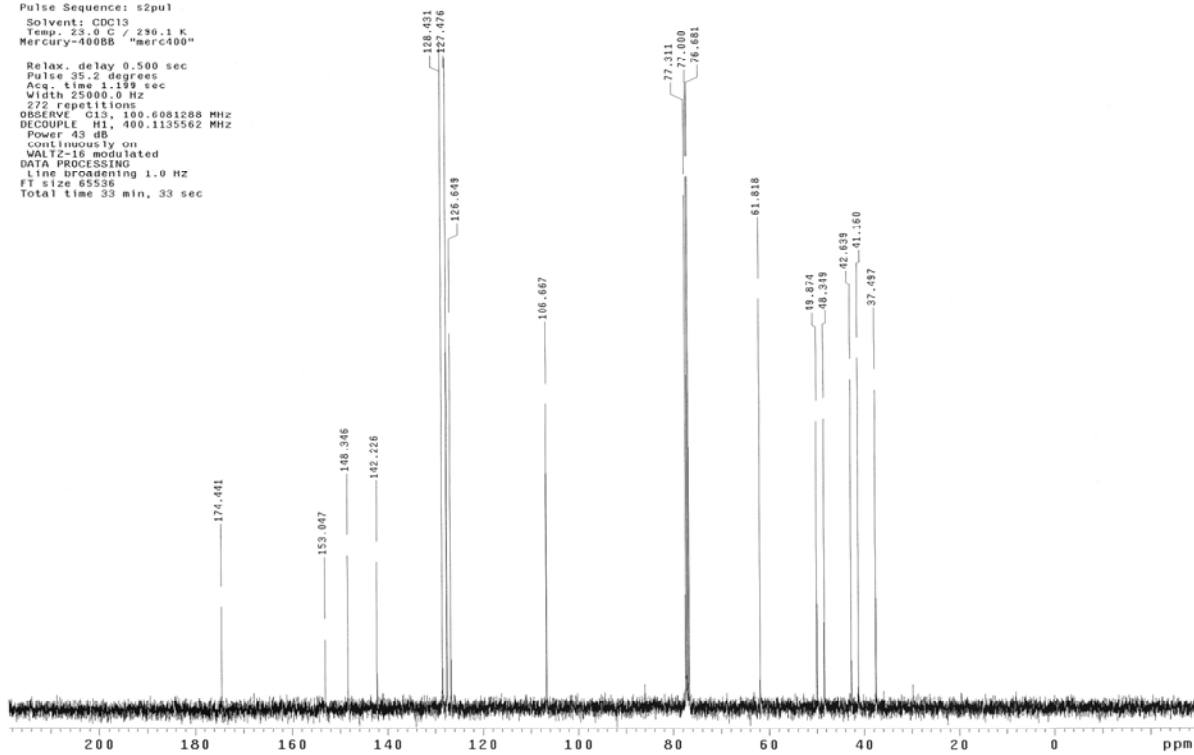

ssVI-20A  
 Pulse Sequence: s2pul  
 Solvent: CDCl3  
 Ambient temperature  
 Mercury-400BB "merc400"  
 Relax. delay 0.500 sec  
 Pulse 57.1 degrees  
 Acq. time 4.002 sec  
 Width 4987.5 Hz  
 64 repetitions  
 OBSERVE N1, 400.1115345 MHz  
 DATA PROCESSING  
 FT size 65536  
 Total time 5 min, 31 sec

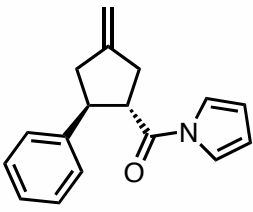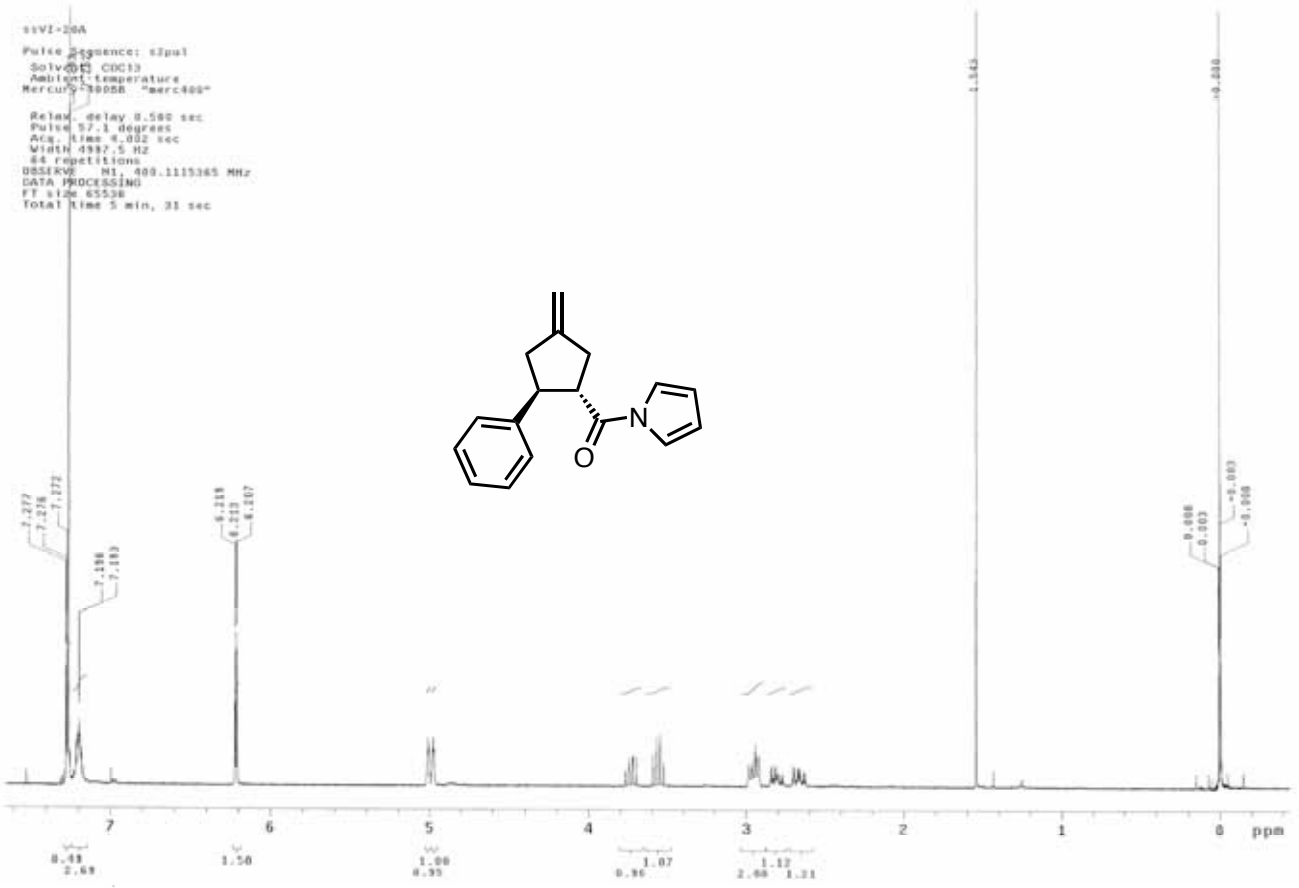

ssVI-21A-13C  
 Pulse Sequence: s2pul  
 Solvent: CDCl3  
 Ambient temperature  
 Mercury-400BB "merc400"  
 Relax. delay 0.500 sec  
 Pulse 35.2 degrees  
 Acq. time 1.159 sec  
 Width 25000.0 Hz  
 336 repetitions  
 OBSERVE C13, 100.6081280 MHz  
 DECOUPLE N1, 400.1135562 MHz  
 Power 43 dB  
 Continuously on  
 WALTZ-16 modulated  
 DATA PROCESSING  
 Line broadening 2.0 Hz  
 FT size 65536  
 Total time 33 min, 33 sec

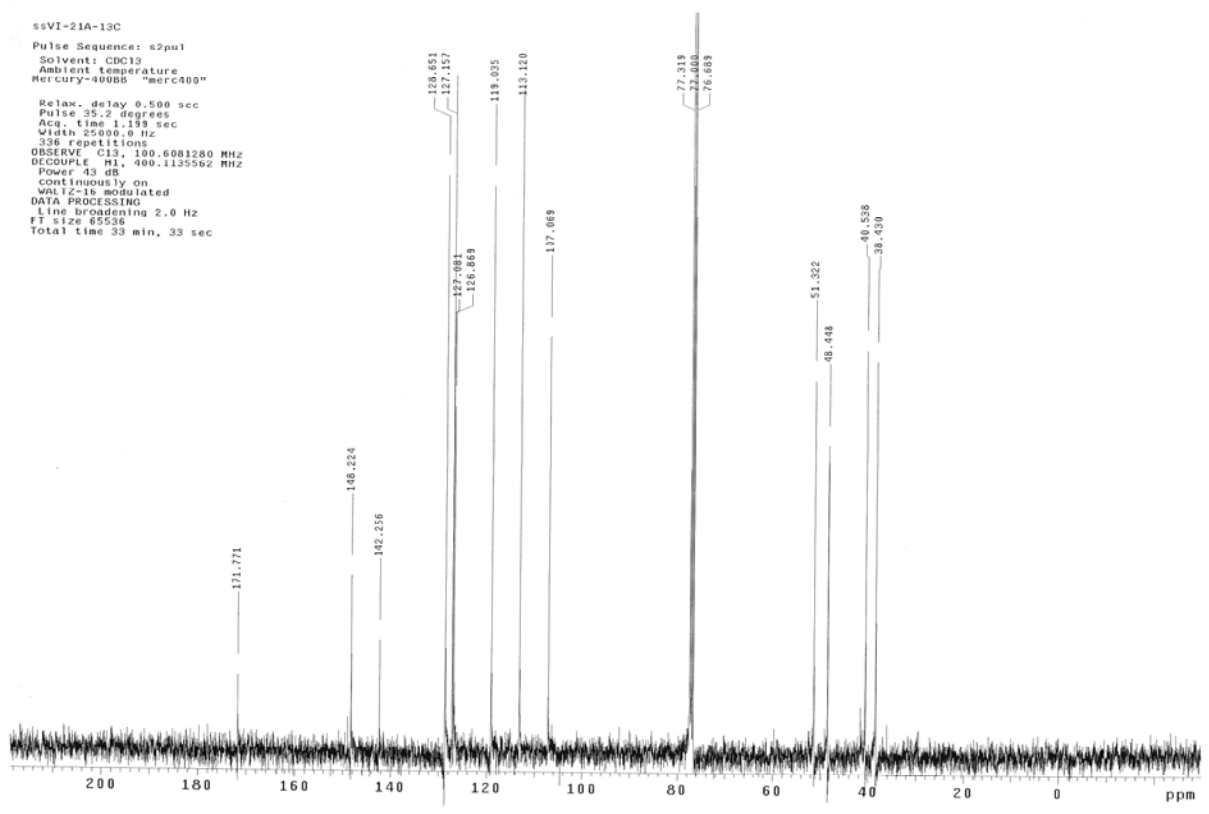

ssVII-54A

Pulse Sequence: s2pu1

Solvent: CDCl3

Ambient temperature

Mercury-400BB "merc400"

Relax. delay 8.000 sec

Pulse width 12.000 usec

Acq. time 1.592 sec

Width 25000.0 Hz

18 repetitions

OBSERVE F1 400.1115406 MHz

DATA PROCESSING

FT size 65536

Total time 9 min, 0 sec

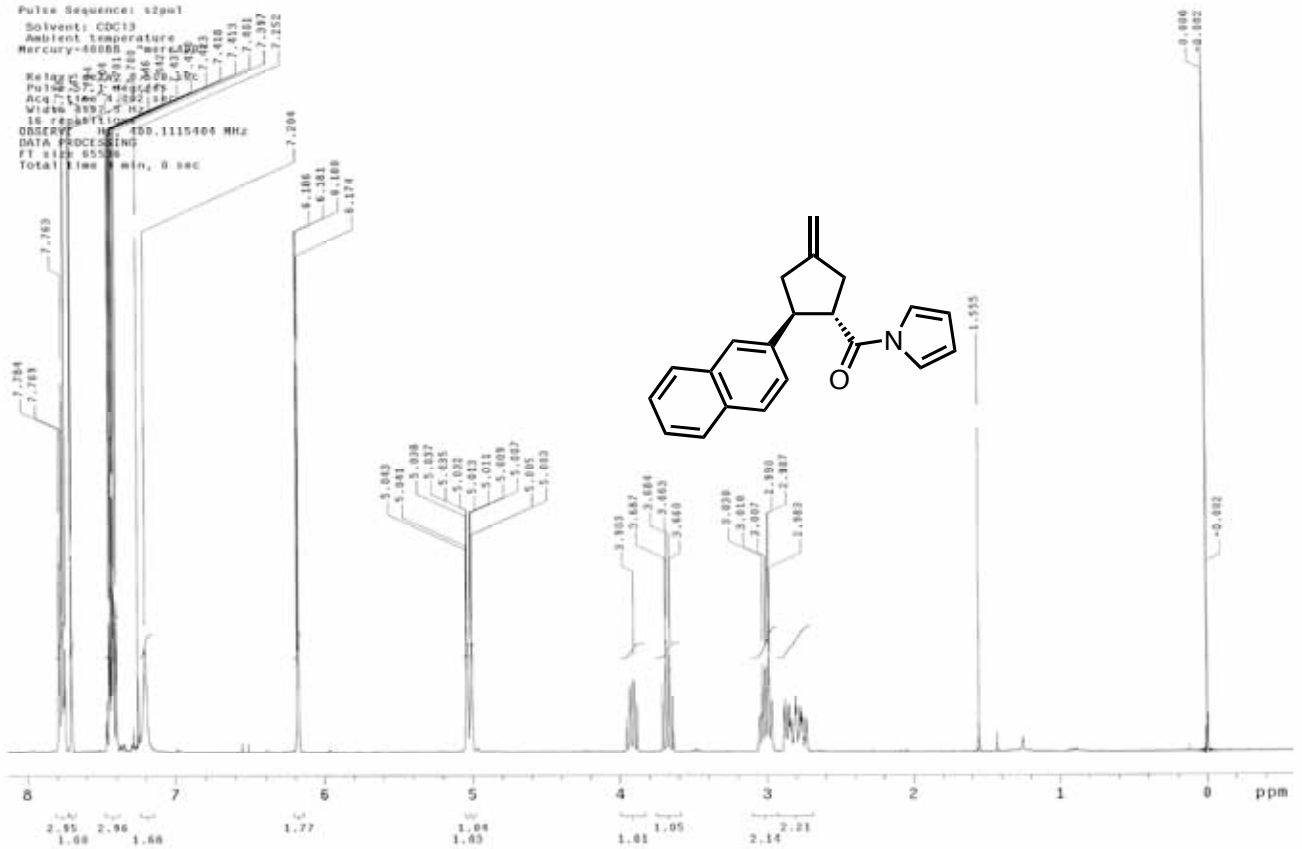

ssVII-54A-13C

Pulse Sequence: s2pu1

Solvent: CDCl3

Ambient temperature

Mercury-400BB "merc400"

Relax. delay 0.500 sec

Pulse 35.2 degrees

Acq. time 1.199 sec

Width 25000.0 Hz

368 repetitions

OBSERVE C13 100.6081288 MHz

DECOUPLE H1 400.1135562 MHz

Power 43 dB

continuously on

WALTZ-16 modulated

DATA PROCESSING

Line broadening 1.0 Hz

FT size 65536

Total time 1 hr, 7 min, 7 sec

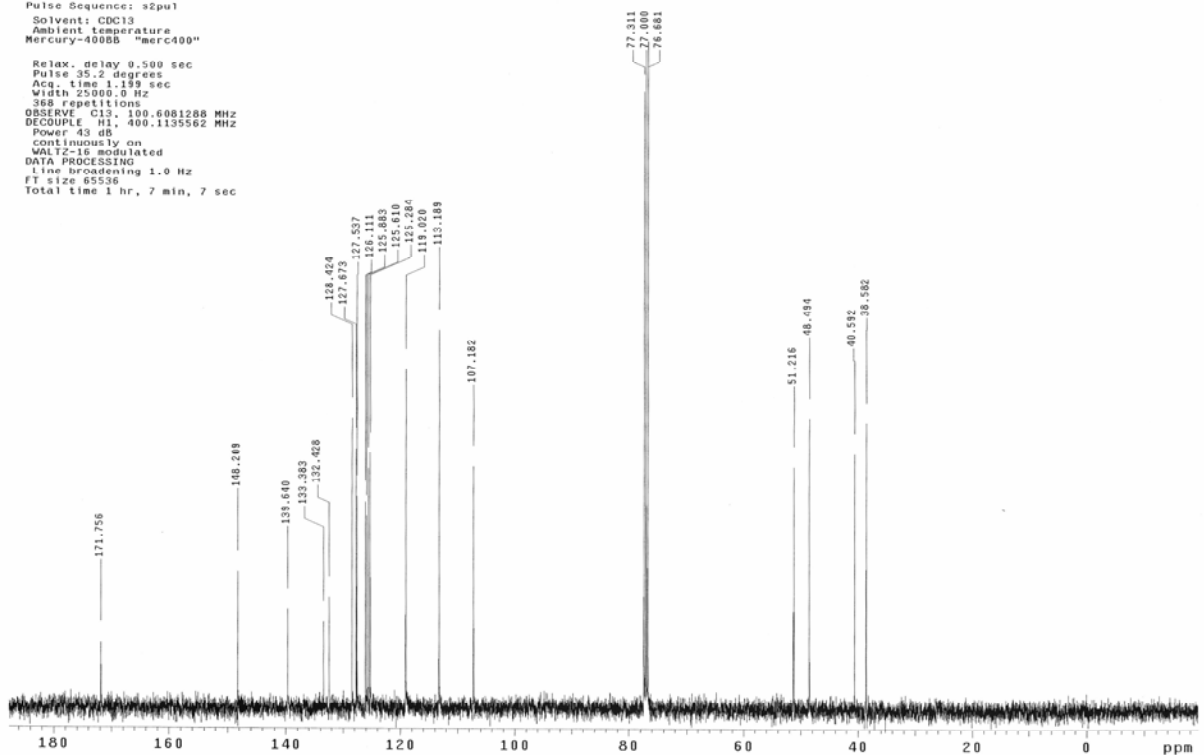



ssvii-80a  
 Pulse Sequence: s2pul  
 Solvent: CDCl3  
 Ambient temperature  
 Mercury-40005 "merc400"

Relax. delay 0.500 sec  
 Pulse 57.1 degrees  
 Acq. time 4.902 sec  
 Width 4397.5 Hz  
 4 repetitions  
 OBSERVE H1 400.1115402 MHz  
 DATA PROCESSING  
 FT size 8558  
 Total time 0 min, 0 sec

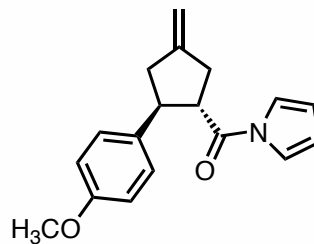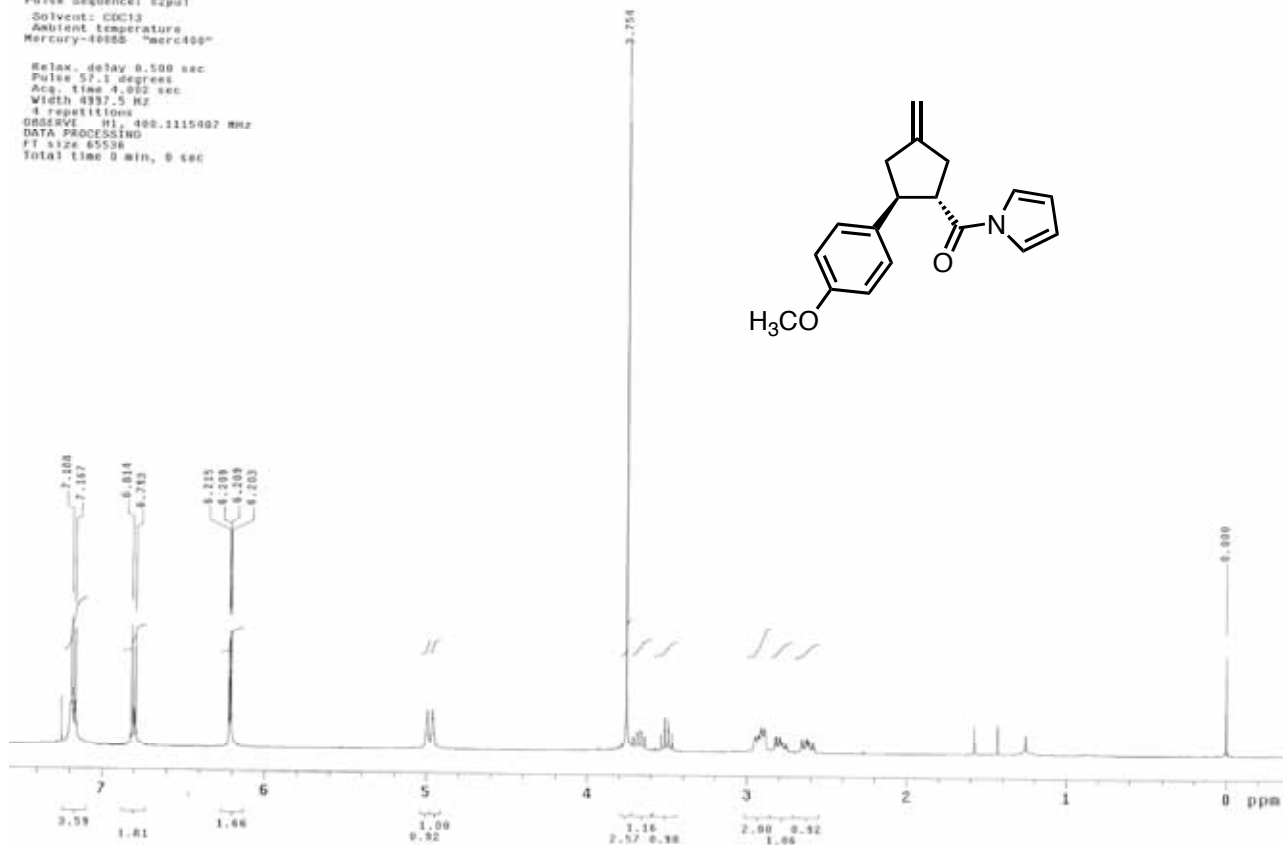

ssvii-80a-13c  
 Pulse Sequence: s2pul  
 Solvent: CDCl3  
 Ambient temperature  
 Mercury-40005 "merc400"

Relax. delay 0.500 sec  
 Pulse 35.2 degrees  
 Acq. time 1.199 sec  
 Width 25000.0 Hz  
 320 repetitions  
 OBSERVE C13 100.6081280 MHz  
 DECOUPLE H1 400.1135562 MHz  
 Power 43 dB  
 Continuously on  
 WALTZ-16 modulated  
 DATA PROCESSING  
 Line broadening 1.0 Hz  
 FT size 65536  
 Total time 33 min, 33 sec

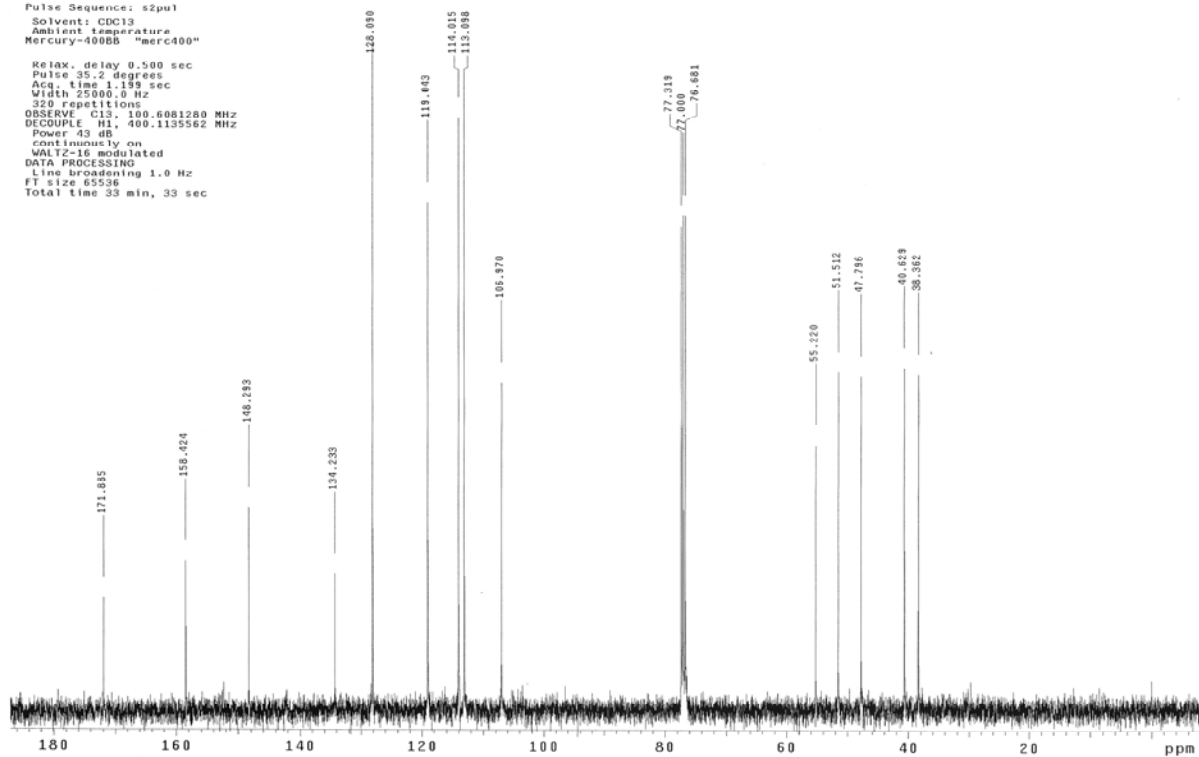



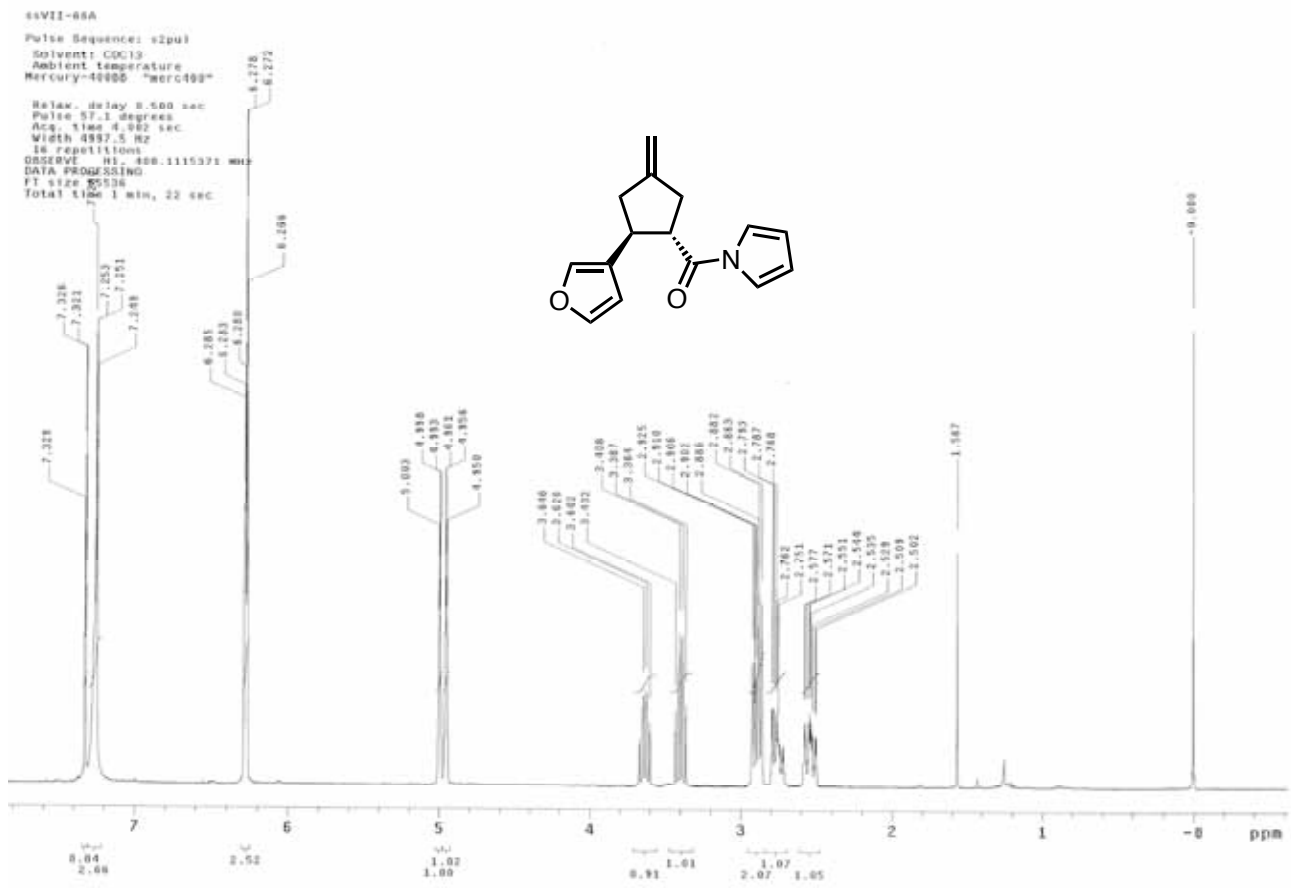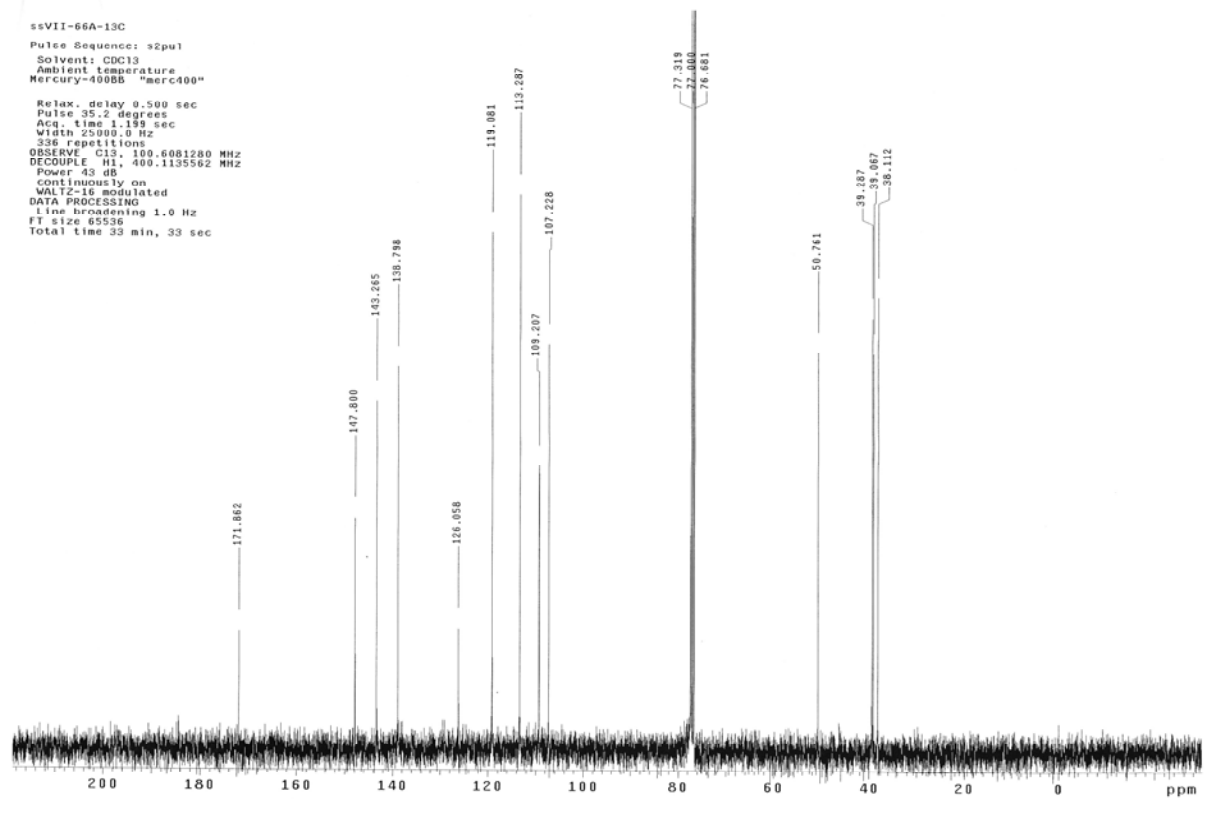

VIII-79A

STANDARD 1H OBSERVE

Pulse Sequence: s2pul  
Solvent: CDCl3  
Ambient temperature  
Mercury-400BB "merc400"

Relax. delay 8.580 sec  
Pulse 57.1 degrees  
Acq. time 4.932 sec  
Width 8997.5 Hz  
16 repetitions  
OBSERVE H1, 400.1115375 MHz  
DATA PROCESSING  
FT size 65536  
Total time 8 min, 8 sec

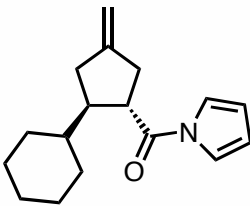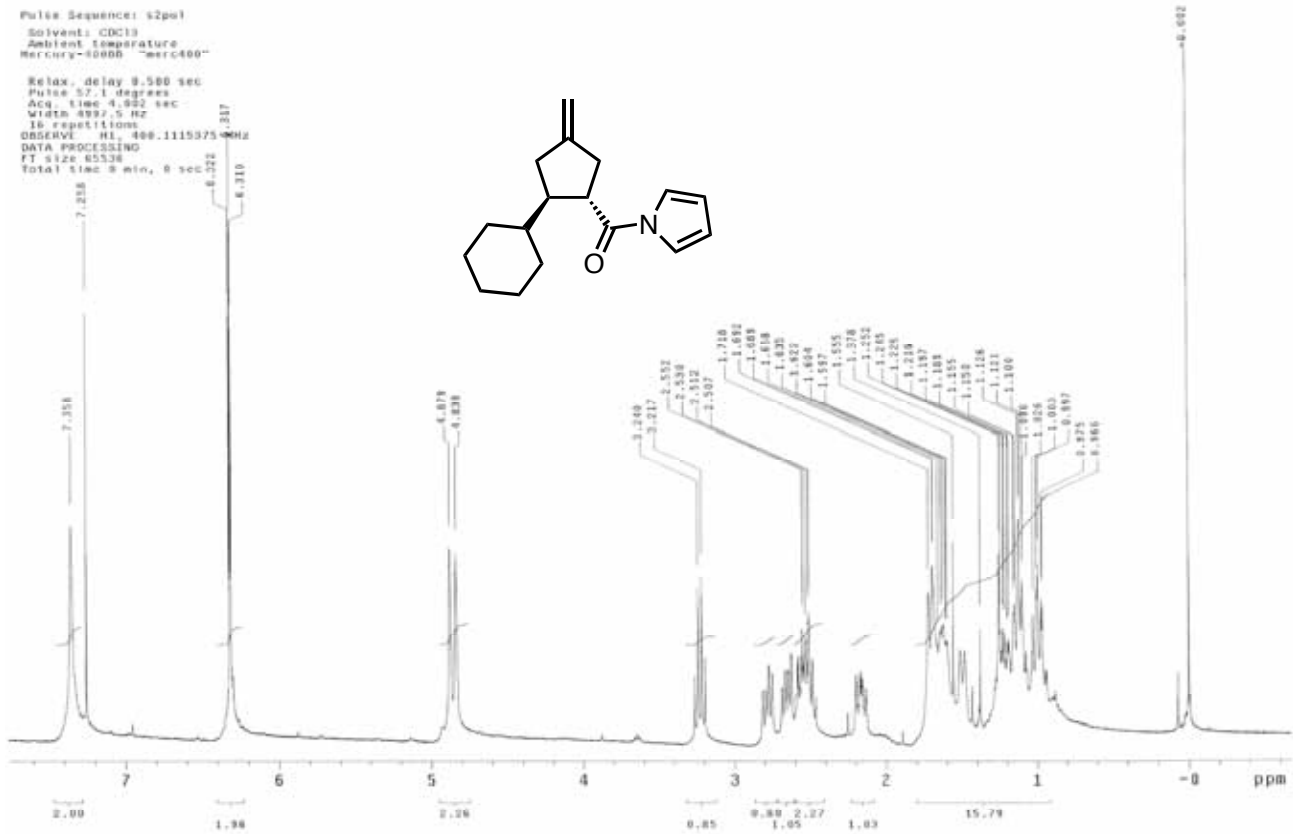

VIII-79A

13C OBSERVE

Pulse Sequence: s2pul  
Solvent: CDCl3  
Ambient temperature  
Mercury-400BB "merc400"

Relax. delay 0.500 sec  
Pulse 35.2 degrees  
Acq. time 1.199 sec  
Width 25000.0 Hz  
624 repetitions  
OBSERVE C13, 100.6081265 MHz  
DECOUPLE H1, 400.1135562 MHz  
Power 43 dB  
continuously on  
WALTZ-16 modulated  
DATA PROCESSING  
Line broadening 1.0 Hz  
FT size 65536  
Total time 1 hr, 7 min, 7 sec

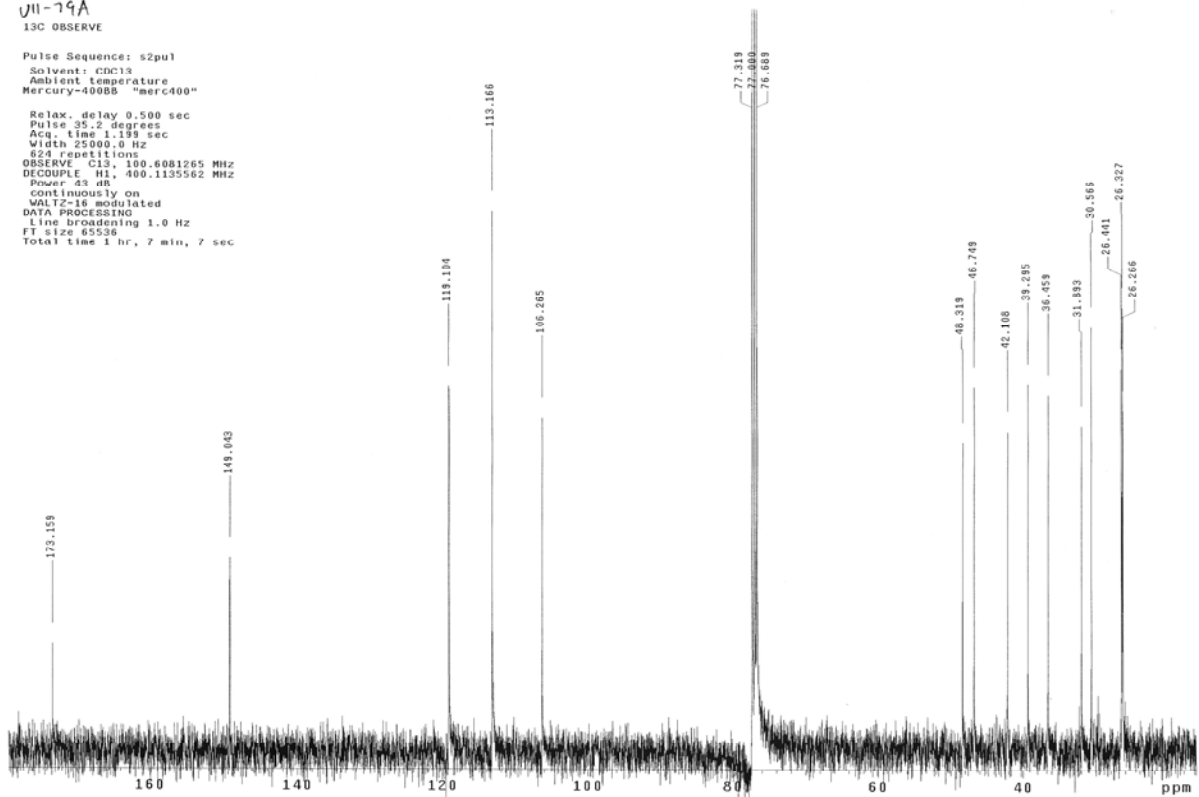

sxxi-65a  
 Pulse Sequence: s2pu1  
 Solvent: CDCl3  
 Ambient temperature  
 Mercury-400BB "merc400"  
 Relax, delay 0.500 sec  
 Pulse 59.0 degrees  
 Acq. time 4.482 sec  
 Width 4927.5 Hz  
 4 repetitions  
 OBSERVE H1, 400.111578 MHz  
 DATA PROCESSING  
 FT size 65536  
 Total time 9 min, 0 sec

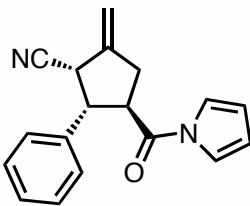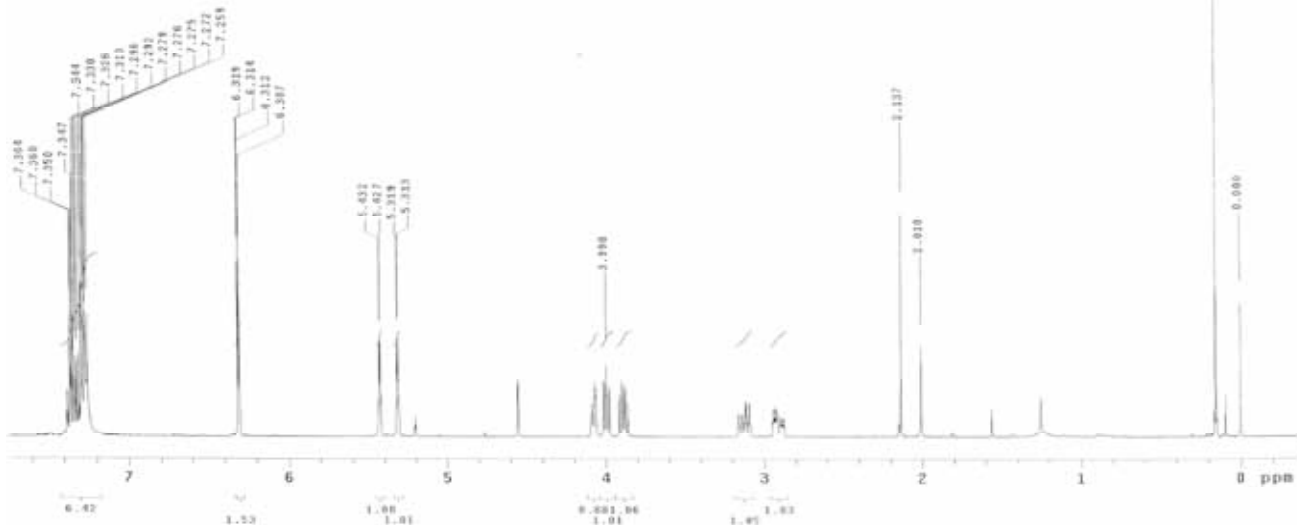

sxxi-64a-13c  
 Pulse Sequence: s2pu1  
 Solvent: CDCl3  
 Ambient temperature  
 Mercury-400BB "merc400"  
 Relax, delay 0.500 sec  
 Pulse 35.2 degrees  
 Acq. time 1.199 sec  
 Width 25000.0 Hz  
 256 repetitions  
 OBSERVE C13, 100.6081286 MHz  
 DECOUPLE H1, 400.110562 MHz  
 Power 43 dB  
 continuously on  
 WALTZ-16 modulated  
 DATA PROCESSING  
 Line broadening 2.0 Hz  
 FT size 65536  
 Total time 33 min, 33 sec

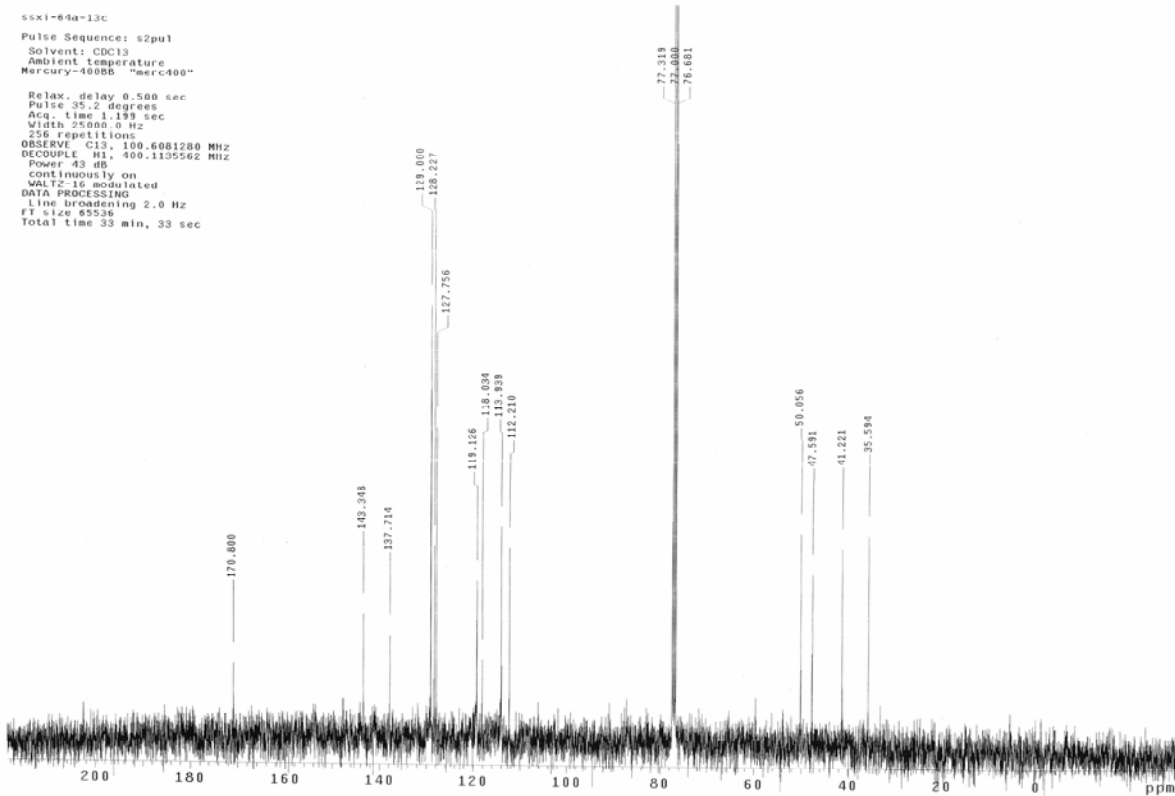

55x1-82a  
 File: Proton  
 Pulse Sequence: s2pul  
 Solvent: CDCl3  
 Temp: 29.9 C / 293.1 K  
 Operator: steves1  
 VNMRS-400 "nmr400"

Relax. delay 2.500 sec  
 Pulse AS 8 degrees  
 Acq. time 2.360 sec  
 Width 8459.5 Hz  
 IS repetitions 340  
 OBSERVE P1 19.770 (4.70) MHz  
 DATA PROCESSING  
 FT size 65536  
 Total time 1 min, 12 sec

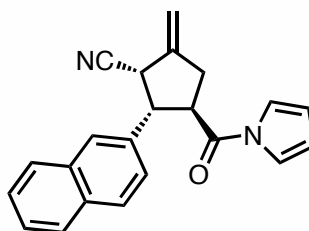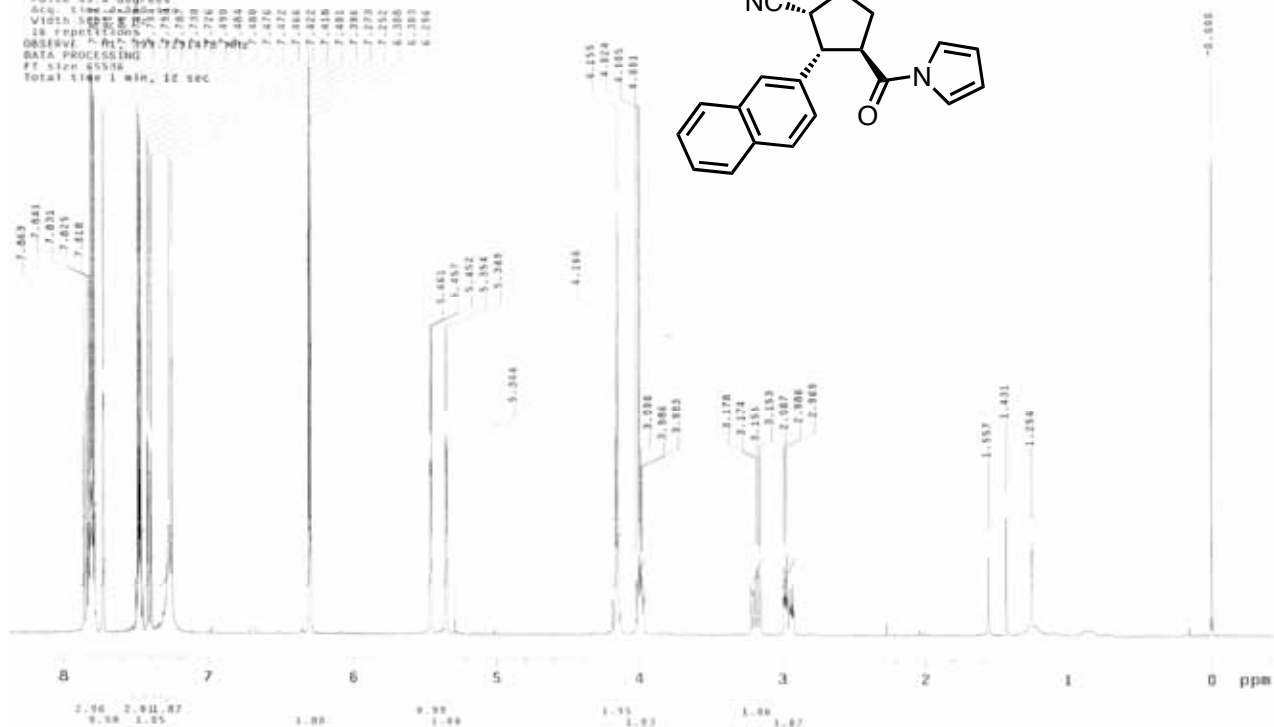

55x1-82a-13c  
 File: Carbon  
 Pulse Sequence: s2pul  
 Solvent: cdcl3  
 Temp: 29.9 C / 293.1 K  
 Operator: steves1  
 VNMRS-400 "nmr400"

Relax. delay 1.000 sec  
 Pulse 44.3 degrees  
 Acq. time 1.300 sec  
 Width 2459.5 Hz  
 IS repetitions 340  
 OBSERVE C13, 100.5119768 MHz  
 DECOUPLE n1, 399.7311439 MHz  
 Power 43 dB  
 Continuously On  
 WALTZ-16 modulated  
 DATA PROCESSING  
 Line broadening 1.0 Hz  
 FT size 65536  
 Total time 1 hr, 18 min, 49 sec

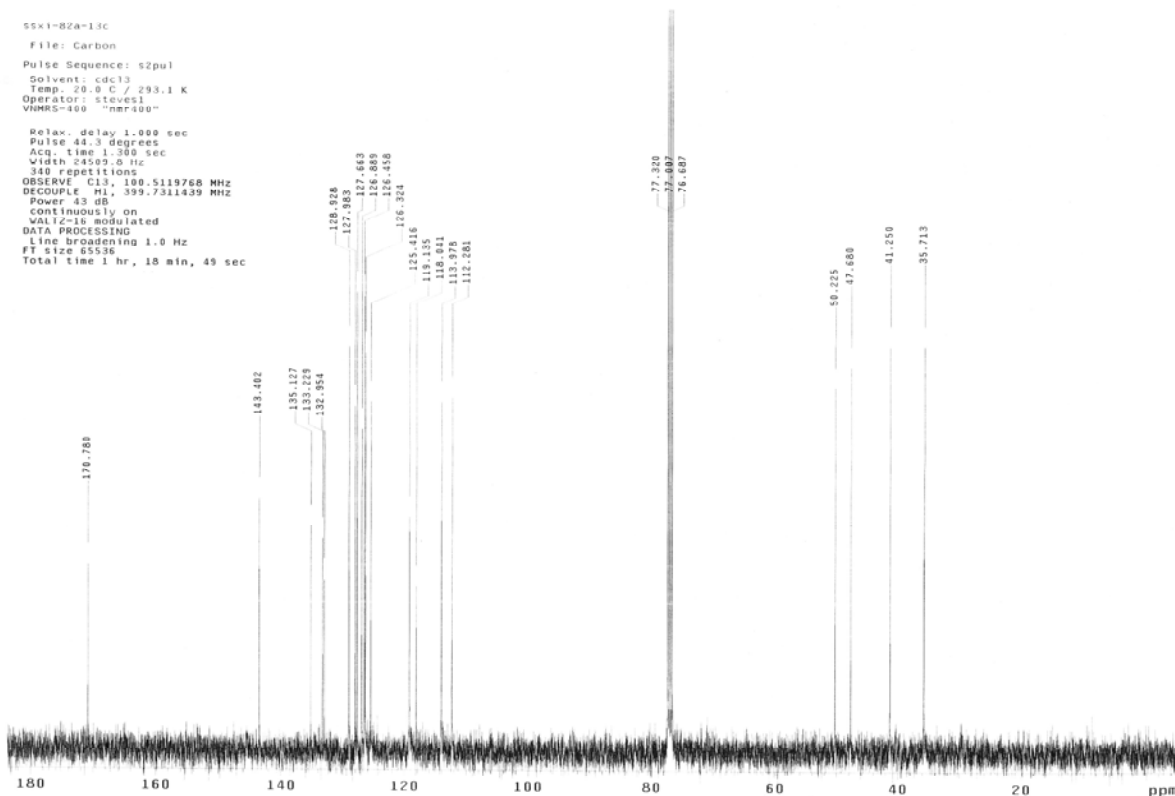

5511-12a  
 File: Proton  
 Pulse Sequence: 42pul  
 Solvent: CDCl3  
 Temp: 22.8 C / 295.1 K  
 Operator: steves1  
 VMRS-100 "nmr400"  
 Relax. delay 8.500 sec  
 Pulse 45.8 degrees  
 Acq. time 4.288 sec  
 Width 5625.4 Hz  
 IS repetitions  
 OBSERVE H1, 399.7281455 MHz  
 DATA PROCESSING  
 FT size 65536  
 Total time 1 min, 12 sec

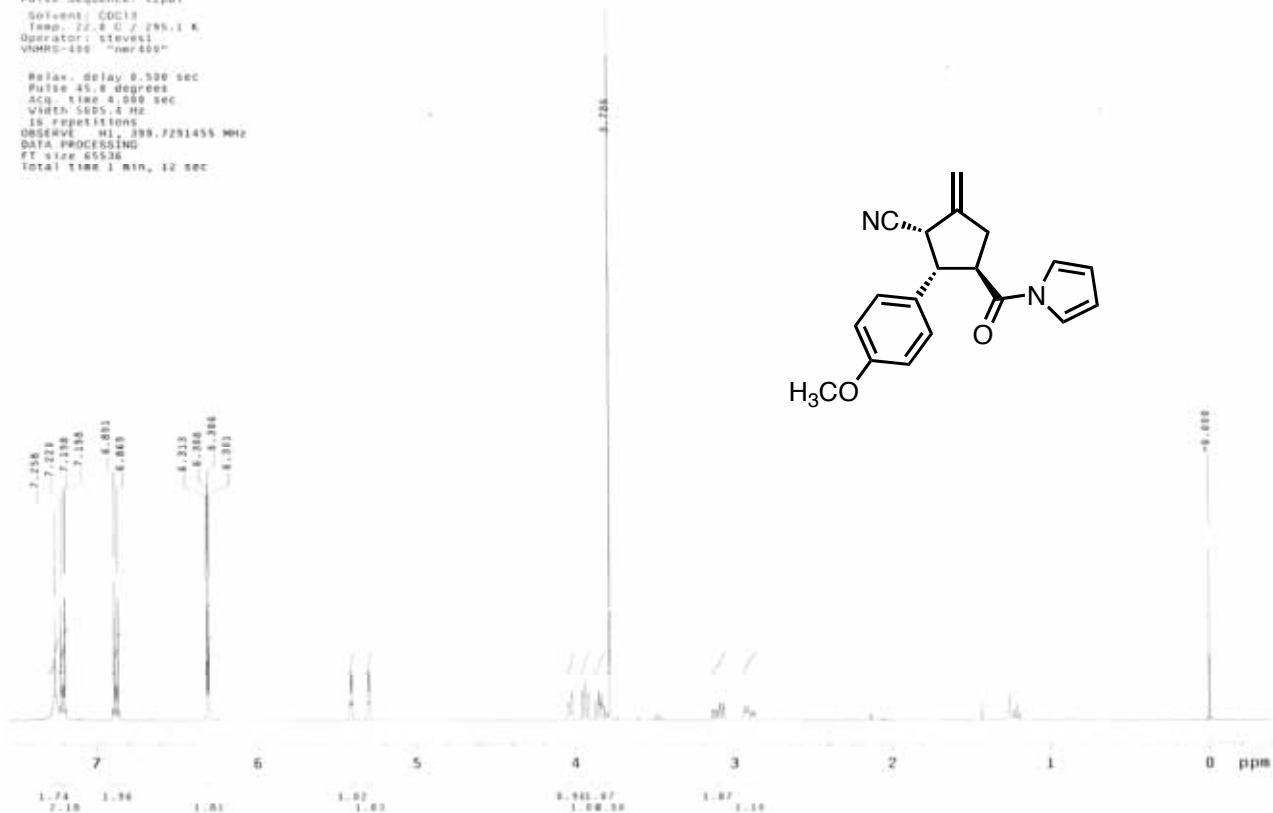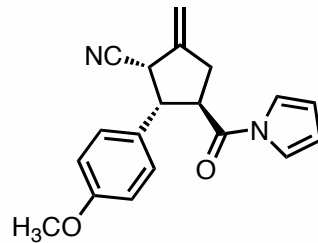

5511-12a-13c  
 File: Carbon  
 Pulse Sequence: s2pul  
 Solvent: cdcl3  
 Temp: 22.8 C / 295.1 K  
 Operator: steves1  
 VMRS-100 "nmr400"  
 Relax. delay 1.000 sec  
 Pulse 44.3 degrees  
 Acq. time 1.350 sec  
 Width 24589.8 Hz  
 688 repetitions  
 OBSERVE C13, 100.5119761 MHz  
 DECOUPLE H1, 399.7311439 MHz  
 Power 43 dB  
 continuously on  
 WALTZ-16 modulated  
 DATA PROCESSING  
 Line broadening 0.5 Hz  
 FT size 65536  
 Total time 39 min, 24 sec

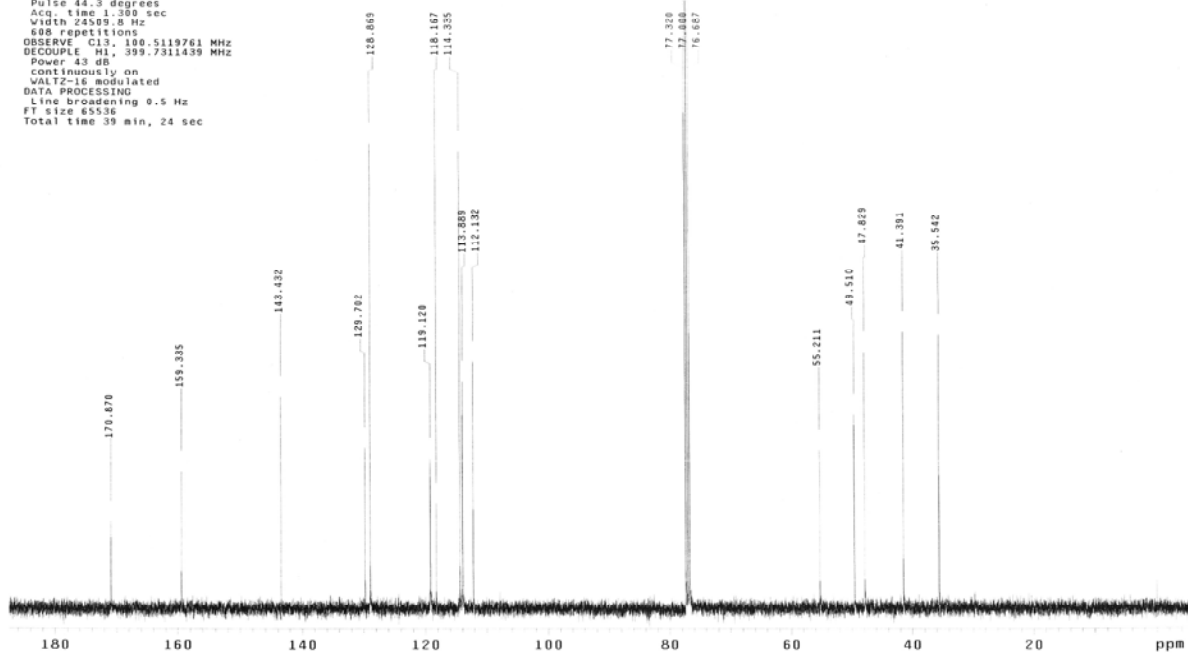

55x11-15a  
 File: Proton  
 Pulse Sequence: s2pul  
 Solvent: cdcl3  
 Temp: 29.9 C / 293.1 K  
 Operator: steves1  
 VNMRS-100 "nmr400"  
 Relax. delay 8.500 sec  
 Pulse 45.3 degrees  
 Acq. time 1.390 sec  
 Width 16399.5 Hz  
 16 repetitions  
 OBSERVE F1: 399.7291433 MHz  
 DATA PROCESSING  
 FT size 65536  
 Total time 1 min, 17 sec

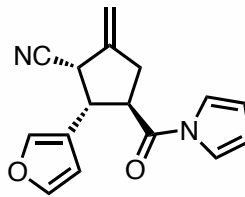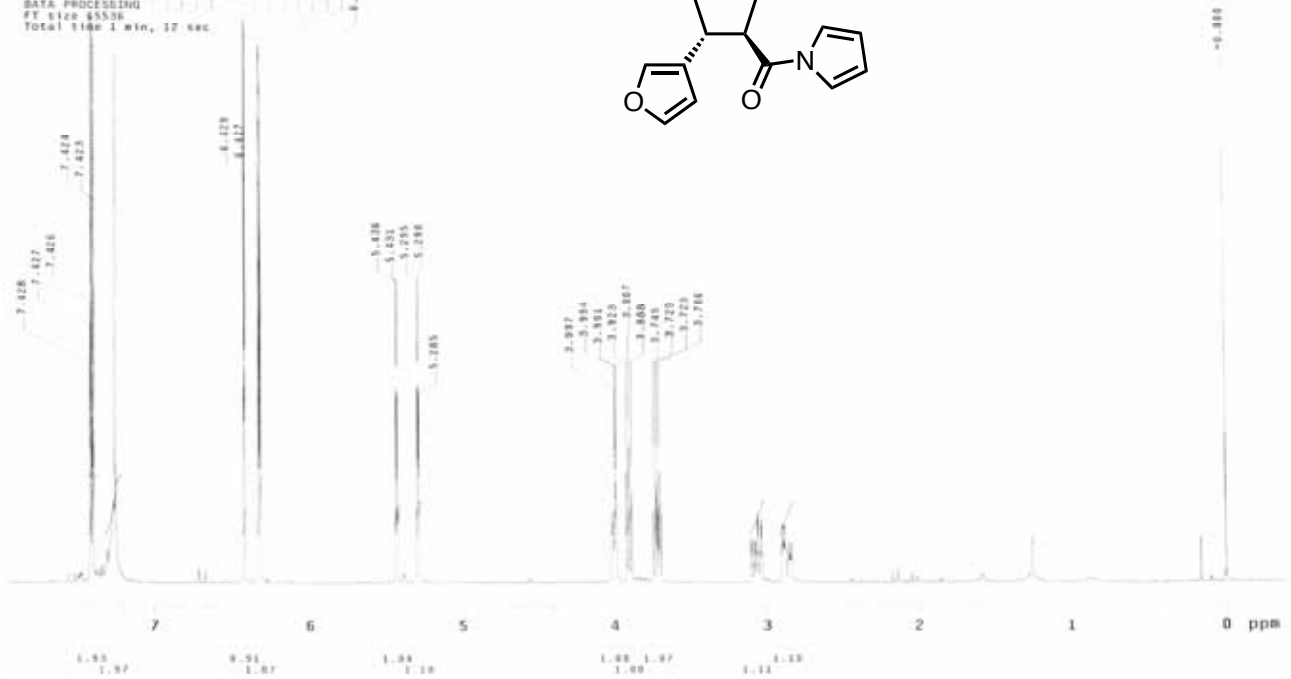

55x11-15a-13c  
 File: Carbon  
 Pulse Sequence: s2pul  
 Solvent: CDCl3  
 Temp: 29.9 C / 293.1 K  
 Operator: steves1  
 VNMRS-100 "nmr400"  
 Relax. delay 1.000 sec  
 Pulse 44.3 degrees  
 Acq. time 1.390 sec  
 Width 24599.5 Hz  
 260 repetitions  
 OBSERVE C13: 100.5119768 MHz  
 DECOUPLE H1: 399.7311433 MHz  
 Power 43 dB  
 Continuously on  
 WALTZ-16 modulated  
 DATA PROCESSING  
 Line broadening 1.0 Hz  
 FT size 65536  
 Total time 19 min, 42 sec

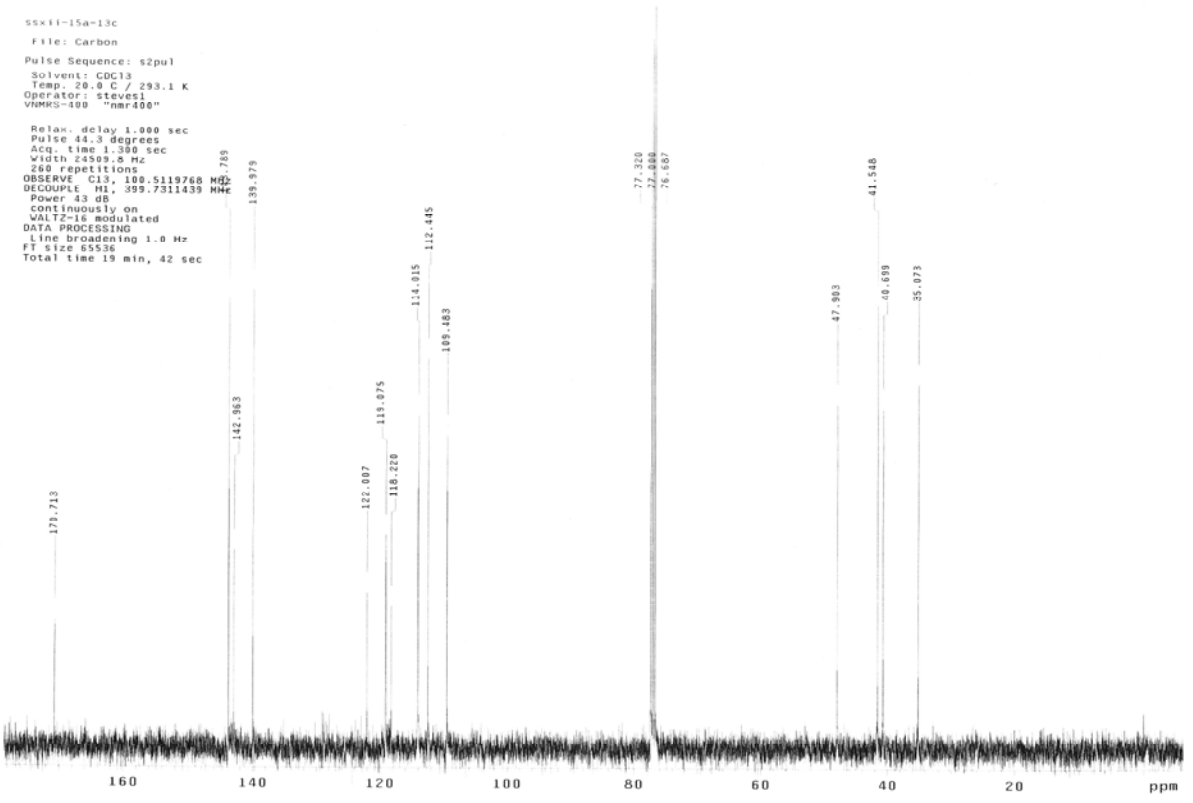

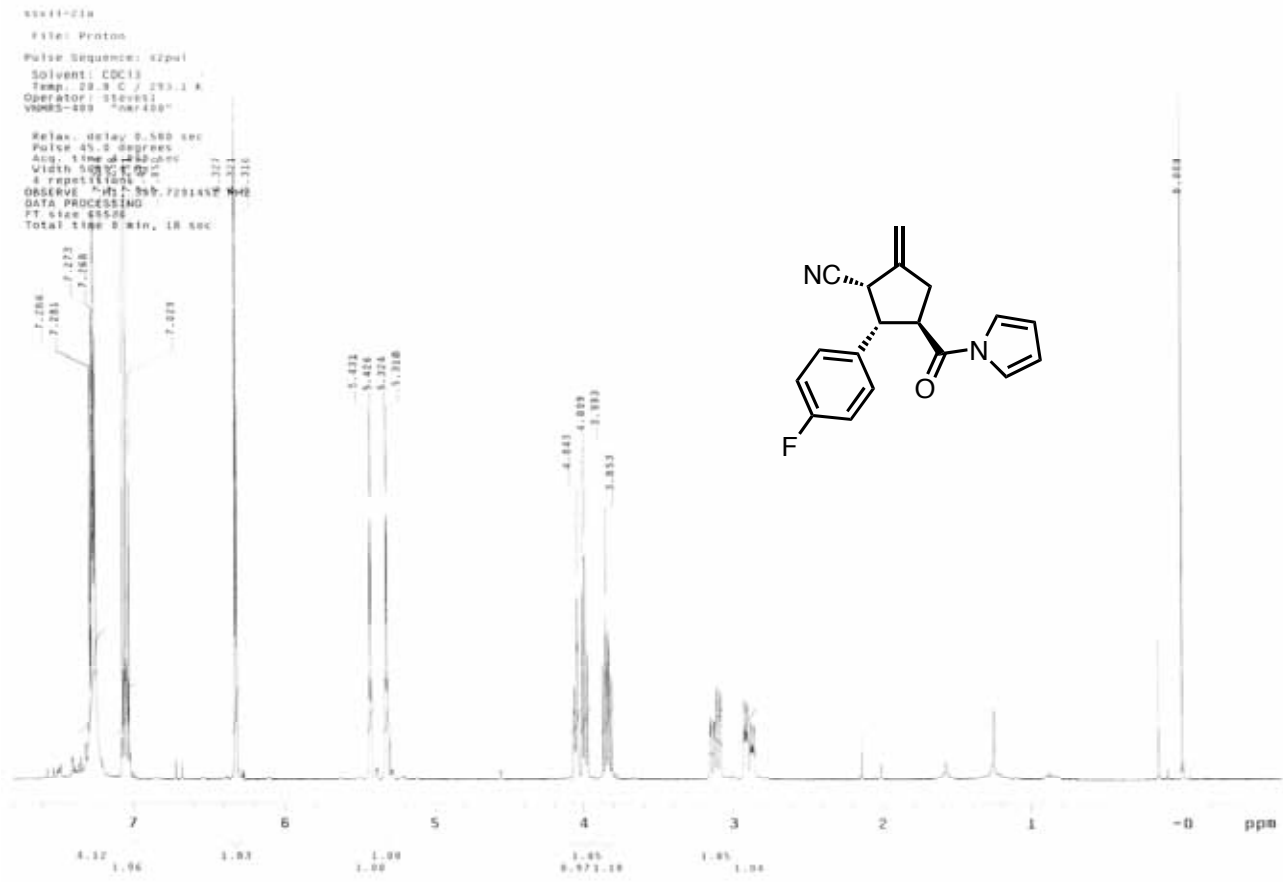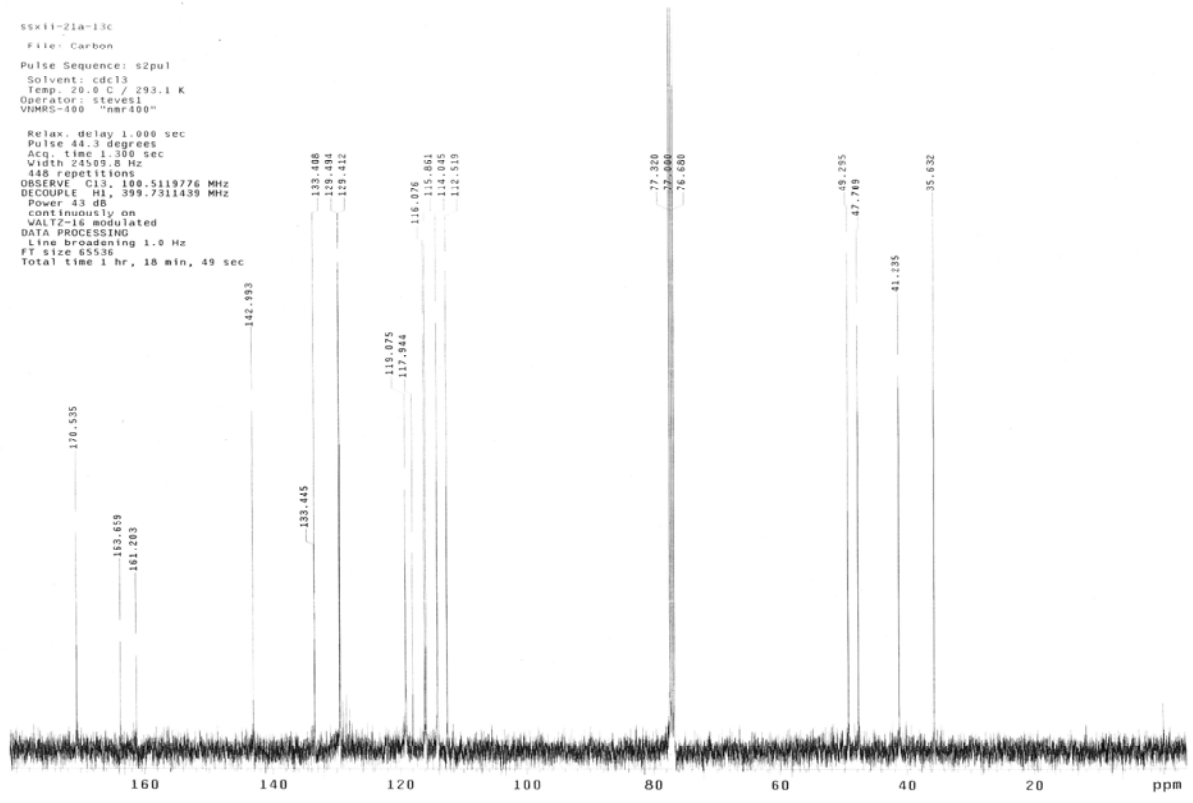

ssxiv-78a  
 File: Proton  
 Pulse Sequence: s2pul  
 Solvent: cdcl3  
 Temp: 28.8 C / 293.1 K  
 Operator: steves1  
 VNMRS-400 "nmr400"

Relax. delay 0.300 sec  
 Pulse 45.0 degrees  
 Acq. time 6.000 sec  
 Width 24509.8 Hz  
 OBSERVE C13, 100.5119761 MHz  
 DECOUPLE H1, 399.7311439 MHz  
 Power 43 db  
 continuously on  
 DATA PROCESSING  
 Line Broadening 2.0 Hz  
 FT size 65536  
 Total time 1 min, 12 sec

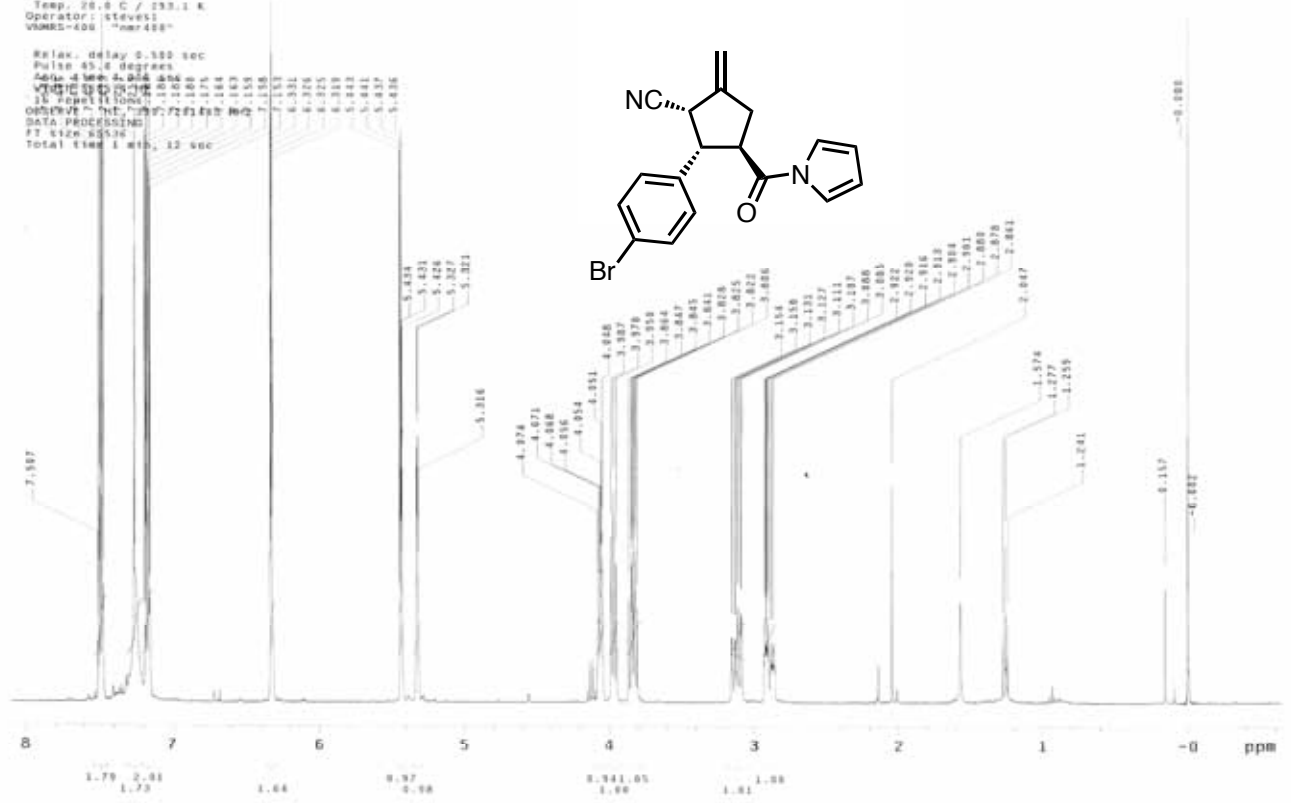

ssxiv-78a-13c  
 File: Carbon  
 Pulse Sequence: s2pul  
 Solvent: cdcl3  
 Temp: 28.0 C / 293.1 K  
 Operator: steves1  
 VNMRS-400 "nmr400"

Relax. delay 1.000 sec  
 Pulse 40.0 degrees  
 Acq. time 1.300 sec  
 Width 24509.8 Hz  
 OBSERVE C13, 100.5119761 MHz  
 DECOUPLE H1, 399.7311439 MHz  
 Power 43 db  
 continuously on  
 DATA PROCESSING  
 Line Broadening 2.0 Hz  
 FT size 65536  
 Total time 19 min, 42 sec

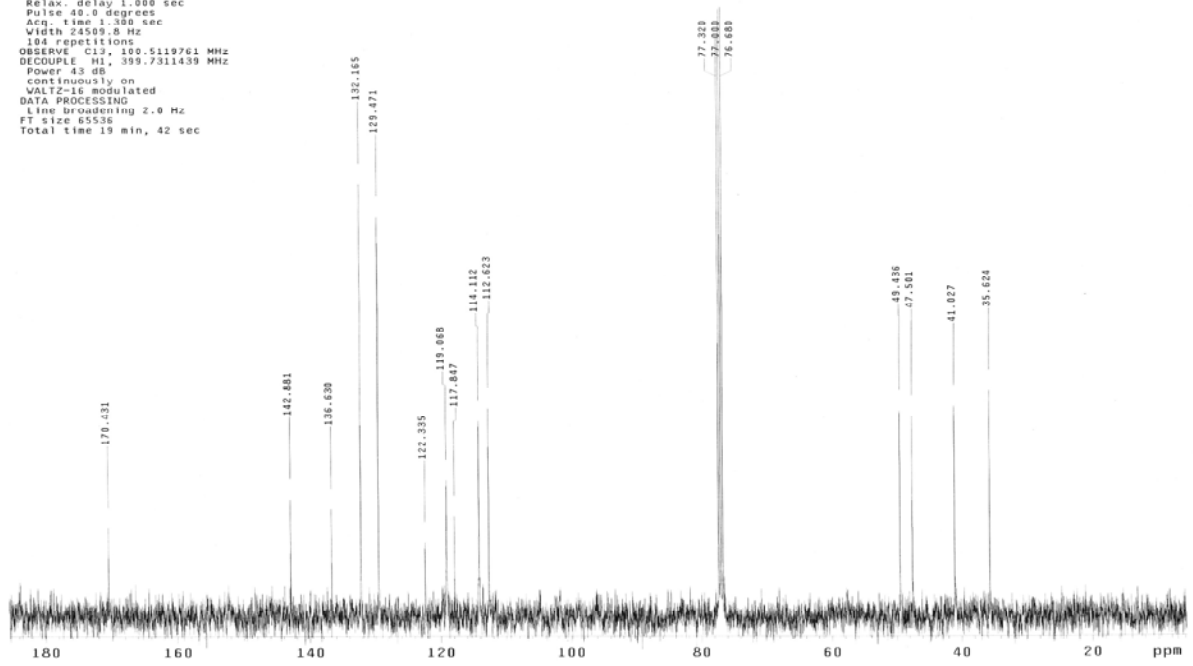



sxxiv-79a  
 File: Proton  
 Pulse Sequence: s2pul  
 Solvent: CDCl3  
 Ambient temperature  
 Operator: steves1  
 VNMRS-400 "mar400"  
 Relax, delay 0.500 sec  
 Pulse 45.0 degrees  
 Acq. time 0.500 sec  
 Width 24500.0 Hz  
 16 repetitions  
 OBSERVE H1, 399.7281439 MHz  
 DATA PROCESSING  
 FT size 65536  
 Total time 1 min, 32 sec

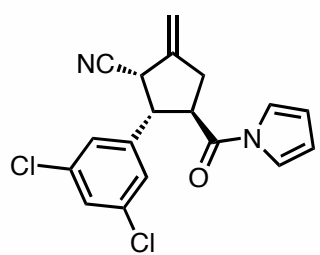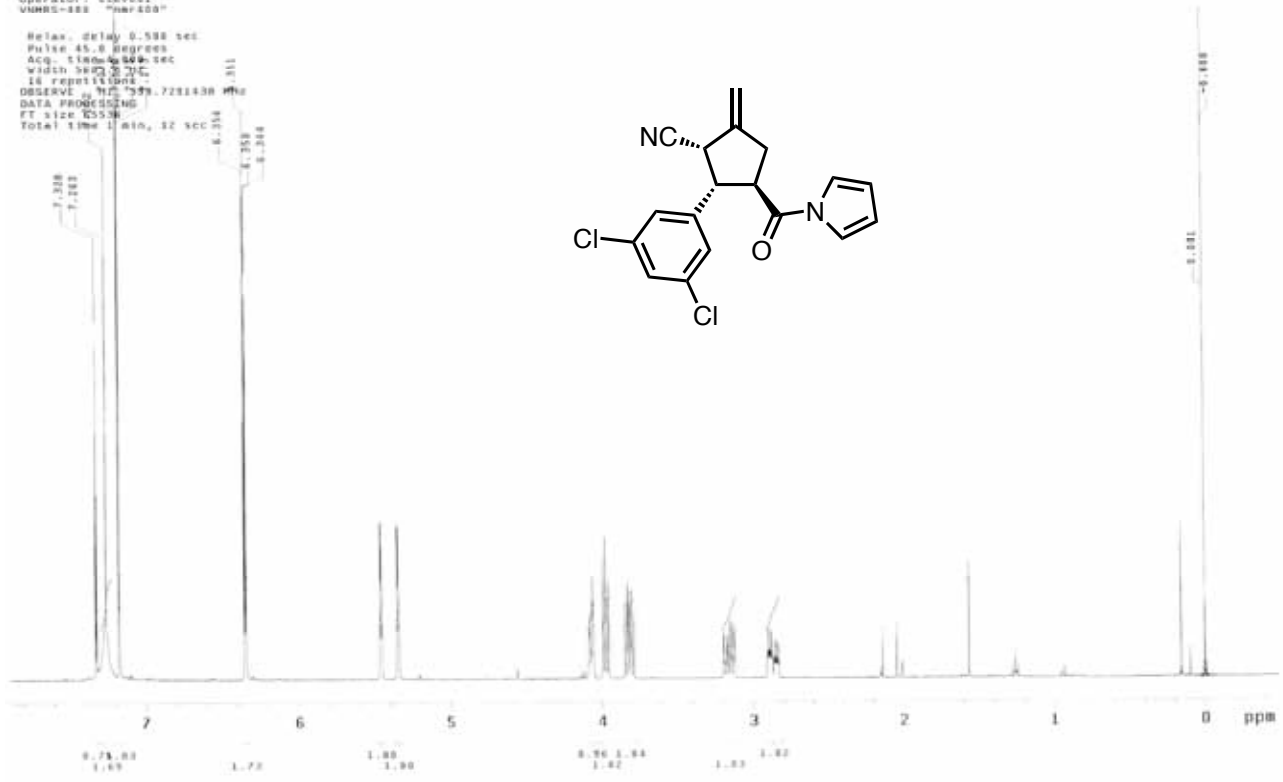

sxxiv-79a-13c  
 File: Carbon  
 Pulse Sequence: s2pul  
 Solvent: cdcl3  
 Ambient temperature  
 Operator: steves1  
 VNMRS-400 "mar400"  
 Relax, delay 1.000 sec  
 Pulse 40.0 degrees  
 Acq. time 1.300 sec  
 Width 24500.0 Hz  
 160 repetitions  
 OBSERVE C13, 100.5119753 MHz  
 DECOUPLE H1, 399.7311439 MHz  
 Power 43 dB  
 continuously on  
 WALTZ-16 modulated  
 DATA PROCESSING  
 Line Broadening 2.0 Hz  
 FT size 65536  
 Total time 19 min, 42 sec

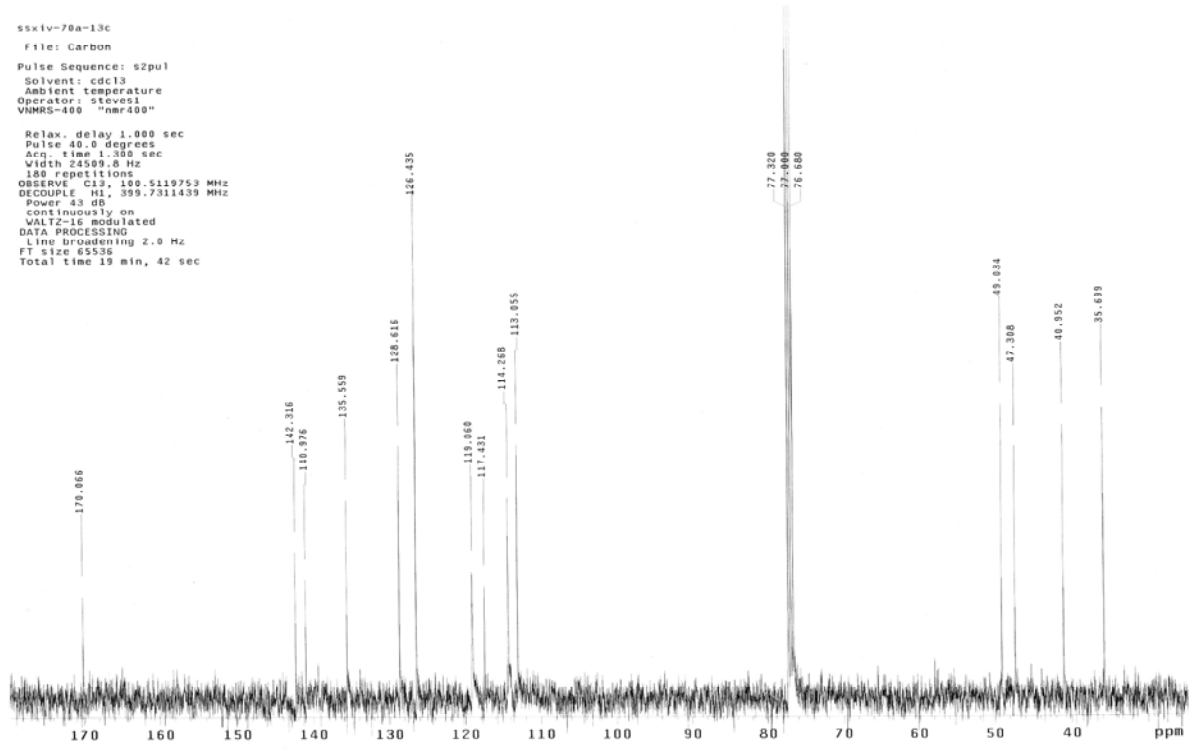



ssxiv-80a  
 Pulse Sequence: s2pu1  
 Solvent: CDCl3  
 Ambient temperature  
 INOVA-500 "ui500"

Pulse 23.0 degrees  
 Acq. time 6.000 sec  
 Width 8000.0 Hz  
 16 repetitions  
 OBSERVE M1, 499.7485766 MHz  
 DATA PROCESSING  
 FT size 43236  
 Total time 1 min

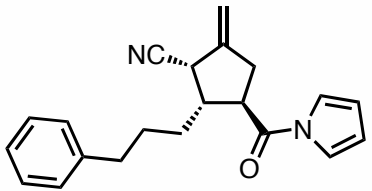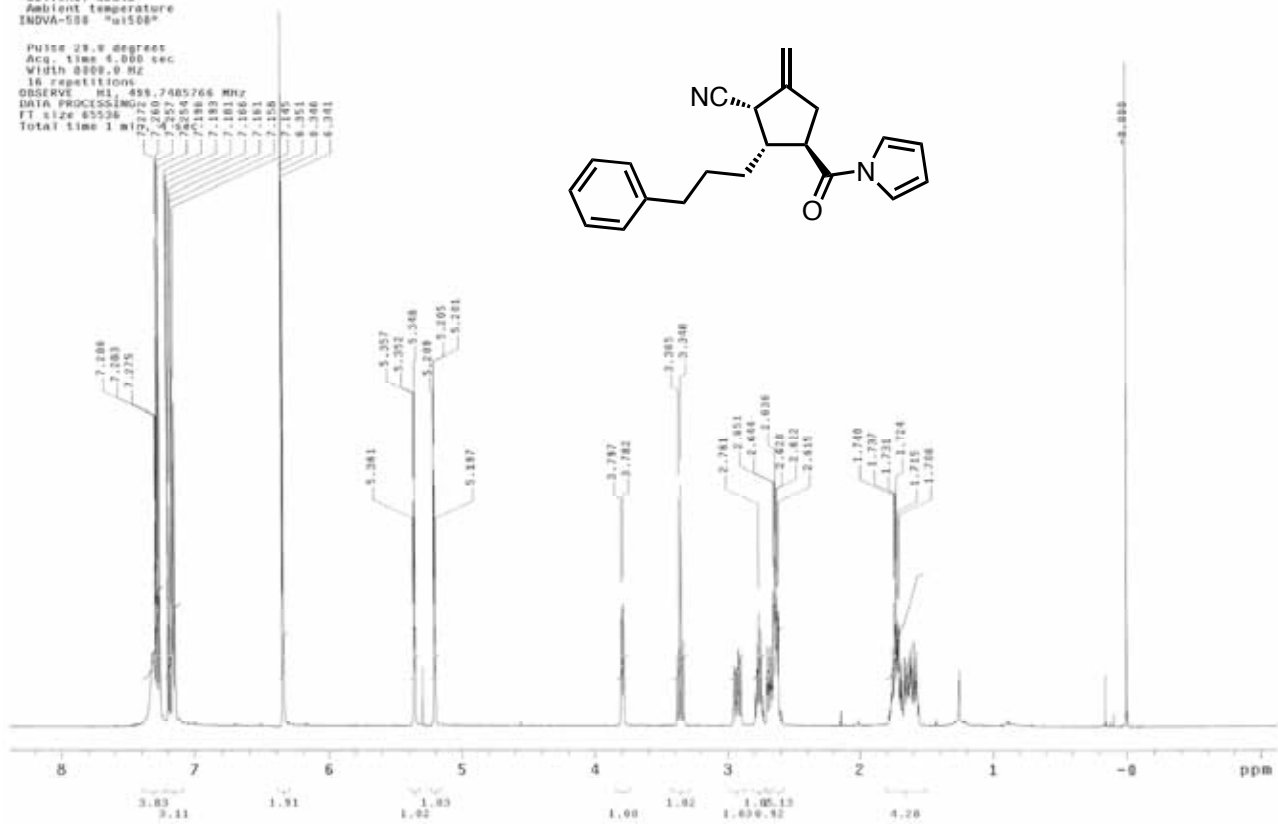

ssxiv-80a-13c  
 Pulse Sequence: c2pu1  
 Solvent: CDCl3  
 Ambient temperature  
 User: 1-15-87  
 INOVA-500 "ui500"

Relax. delay 0.500 sec  
 Pulse 37.5 degrees  
 Acq. time 1.500 sec  
 Width 33000.0 Hz  
 308 repetitions  
 OBSERVE C13, 125.6618844 MHz  
 DECOUPLE M1, 499.7505605 MHz  
 Power 43 dB  
 continuously on  
 WALTZ-16 modulated  
 DATA PROCESSING  
 Line broadening 2.0 Hz  
 FT size 131072  
 Total time 34 min, 17 sec

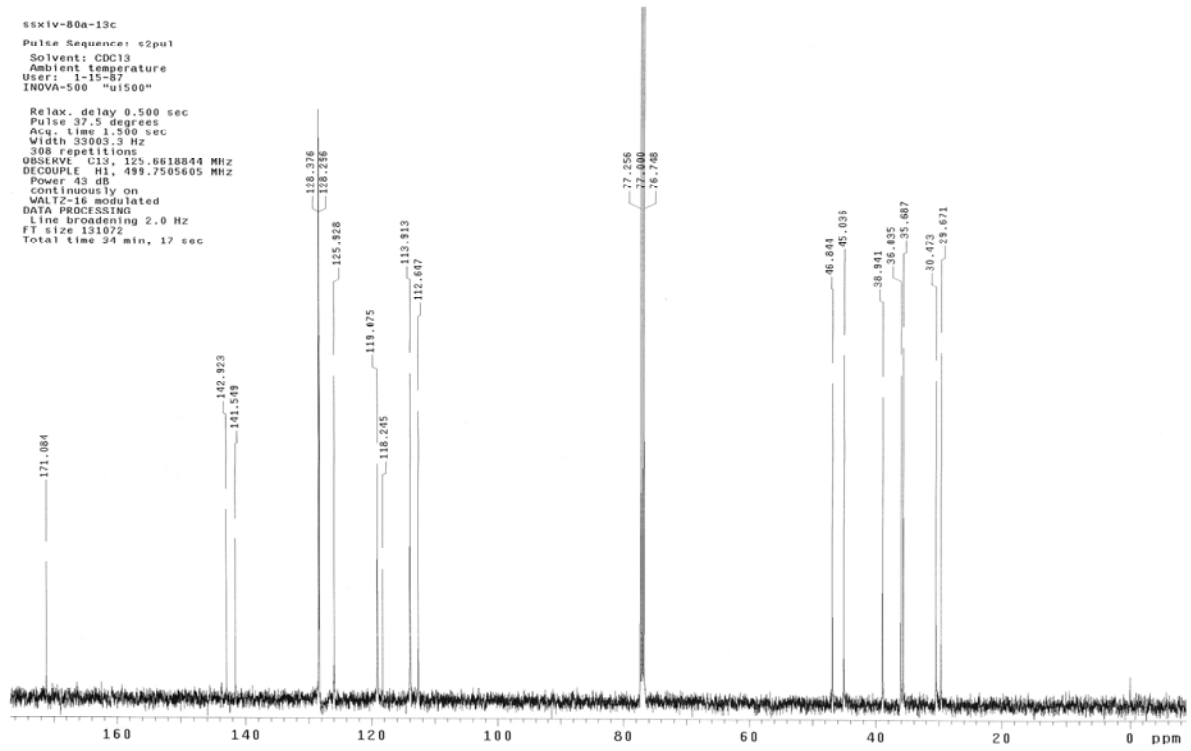

Supplement: NIHMS338074-supplement-2_si_002.pdf [file NIHMS338074-supplement-2_si_002.pdf]
